# Supplementary material for: Synthesis of polysubstituted fused pyrrolidines via [2 + 2]/[2 + 3] cycloaddition of azomethine ylides
Source: Royal Society of Chemistry journal article supplement (doi:10.1039/d4qo00483c), 2024-01-01

## Synthesis of Polysubstituted Fused Pyrrolidines via [2+2]/[2+3]

### Cycloaddition of Azomethine Ylides

Chunyan Ou,<sup>a</sup> Jian Wang,<sup>a</sup> Pingping Yin,<sup>a</sup> Bin Chen,<sup>a</sup> Ping Hu,<sup>a</sup> Bi-Qin Wang,<sup>a</sup>  
Peng Cao,<sup>\*a</sup> and Minghui Xu<sup>\*a</sup>

*College of Chemistry and Materials Science, Sichuan Normal University, Chengdu  
610068, People's Republic of China*

## Contents

|                                                                               |     |
|-------------------------------------------------------------------------------|-----|
| I. General Information .....                                                  | S2  |
| II. General Procedure of Silyl Enol Ethers .....                              | S3  |
| III. Optimization of Reaction Conditions .....                                | S12 |
| IV. General Procedure for Synthesis of 3-Azabicyclo[3.2.0]heptane .....       | S14 |
| V. Determination of the Relative Configuration of 7m by NMR Spectroscopy .... | S35 |
| VI. Gram-scale Reaction and Product Transformation .....                      | S35 |
| VII. Proposed Reaction Mechanism.....                                         | S38 |
| VIII. References .....                                                        | S39 |
| IX. NMR Spectral Data .....                                                   | S41 |

## I. General Information

All commercial reagents were purchased from TCI, Leyan, Energy Chemical and used as received. Solvents used in catalytic reactions were dried and distilled in appropriate method. Solvent employed for column chromatography were purchased in technical grade quality without distillation before use. Column chromatography was performed using glass columns with Silica Gel (Haiyang, 300-400 mesh). Ethyl propiolate (CAS:623-47-2) was purchased from Energy Chemical. N-(Methoxymethyl)-N-(trimethylsilylmethyl)benzylamine (CAS:93102-05-7) was purchased from TCI with a purity of 98%.

All reactions were generally performed in dried glassware filled with dry argon. TLC plates were stained using potassium permanganate. Chromatographic purification of products (column chromatography) was performed on the glass column filled in (300 – 400 Mesh) silica gel. Concentration of reaction product solutions and chromatography fractions under reduced pressure was performed by rotary evaporation at 30 – 40 °C at the appropriate pressure and then at rt, ca. 0.1 mmHg (vacuum pump) unless otherwise indicated. For reactions that require heating, oil bath is used as the heat source.

All unknown compounds starting materials and products were characterized by <sup>1</sup>H NMR, <sup>13</sup>C NMR, high-resolution mass spectrometry (HRMS) and Infrared Spectroscopy (IR). The known desired products were characterized by <sup>1</sup>H NMR. NMR spectra were obtained on a Bruker 600 spectrometer, operating at 600 MHz for <sup>1</sup>H NMR, 151 MHz for <sup>13</sup>C NMR, 565 MHz for <sup>19</sup>F NMR or a Bruker 400 spectrometer, operating at 400 MHz for <sup>1</sup>H NMR, 101 MHz for <sup>13</sup>C NMR. <sup>1</sup>H and <sup>13</sup>C positive chemical shifts ( $\delta$ ) are downfield from tetramethylsilane and are given in parts per million (ppm). Chemical shifts were reported in ppm relative to the central line of CHCl<sub>3</sub> ( $\delta$  7.26) for <sup>1</sup>H NMR, for <sup>13</sup>C NMR, the residual CDCl<sub>3</sub> ( $\delta$  77.16) were used as the internal standards. Coupling constants (*J*) are given in Hertz (Hz). The following abbreviations are used for spin multiplicity: s = singlet, d = doublet, dd = doublet of doublet, dt = doublet of triplet, t = triplet, q = quadruple, m = multiplet. For the characterization of mixtures, \* indicates the overlap of the signals of the two isomers. Electrospray ionization high-resolution mass spectra (ESI-HRMS) and atmospheric pressure chemical ionization

high-resolution mass spectra (APCI-HRMS) were operated in positive ion mode and carried out with a Waters Xevo G2-XS QTOF. IR were determined in Bruker Vertex 70 (KBr).

## II. General Procedure of Silyl Enol Ethers

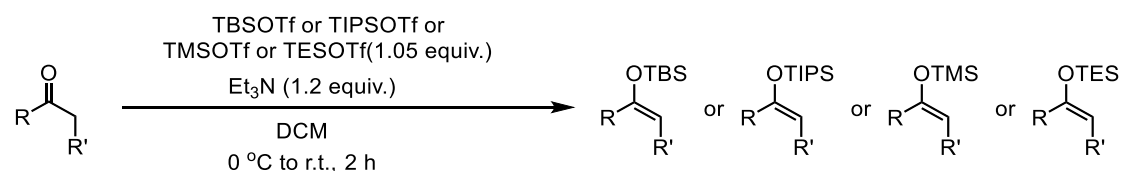

*The reaction was carried out following the previously described procedure<sup>1</sup>.*

**General Procedure:** To a flame-dried two necked round bottom flask ketone (1.0 equiv.) was added under nitrogen atmosphere and dissolved with freshly distilled CH<sub>2</sub>Cl<sub>2</sub>. Subsequently, triethylamine (1.2 equiv.) was added at room temperature. The mixture was stirred for 5 minutes at room temperature. Then, the reaction mixture was cooled to 0 °C and TBSOTf or TIPSOTf or TMSOTf or TESOTf (1.05 equiv.) was added dropwise. The reaction was stirred for 2 h at room temperature and then quenched with a saturated NaHCO<sub>3</sub> aqueous solution. The aqueous layer was extracted with CH<sub>2</sub>Cl<sub>2</sub>. The combined organic layers were dried over Na<sub>2</sub>SO<sub>4</sub> and concentrated under reduced pressure. The resulting crude mixture was purified by silica gel column chromatography (petroleum ether) to afford the corresponding product.

### Tert-butyl(cyclohept-1-en-1-yloxy)dimethylsilane (**1a**)

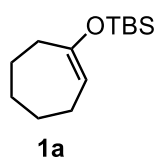

According to the general procedure, the silyl enol ethers **1a** was isolated (petroleum ether as the eluent solvent) as a colorless liquid (0.90 g, 80% yield). Spectroscopic data match with those previously reported<sup>1</sup>. <sup>1</sup>H NMR (400 MHz, CDCl<sub>3</sub>): δ 5.03 – 4.99 (m, 1H), 2.28 – 2.16 (m, 2H), 2.03 – 1.89 (m, 2H), 1.75 – 1.63 (m, 2H), 1.60 – 1.48 (m, 4H), 0.91 (d, *J* = 1.1 Hz, 9H), 0.11 (d, *J* = 1.1 Hz, 6H).

### **Tert-butyl(cyclohex-1-en-1-yloxy)dimethylsilane (1b)**

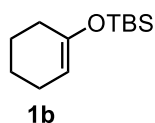

According to the general procedure, the silyl enol ethers **1b** was isolated (petroleum ether as the eluent solvent) as a colorless liquid (0.99 g, 93.5% yield). Spectroscopic data match with those previously reported<sup>1</sup>. <sup>1</sup>H NMR (400 MHz, CDCl<sub>3</sub>): δ 4.88 – 4.86 (m, 1H), 2.05 – 1.96 (m, 4H), 1.70 – 1.62 (m, 2H), 1.55 – 1.46 (m, 2H), 0.92 (s, 9H), 0.12 (s, 6H).

### **Tert-butyl(cyclopent-1-en-1-yloxy)dimethylsilane (1c)**

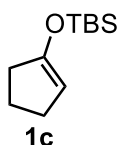

According to the general procedure, the silyl enol ethers **1c** was isolated (petroleum ether as the eluent solvent) as a colorless liquid (0.66 g, 72% yield). Spectroscopic data match with those previously reported<sup>1</sup>. <sup>1</sup>H NMR (400 MHz, CDCl<sub>3</sub>): δ 4.65 – 4.58 (m, 1H), 2.27 – 2.22 (m, 4H), 1.90 – 1.80 (m, 2H), 0.92 (s, 9H), 0.14 (s, 6H).

### **Tert-butyl dimethyl((2-methylcyclopent-1-en-1-yl)oxy)silane (1d)**

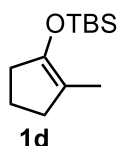

According to the general procedure, the silyl enol ethers **1d** was isolated (petroleum ether as the eluent solvent) as a colorless liquid (0.77 g, 74% yield). Spectroscopic data match with those previously reported<sup>2</sup>. <sup>1</sup>H NMR (400 MHz, CDCl<sub>3</sub>): δ 2.29 – 2.25 (m, 2H), 2.21 – 2.15 (m, 2H), 1.85 – 1.73 (m, 2H), 1.58 – 1.51 (m, 3H), 0.94 (s, 9H), 0.11 (s, 6H).

### **((1H-inden-3-yl)oxy)(tert-butyl)dimethylsilane (1e)**

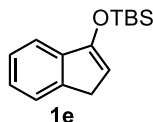

According to the general procedure, the silyl enol ethers **1e** was isolated (petroleum ether as the eluent solvent) as a colorless liquid (0.63 g, 51% yield). Spectroscopic data match with those previously reported<sup>1</sup>. <sup>1</sup>H NMR (400 MHz, CDCl<sub>3</sub>): δ 7.41 – 7.37 (m, 2H), 7.34 – 7.27 (m, 1H), 7.24 – 7.22 (m, 1H), 5.42 (t, *J* = 2.4 Hz, 1H), 3.28 (d, *J* = 2.4 Hz, 2H), 1.04 (s, 9H), 0.26 (s, 6H).

**((7-Bromo-1H-inden-3-yl)oxy)(tert-butyl)dimethylsilane (1f)**

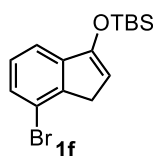

According to the general procedure, the silyl enol ethers **1f** was isolated (petroleum ether as the eluent solvent) as a colorless liquid (1.41 g, 87% yield). <sup>1</sup>H NMR (400 MHz, CDCl<sub>3</sub>) δ 7.38 – 7.30 (m, 2H), 7.22 – 7.15 (m, 1H), 5.57 – 5.26 (m, 1H), 3.28 – 3.17 (m, 2H), 1.03 (s, 9H), 0.25 (s, 6H). <sup>13</sup>C NMR (151 MHz, CDCl<sub>3</sub>): δ 153.4, 143.8, 142.6, 128.3, 128.1, 118.9, 117.3, 106.6, 35.3, 25.7, 18.3, -4.7. IR(KBr): ν 2945, 1720, 1604, 1257, 877, 678. HRMS(APCI) (*m/z*): [M+H]<sup>+</sup> Calcd for C<sub>15</sub>H<sub>22</sub>BrOSi 325.0618; found: 325.0618.

**Tert-butyl((3,4-dihydronaphthalen-1-yl)oxy)dimethylsilane (1g)**

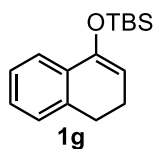

According to the general procedure, the silyl enol ethers **1g** was isolated (petroleum ether as the eluent solvent) as a colorless liquid (1.05 g, 81% yield). Spectroscopic data match with those previously reported<sup>2</sup>. <sup>1</sup>H NMR (400 MHz, CDCl<sub>3</sub>): δ 7.47 (d, *J* = 7.2 Hz, 1H), 7.22 – 7.09 (m, 3H), 5.19 – 5.16 (m, 1H), 2.75 (t, *J* = 8.0 Hz, 2H), 2.36 – 2.27 (m, 2H), 1.01 (s, 9H), 0.20 (s, 6H).

**Tert-butyl dimethyl((1,2,3,6-tetrahydro-[1,1'-biphenyl]-4-yl)oxy)silane (1h)**

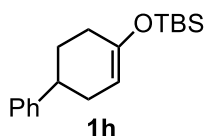

According to the general procedure, the silyl enol ethers **1h** was isolated (petroleum ether as the eluent solvent) as a colorless liquid (1.27 g, 88% yield). Spectroscopic data match with those previously reported<sup>3</sup>. <sup>1</sup>H NMR (400 MHz, CDCl<sub>3</sub>): δ 7.36 – 7.16 (m, 5H), 4.96 – 4.94 (m, 1H), 2.84 – 2.68 (m, 1H), 2.34 – 2.14 (m, 3H), 2.07 (m, 1H), 2.01 – 1.79 (m, 2H), 0.94 (s, 9H), 0.16 (s, 6H).

**Tert-butyl((4-(tert-butyl)cyclohex-1-en-1-yl)oxy)dimethylsilane (1i)**

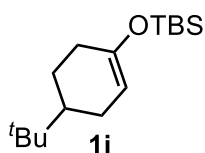

According to the general procedure, the silyl enol ethers **1i** was isolated (petroleum ether as the eluent solvent) as a colorless liquid (1.16 g, 87% yield). Spectroscopic data match with those previously reported<sup>4</sup>. <sup>1</sup>H NMR (400 MHz, CDCl<sub>3</sub>): δ 4.89 – 4.79 (m, 1H), 2.05 – 1.94 (m, 2H), 1.86 – 1.72 (m, 2H), 1.53 (s, 1H), 1.31 – 1.14 (m, 2H), 0.93 – 0.90 (m, 9H), 0.86 (d, *J* = 0.6 Hz, 9H), 0.15 – 0.09 (m, 6H).

**Tert-butyl((4,4-difluorocyclohex-1-en-1-yl)oxy)dimethylsilane (1j)**

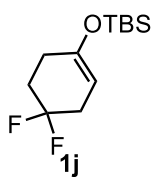

According to the general procedure, the silyl enol ethers **1j** was isolated (petroleum ether as the eluent solvent) as a colorless liquid (0.87 g, 70% yield). Spectroscopic data match with those previously reported<sup>5</sup>. <sup>1</sup>H NMR (400 MHz, CDCl<sub>3</sub>): δ 4.77 – 4.60 (m, 1H), 2.57 – 2.44 (m, 2H), 2.30 – 2.20 (m, 2H), 2.15 – 1.99 (m, 2H), 0.91 (s, 9H), 0.13 (s, 6H).

**(Cyclohept-1-en-1-yloxy)trimethylsilane (1k)**

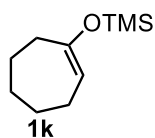

According to the general procedure, the silyl enol ethers **1k** was isolated (petroleum ether as the eluent solvent) as a colorless liquid (0.52 g, 57% yield). Spectroscopic data match with those previously reported<sup>6</sup>. <sup>1</sup>H NMR (400 MHz, CDCl<sub>3</sub>): δ 5.02 (t, *J* = 6.6 Hz, 1H), 2.25 – 2.19 (m, 2H), 2.02 – 1.94 (m, 2H), 1.72 – 1.63 (m, 2H), 1.59 – 1.49 (m, 4H), 0.16 (s, 9H).

**(Cyclohept-1-en-1-yloxy)triethylsilane (1l)**

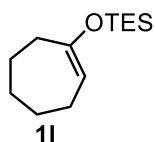

According to the general procedure, the silyl enol ethers **1l** was isolated (petroleum ether as the eluent solvent) as a colorless liquid (0.88 g, 78% yield). Spectroscopic data match with those previously reported<sup>7</sup>. <sup>1</sup>H NMR (400 MHz, CDCl<sub>3</sub>): δ 5.01 (t, *J* = 6.6 Hz, 1H), 2.29 – 2.20 (m, 2H), 2.03 – 1.93 (m, 2H), 1.74 – 1.63 (m, 2H), 1.62 – 1.47 (m, 4H), 0.97 (t, *J* = 8.0 Hz, 9H), 0.65 (m, 6H).

**(Cyclohept-1-en-1-yloxy)triisopropylsilane (1m)**

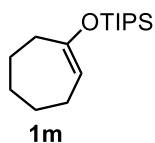

According to the general procedure, the silyl enol ethers **1m** was isolated (petroleum ether as the eluent solvent) as a colorless liquid (0.89 g, 66% yield). Spectroscopic data match with those previously reported<sup>8</sup>. <sup>1</sup>H NMR (400 MHz, CDCl<sub>3</sub>): δ 5.01 – 4.99 (m, 1H), 2.28 (dt, *J* = 8.2, 2.7 Hz, 2H), 1.98 – 1.96 (m, 2H), 1.68 – 1.66 (m, 2H), 1.61 – 1.59 (m, 2H), 1.52 – 1.50 (m, 2H), 1.08 (dd, *J* = 6.2, 2.6 Hz, 18H).

**Tert-butyl dimethyl((1-phenylvinyl)oxy)silane (6a)**

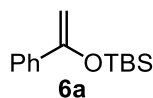

According to the general procedure, the silyl enol ethers **6a** was isolated (petroleum ether as the eluent solvent) as a colorless liquid (0.5 g, 43% yield). Spectroscopic data match with those previously reported<sup>1</sup>. <sup>1</sup>H NMR (400 MHz, CDCl<sub>3</sub>): δ 7.65 – 7.57 (m, 2H), 7.36 – 7.24 (m, 3H), 4.89 (d, *J* = 1.7 Hz, 1H), 4.42 (d, *J* = 1.7 Hz, 1H), 1.01 (s, 9H), 0.22 (s, 6H).

**Tert-butyl((1-(3-fluorophenyl)vinyl)oxy)dimethylsilane (6b)**

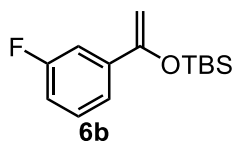

According to the general procedure, the silyl enol ethers **6b** was isolated (petroleum ether as the eluent solvent) as a colorless liquid (1.22 g, 97% yield). Spectroscopic data match with those previously reported<sup>9</sup>. <sup>1</sup>H NMR (400 MHz, CDCl<sub>3</sub>): δ 7.42 – 7.18 (m, 3H), 6.98 – 6.96 (m, 1H), 4.89 (d, *J* = 1.9 Hz, 1H), 4.45 (d, *J* = 1.9 Hz, 1H), 1.00 (s, 9H), 0.21 (s, 6H).

**Tert-butyl((1-(4-fluorophenyl)vinyl)oxy)dimethylsilane (6c)**

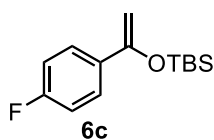

According to the general procedure, the silyl enol ethers **6c** was isolated (petroleum ether as the eluent solvent) as a colorless liquid (0.84 g, 67% yield). Spectroscopic data match with those previously reported<sup>10</sup>. <sup>1</sup>H NMR (400 MHz, CDCl<sub>3</sub>): δ 7.62 – 7.51 (m, 2H), 7.05 – 6.94 (m, 2H), 4.81 (d, *J* = 1.9, 1H), 4.39 (d, *J* = 1.8, 1H), 1.00 (s, 9H), 0.21 (s, 6H).

**Tert-butyl((1-(3-chlorophenyl)vinyl)oxy)dimethylsilane (6d)**



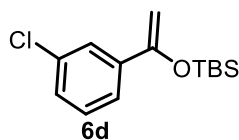

According to the general procedure, the silyl enol ethers **6d** was isolated (petroleum ether as the eluent solvent) as a colorless liquid (1.06 g, 79% yield). Spectroscopic data match with those previously reported<sup>9</sup>. **<sup>1</sup>H NMR** (400 MHz, CDCl<sub>3</sub>): δ 7.64 – 7.55 (m, 1H), 7.49 – 7.46 (m, 1H), 7.30 – 7.16 (m, 2H), 4.89 (d, *J* = 2.2 Hz, 1H), 4.45 (d, *J* = 2.0 Hz, 1H), 1.01 (s, 9H), 0.28 – 0.17 (s, 6H).

**Tert-butyl((1-(4-chlorophenyl)vinyl)oxy)dimethylsilane (6e)**

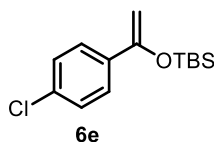

According to the general procedure, the silyl enol ethers **6e** was isolated (petroleum ether as the eluent solvent) as a colorless liquid (0.55 g, 41% yield). Spectroscopic data match with those previously reported<sup>9</sup>. **<sup>1</sup>H NMR** (400 MHz, CDCl<sub>3</sub>): δ 7.55 – 7.49 (m, 2H), 7.32 – 7.27 (m, 2H), 4.86 (d, *J* = 1.9 Hz, 1H), 4.42 (dd, *J* = 2.0, 1H), 0.99 (s, 9H), 0.20 (s, 6H).

**((1-(2-Bromophenyl)vinyl)oxy)(tert-butyl)dimethylsilane (6f)**

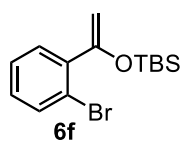

According to the general procedure, the silyl enol ethers **6f** was isolated (petroleum ether as the eluent solvent) as a colorless liquid (1.21 g, 77% yield). **<sup>1</sup>H NMR** (400 MHz, CDCl<sub>3</sub>): δ 7.59 – 7.53 (m, 1H), 7.41 – 7.37 (m, 1H), 7.30 – 7.23 (m, 1H), 7.17 – 7.11 (m, 1H), 4.63 (d, *J* = 1.3 Hz, 1H), 4.54 (d, *J* = 1.3 Hz, 1H), 0.92 (s, 9H), 0.12 (s, 6H). **<sup>13</sup>C NMR** (101 MHz, CDCl<sub>3</sub>): δ 156.1, 140.3, 133.2, 130.5, 129.3, 126.94, 96.5, 25.7, -4.7. **IR**(KBr): ν 2949, 1722, 1615, 1262, 867, 678. **HRMS**(APCI) (*m/z*): [M+H]<sup>+</sup> Calcd for C<sub>14</sub>H<sub>22</sub>BrOSi 313.0618; found: 313.0632.

**((1-(3-Bromophenyl)vinyl)oxy)(tert-butyl)dimethylsilane (6g)**

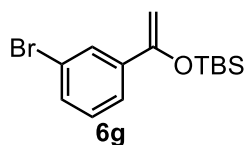

According to the general procedure, the silyl enol ethers **6g** was isolated (petroleum ether as the eluent solvent) as a colorless liquid (1.42 g, 92% yield). Spectroscopic data match with those previously reported<sup>7</sup>. <sup>1</sup>H NMR (400 MHz, CDCl<sub>3</sub>): δ 7.75 – 7.73 (m, 1H), 7.53 – 7.51 (m, 1H), 7.42 – 7.40 (m, 1H), 7.19 (t, *J* = 7.9 Hz, 1H), 4.88 (t, *J* = 3.3 Hz, 1H), 4.45 (d, *J* = 1.9 Hz, 1H), 1.00 (s, 9H), 0.21 (s, 6H).

**((1-(4-bromophenyl)vinyl)oxy)(tert-butyl)dimethylsilane (6h)**

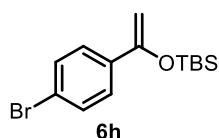

According to the general procedure, the silyl enol ethers **6h** was isolated (petroleum ether as the eluent solvent) as a colorless liquid (1.08 g, 69% yield). Spectroscopic data match with those previously reported<sup>6</sup>. <sup>1</sup>H NMR (400 MHz, CDCl<sub>3</sub>): δ 7.54 – 7.35 (m, 4H), 4.88 – 4.86 (m, 1H), 4.44 – 4.42 (m, 1H), 0.99 (s, 9H), 0.20 (s, 6H).

**Tert-butyl dimethyl((1-(3-nitrophenyl)vinyl)oxy)silane (6i)**

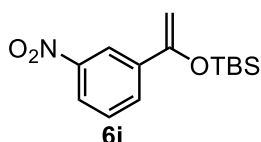

According to the general procedure, the silyl enol ethers **6i** was isolated (petroleum ether as the eluent solvent) as a colorless liquid (1.28 g, 93% yield). Spectroscopic data match with those previously reported<sup>9</sup>. <sup>1</sup>H NMR (400 MHz, CDCl<sub>3</sub>): δ 8.47 – 8.45 (m, 1H), 8.15 – 8.13 (m, 1H), 7.94 – 7.88 (m, 1H), 7.50 – 7.48 (m, 1H), 5.05 – 4.99 (m, 1H), 4.56 (d, *J* = 2.3 Hz, 1H), 1.02 (s, 9H), 0.24 (s, 6H).

**4-(1-((Tert-butyl dimethylsilyl)oxy)vinyl)benzotrile (6j)**

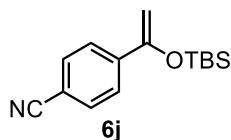

According to the general procedure, the silyl enol ethers **6j** was isolated (petroleum ether as the eluent solvent) as a colorless liquid (0.58 g, 45% yield). Spectroscopic data match with those previously reported<sup>11</sup>. **<sup>1</sup>H NMR** (400 MHz, CDCl<sub>3</sub>): δ 7.72 – 7.66 (m, 2H), 7.64 – 7.57 (m, 2H), 5.00 (d, *J* = 2.2 Hz, 1H), 4.57 (d, *J* = 2.2 Hz, 1H), 1.00 (s, 9H), 0.22 (s, 6H).

**Tert-butyldimethyl((1-(*o*-tolyl)vinyl)oxy)silane (6k)**

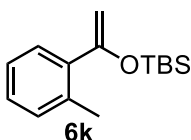

According to the general procedure, the silyl enol ethers **6k** was isolated (petroleum ether as the eluent solvent) as a colorless liquid (1.14 g, 92% yield). Spectroscopic data match with those previously reported<sup>9</sup>. **<sup>1</sup>H NMR** (400 MHz, CDCl<sub>3</sub>): δ 7.33 – 7.28 (m, 1H), 7.17 – 7.15 (m, 3H), 4.56 (s, 1H), 4.38 (s, 1H), 2.40 (s, 3H), 0.91 (s, 9H), 0.09 (s, 6H).

**(*Z*)-Tert-butyldimethyl((1-phenylbut-1-en-1-yl)oxy)silane (6l)**

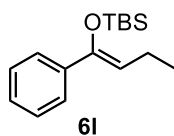

According to the general procedure, the silyl enol ethers **6l** was isolated (petroleum ether as the eluent solvent) as a colorless liquid (1.00 g, 77% yield). Spectroscopic data match with those previously reported<sup>12</sup>. **<sup>1</sup>H NMR** (400 MHz, CDCl<sub>3</sub>): δ 7.44 – 7.42 (m, 2H), 7.30 – 7.22 (m, 3H), 5.10 – 5.08 (m, 1H), 2.23 – 2.21 (m, 2H), 1.05 – 1.00 (m, 3H), 0.99 – 0.97 (s, 9H), -0.05 (s, 6H).

**(*Z*)-Tert-butyl((1-(4-chlorophenyl)prop-1-en-1-yl)oxy)dimethylsilane (6m)**

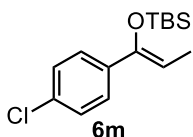

According to the general procedure, the silyl enol ethers **6m** was isolated (petroleum ether as the eluent solvent) as a colorless liquid (1.08 g, 77% yield). Spectroscopic data match with those previously reported<sup>13</sup>. <sup>1</sup>H NMR (400 MHz, CDCl<sub>3</sub>): δ 7.36 (d, *J* = 8.6 Hz, 2H), 7.25 (d, *J* = 8.8 Hz, 2H), 5.20 – 5.18 (m, 1H), 1.72 (s, *J* = 6.9 Hz, 3H), 0.98 (s, 9H), -0.06 (s, 6H)

**(Z)-Tert-butyl(dimethyl)(pent-2-en-3-yloxy)silane (6n)**

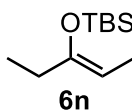

According to the general procedure, the silyl enol ethers **6n** was isolated (petroleum ether as the eluent solvent) as a colorless liquid (0.72 g, 72% yield). Spectroscopic data match with those previously reported<sup>14</sup>. <sup>1</sup>H NMR (400 MHz, CDCl<sub>3</sub>): δ 4.52 – 4.47 (m, 1H), 2.07 – 1.98 (m, 2H), 1.53 – 1.52 (m, 3H), 1.04 – 1.00 (m, 3H), 0.96 (s, 9H), 0.12 (s, 6H).

### III. Optimization of Reaction Conditions

#### Table S1. Optimization of solvents

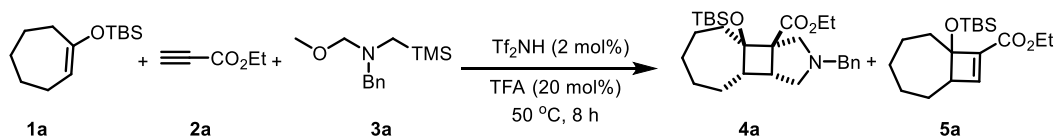

| entry | solvent                  | yield<br>4a/5a |
|-------|--------------------------|----------------|
| 1     | DCM                      | 11% / 52%      |
| 2     | DCE                      | 9% / 69%       |
| 3     | CHCl <sub>3</sub>        | ND             |
| 4     | CCl <sub>4</sub>         | ND             |
| 5     | MeCN                     | ND             |
| 6     | THF                      | ND             |
| 7     | Tol.                     | ND             |
| 8     | CH <sub>3</sub> OH       | ND             |
| 9     | DCM + MeCN               | 10% / 75%      |
| 10    | DCM + THF                | 5% / 69%       |
| 11    | DCM + Tol.               | 14% / 67%      |
| 12    | DCM + CH <sub>3</sub> OH | 9% / 77%       |

Conditions: **1a** (0.165 mmol, 1.1 eq.), **2a** (0.15 mmol, 1.0 eq.), **3a** (0.15 mmol, 1.0 eq.), Tf<sub>2</sub>NH (2 mol%, 0.08 mol in Tol.), TFA (20 mol%), the reaction stir for 8 h at 50 °C. Isolated yield. TFA=Trifluoroacetic acid; DCM= Dichloromethane; DCE=1,2-Dichloroethane; THF=Tetrahydrofuran.

**Table S2. Optimization of 3a equivalents**

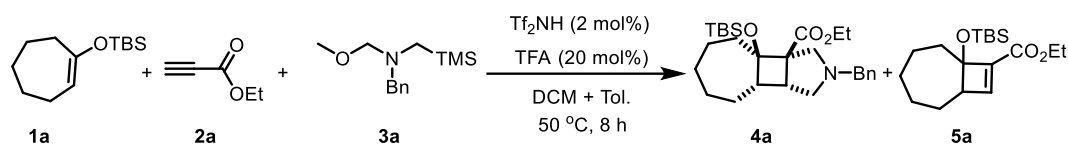

| entry | 3a eq. | yield<br>4a/5a |
|-------|--------|----------------|
| 1     | 1      | 14% / 67%      |
| 2     | 1.5    | 46% / 51%      |
| 3     | 2      | 37% / 36%      |
| 4     | 2.5    | 44% / 21%      |
| 5     | 3      | 82% / 11%      |

Conditions: **1a** (0.165 mmol, 1.1 eq.), **2a** (0.15 mmol, 1.0 eq.), Tf<sub>2</sub>NH (2 mol%, 0.08 mol in Tol.), TFA (20 mol%), DCM(1mL) + Tol.(1mL), the reaction stir for 8 h at 50 °C. Isolated yield.

**Table S3. Optimization of catalysts**

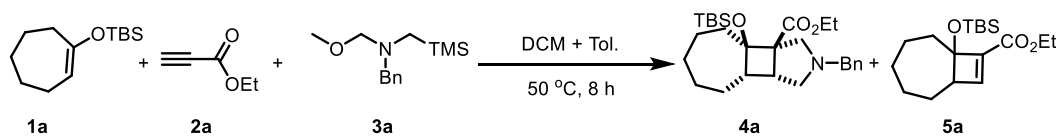

| entry | cat.1(2 mol%)                       | cat.2(20 mol%) | yield<br>4a/5a |
|-------|-------------------------------------|----------------|----------------|
| 1     | Tf <sub>2</sub> NH                  | TFA            | 82% / 11%      |
| 2     | AlCl <sub>3</sub>                   | TFA            | ND             |
| 3     | BF <sub>3</sub> • Et <sub>2</sub> O | TFA            | ND             |
| 4     | Tf <sub>2</sub> NH                  | AcOH           | 20% / 45%      |
| 5     | Tf <sub>2</sub> NH                  | TsOH           | 32% / 41%      |

Conditions: **1a** (0.165 mmol, 1.1 eq.), **2a** (0.15 mmol, 1.0 eq.), **3a** (0.45 mmol, 3.0 eq.), DCM(1mL) + Tol.(1mL), the reaction stir for 8 h at 50 °C. Isolated yield

#### IV. General Procedure for Synthesis of 3-Azabicyclo[3.2.0]heptane

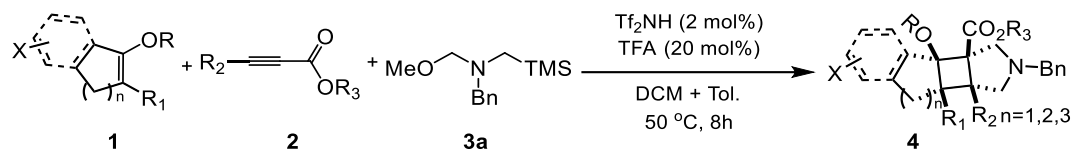

To the reaction tube was added **1** (0.275 mmol), pumped under a double row of tubes for gas exchange three times, under nitrogen atmosphere was added DCM (1 mL), **2** (0.25 mmol), Tf<sub>2</sub>NH (62.5 μL, 0.08 M in Tol.), Tol. (1 mL), TFA (0.05 mmol), **3a** (0.75 mmol), The reaction was carried out at 50 °C for 8 h. The reaction was monitored by TLC until complete consumption of the starting material **1**. Then, the resulting mixture was filtered through celite, and concentrated in vacuo. The crude residue was analyzed by <sup>1</sup>H NMR to determine the diastereoselectivity and then purified via silica gel flash column chromatography to afford the product **4**.

#### Ethyl 7-((tert-butyldimethylsilyl)oxy)bicyclo[5.2.0]non-8-ene-8-carboxylate (**5a**)

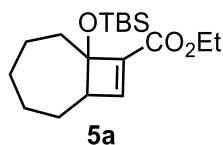

<sup>1</sup>H NMR (400 MHz, CDCl<sub>3</sub>): δ 6.91 (d, *J* = 6.8 Hz, 1H), 4.29 – 4.12 (m, 2H), 2.83 – 2.70 (m, 1H), 2.15 (dd, *J* = 14.0, 8.2 Hz, 1H), 1.89 – 1.50 (m, 6H), 1.33 – 1.27 (m, 6H), 0.92 – 0.85 (s, 9H), 0.12 – -0.03 (s, 6H).

#### Ethyl-2-benzyl-3b-((tert- -butyldimethylsilyl)oxy)decahydrocyclohepta[3,4]

#### Cyclobuta[1,2-c]pyrrole-3a(1H)-carboxylate (**4a**)

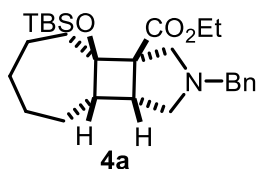

According to the general procedure, the 3-azabicyclo[3.2.0]heptane **4a** was isolated (petroleum ether/EtOAc = 60:1 v/v as the eluent solvent) as a colorless oil (56.4 mg, >20:1 *dr*, 82% yield). <sup>1</sup>H NMR (600 MHz, CDCl<sub>3</sub>): δ 7.34 (d, *J* = 7.1 Hz, 2H), 7.31 – 7.29 (m, 2H), 7.21 – 4.08 (m, 1H), 4.21 – 4.08 (m, 2H), 3.73 (d, *J* = 12.9 Hz,

1H), 3.51 (t,  $J = 10.9$  Hz, 2H), 2.67 (d,  $J = 9.1$  Hz, 1H), 2.43 – 2.36 (m, 2H), 2.27 – 2.15 (m, 2H), 1.86 – 1.72 (m, 2H), 1.71 – 1.56 (m, 4H), 1.46 (s, 1H), 1.42 – 1.29 (m, 3H), 1.27 (t,  $J = 7.1$  Hz, 3H), 0.92 (s, 9H), 0.16 (s, 3H), 0.09 (s, 3H).  $^{13}\text{C}$  NMR (151 MHz,  $\text{CDCl}_3$ ):  $\delta$  174.0, 139.5, 128.8, 128.1, 126.7, 80.1, 60.3, 60.1, 59.7, 58.1, 57.9, 49.6, 31.9, 26.3, 26.1, 24.3, 18.7, 14.3, -1.9, -1.9. IR (KBr):  $\nu$  2933, 1724, 1460, 1363, 1251, 1093, 835  $\text{cm}^{-1}$ . HRMS(APCI) ( $m/z$ ):  $[\text{M}+\text{H}]^+$  Calcd for  $\text{C}_{27}\text{H}_{44}\text{NO}_3\text{Si}$  458.3085; found: 458.3104.

**Ethyl-2-benzyl-3b-((tert-butyldimethylsilyl)oxy)decahydro-3aH-benzo[3,4]cyclobuta[1,2-c]pyrrole-3a-carboxylate (4b)**

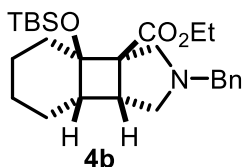

According to the general procedure, the 3-azabicyclo[3.2.0]heptane **4b** was isolated (petroleum ether/EtOAc = 60:1 v/v as the eluent solvent) as a colorless oil (33.6 mg, >20:1 *dr*, 38% yield).  $^1\text{H}$  NMR (600 MHz,  $\text{CDCl}_3$ ):  $\delta$  7.34 (d,  $J = 7.5$  Hz, 2H), 7.31 – 7.28 (m, 2H), 7.24 – 7.22 (m, 1H), 4.19 – 4.14 (m, 1H), 4.12 – 4.06 (m, 1H), 3.65 (t,  $J = 10.2$  Hz, 2H), 3.50 (d,  $J = 10.8$  Hz, 1H), 2.70 (d,  $J = 9.0$  Hz, 1H), 2.53 (t,  $J = 6.9$  Hz, 1H), 2.43 (dd,  $J = 7.6, 4.6$  Hz, 1H), 2.36 – 2.27 (m, 1H), 2.19 (d,  $J = 10.4$  Hz, 1H), 1.81 (d,  $J = 16.1$  Hz, 1H), 1.56 (dt,  $J = 14.2, 8.5$  Hz, 2H), 1.51 – 1.44 (m, 2H), 1.38 (d,  $J = 10.1$  Hz, 1H), 1.35 – 1.27 (m, 2H), 1.25 (t,  $J = 6.9$  Hz, 3H), 0.87 (s, 9H), 0.14 (s, 3H), 0.07 (s, 3H).  $^{13}\text{C}$  NMR (151 MHz,  $\text{CDCl}_3$ ):  $\delta$  174.4, 139.5, 128.6, 128.1, 126.7, 73.2, 62.3, 60.0, 59.7, 57.5, 56.8, 42.2, 37.8, 34.6, 25.8, 23.3, 21.2, 20.5, 18.3, 14.3, -2.5, -2.5. IR (KBr):  $\nu$  2933, 1720, 1458, 1379, 1213, 1091, 833  $\text{cm}^{-1}$ . HRMS(ESI) ( $m/z$ ):  $[\text{M}+\text{Na}]^+$  Calcd for  $\text{C}_{26}\text{H}_{41}\text{NNaO}_3\text{Si}$  466.2748; found: 466.2753.

**Ethyl-2-benzyl-3b-((tert-butyldimethylsilyl)oxy)octahydrocyclopenta[3,4]cyclobuta[1,2-c]pyrrole-3a(1H)-carboxylate (4c)**

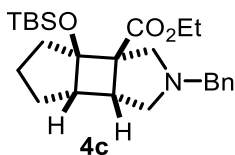

According to the general procedure, the 3-azabicyclo[3.2.0]heptane **4c** was isolated (petroleum ether/EtOAc = 60:1 v/v as the eluent solvent) as a colorless oil (62.4 mg, >20:1 *dr*, 73% yield). <sup>1</sup>H NMR (600 MHz, CDCl<sub>3</sub>): δ 7.36 (d, *J* = 7.1 Hz, 2H), 7.31 – 7.29 (m, 2H), 7.25 – 7.22 (m, 1H), 4.20 – 4.09 (m, 2H), 3.83 (d, *J* = 12.9 Hz, 1H), 3.63 (d, *J* = 9.6 Hz, 1H), 3.39 (d, *J* = 12.9 Hz, 1H), 2.73 (d, *J* = 9.0 Hz, 1H), 2.29 – 2.24 (m, 1H), 2.17 (t, *J* = 4.7 Hz, 1H), 2.14 (d, *J* = 9.6 Hz, 1H), 2.10 (dt, *J* = 9.1, 5.0 Hz, 1H), 1.79 (dd, *J* = 13.9, 4.2 Hz, 1H), 1.75 – 1.66 (m, 3H), 1.64 – 1.58 (m, 1H), 1.51 – 1.48 (m, 1H), 1.26 (t, *J* = 7.1 Hz, 3H), 0.90 (s, 9H), 0.15 (s, 3H), 0.06 (s, 3H). <sup>13</sup>C NMR (151 MHz, CDCl<sub>3</sub>): δ 173.3, 139.4, 128.9, 128.1, 126.7, 82.7, 60.1, 59.9, 59.8, 58.6, 57.9, 48.9, 38.5, 38.3, 31.1, 25.8, 24.3, 18.2, 14.3, -2.5, -2.6. IR (KBr): ν 2950, 1726, 1460, 1361, 1255, 1103, 837 cm<sup>-1</sup>. HRMS(ESI) (*m/z*): [M+Na]<sup>+</sup> Calcd for C<sub>25</sub>H<sub>39</sub>NNaO<sub>3</sub>Si 452.2591; found: 452.2611.

**Ethyl-2-benzyl-3b-((tert-butyldimethylsilyl)oxy)-6a-methyloctahydrocyclopenta[3,4]cyclobuta[1,2-c]pyrrole-3a(1H)-carboxylate (4d)**

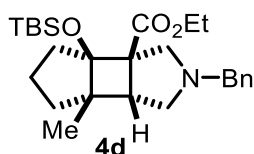

According to the general procedure, the 3-azabicyclo[3.2.0]heptane **4d** was isolated (petroleum ether/EtOAc = 60:1 v/v as the eluent solvent) as a colorless oil (82.2 mg, >20:1 *dr*, 74% yield). <sup>1</sup>H NMR (600 MHz, CDCl<sub>3</sub>): δ 7.36 (d, *J* = 8.4 Hz, 2H), 7.31 – 7.28 (m, 2H), 7.24 – 7.22 (m, 1H), 4.21 – 4.07 (m, 2H), 3.62 (d, *J* = 12.8 Hz, 1H), 3.54 – 3.46 (m, 2H), 2.83 (d, *J* = 9.7 Hz, 1H), 2.28 (d, *J* = 5.7 Hz, 1H), 2.13 (dd, *J* = 9.7, 5.8 Hz, 1H), 2.04 (d, *J* = 9.7 Hz, 1H), 1.89 (s, 1H), 1.65 – 1.60 (m, 3H), 1.59 – 1.54 (m, 1H), 1.41 – 1.34 (m, 1H), 1.26 (t, *J* = 7.1 Hz, 3H), 1.12 (s, 3H), 0.91 (s, 9H), 0.09 (s, 3H), 0.05 (s, 3H). <sup>13</sup>C NMR (151 MHz, CDCl<sub>3</sub>): δ 173.7, 139.7, 128.7, 128.1, 126.7, 84.2, 60.4, 60.1, 60.0, 58.4, 55.4, 47.1, 42.8, 41.0, 38.2, 25.9, 22.4, 18.6, 15.1, 14.3, -1.94, -2.7. IR (KBr): ν 2952, 1726, 1458, 1361, 1255, 1195, 889 cm<sup>-1</sup>. HRMS(APCI) (*m/z*): [M+H]<sup>+</sup> Calcd for C<sub>26</sub>H<sub>42</sub>NO<sub>3</sub>Si 444.2928; found: 444.2922.

**Ethyl-2-benzyl-3b-((tert-butyldimethylsilyl)oxy)-2,3,3b,8,8a,8b-hexahydroindeno[1',2':3,4]cyclobuta[1,2-c]pyrrole-3a(1H)-carboxylate (4e)**



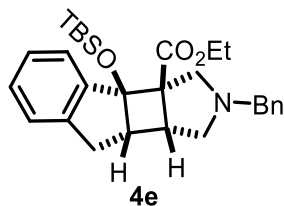

According to the general procedure, the 3-azabicyclo[3.2.0]heptane **4e** was isolated (petroleum ether/EtOAc = 60:1 v/v as the eluent solvent) as a colorless oil (41.7 mg, >20:1 *dr*, 35% yield).  $^1\text{H NMR}$  (600 MHz,  $\text{CDCl}_3$ ):  $\delta$  7.39 (d,  $J = 8.5$  Hz, 2H), 7.32 (t,  $J = 7.6$  Hz, 2H), 7.25 – 7.18 (m, 4H), 7.14 (t,  $J = 7.3$  Hz, 1H), 3.92 – 3.81 (m, 4H), 3.51 (d,  $J = 12.7$  Hz, 1H), 3.21 (dd,  $J = 16.8, 8.0$  Hz, 1H), 2.86 (d,  $J = 9.0$  Hz, 1H), 2.77 (d,  $J = 16.8$  Hz, 1H), 2.71 (dd,  $J = 7.9, 4.7$  Hz, 1H), 2.27 – 2.21 (m, 2H), 2.16 (dd,  $J = 9.1, 4.7$  Hz, 1H), 1.08 (t,  $J = 7.1$  Hz, 3H), 0.87 (s, 9H), -0.10 (s, 3H), -0.41 (s, 3H).  $^{13}\text{C NMR}$  (151 MHz,  $\text{CDCl}_3$ ):  $\delta$  172.9, 144.6, 143.3, 139.4, 128.9, 128.6, 128.1, 126.7, 126.3, 125.7, 125.1, 84.1, 63.9, 60.1, 59.9, 58.7, 57.1, 46.7, 41.1, 37.8, 29.7, 25.8, 18.1, 14.0, -3.7, -3.8. **IR** (KBr):  $\nu$  2924, 1724, 1460, 1369, 1255, 1109, 873  $\text{cm}^{-1}$ . **HRMS(ESI)** ( $m/z$ ):  $[\text{M}+\text{H}]^+$  Calcd for  $\text{C}_{29}\text{H}_{40}\text{NO}_3\text{Si}$  478.2772; found: 478.2775.

**Ethyl-2-benzyl-7-bromo-3b-((tert-butyldimethylsilyl)oxy)-2,3,3b,8,8a,8b-hexahydroindeno[1',2':3,4]cyclobuta[1,2-c]pyrrole-3a(1H)-carboxylate (4f)**

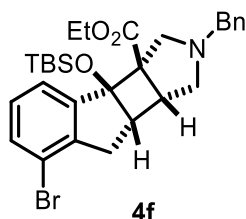

According to the general procedure, the 3-azabicyclo[3.2.0]heptane **4f** was isolated (petroleum ether/EtOAc = 60:1 v/v as the eluent solvent) as a colorless oil (58.6 mg, >20:1 *dr*, 42% yield).  $^1\text{H NMR}$  (400 MHz,  $\text{CDCl}_3$ ):  $\delta$  7.42 – 7.35 (m, 3H), 7.32 (t,  $J = 7.2$  Hz, 2H), 7.27 (d,  $J = 6.1$  Hz, 1H), 7.19 (d,  $J = 7.6$  Hz, 1H), 7.05 (t,  $J = 7.7$  Hz, 1H), 3.96 – 3.75 (m, 4H), 3.51 (d,  $J = 12.7$  Hz, 1H), 3.15 (dd,  $J = 17.5, 8.0$  Hz, 1H), 2.88 – 2.84 (m, 1H), 2.76 – 2.69 (m, 1H), 2.29 (t,  $J = 4.6$  Hz, 1H), 2.22 (d,  $J = 10.0$  Hz, 1H), 2.17 (dd,  $J = 9.2, 4.6$  Hz, 1H), 1.59 (s, 1H), 1.09 (t,  $J = 7.1$  Hz, 3H), 0.86 (s, 9H), -0.07 (s, 3H), -0.41 (s, 3H).  $^{13}\text{C NMR}$  (151 MHz,  $\text{CDCl}_3$ ):  $\delta$  172.6, 146.9, 143.9, 139.3, 131.7, 128.9, 128.4, 128.2, 126.9, 124.7, 120.5, 85.2, 64.0, 60.2, 59.9, 58.7, 57.0, 45.9,

41.2, 39.67, 25.7, 14.1 -3.6, -3.8. **IR** (KBr):  $\nu$  2945, 1728, 1454, 1365, 1261, 1109, 877, 777, 466  $\text{cm}^{-1}$ . **HRMS(ESI)** ( $m/z$ ):  $[M+H]^+$  Calcd for  $\text{C}_{29}\text{H}_{39}\text{BrNO}_3\text{Si}$  556.1877; found: 556.1869.

**Ethyl-8-benzyl-9b-((tert-butyldimethylsilyl)oxy)-5,6,6a,6b,7,8,9b-octahydro-9aH-naphtho[1',2':3,4]cyclobuta[1,2-c]pyrrole-9a-carboxylate (4g)**

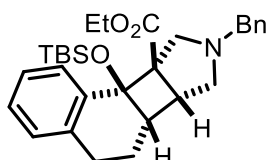

**4g**

According to the general procedure, the 3-azabicyclo[3.2.0]heptane **4g** isolated (petroleum ether/EtOAc = 60:1 v/v as the eluent solvent) as a colorless oil (69.5 mg, >20:1 *dr*, 71% yield).  **$^1\text{H NMR}$**  (600 MHz,  $\text{CDCl}_3$ ):  $\delta$  7.43 – 7.40 (m, 1H), 7.39 – 7.35 (m, 2H), 7.31 – 7.28 (m, 2H), 7.24 – 7.21 (m, 1H), 7.10 – 7.05 (m, 2H), 7.04 – 6.99 (m, 1H), 3.85 (dd,  $J = 21.8, 11.4$  Hz, 2H), 3.52 – 3.43 (m, 3H), 2.95 – 2.82 (m, 2H), 2.75 (d,  $J = 9.1$  Hz, 1H), 2.69 – 2.62 (m, 2H), 2.30 (d,  $J = 10.1$  Hz, 1H), 2.11 – 2.08 (m, 1H), 1.71 – 1.65 (m, 1H), 1.64 – 1.53 (m, 1H), 0.91 (d,  $J = 7.0$  Hz, 9H), 0.89 (d,  $J = 7.2$  Hz, 3H), 0.04 (s, 3H), -0.37 (s, 3H).  **$^{13}\text{C NMR}$**  (151 MHz,  $\text{CDCl}_3$ ):  $\delta$  172.4, 139.4, 138.8, 136.9, 128.9, 128.6, 128.1, 127.7, 126.8, 126.7, 125.3, 72.6, 64.2, 60.0, 59.9, 58.2, 57.1, 43.9, 39.1, 34.4, 29.7, 26.0, 23.2, 21.0, 18.4, 13.7, -2.5, -3.3. **IR** (KBr):  $\nu$  2933, 1724, 1460, 1367, 1255, 1176, 1091, 833  $\text{cm}^{-1}$ . **HRMS(ESI)** ( $m/z$ ):  $[M+\text{Na}]^+$  Calcd for  $\text{C}_{30}\text{H}_{41}\text{NNaO}_3\text{Si}$  514.2748; found: 514.2756.

**Ethyl-2-benzyl-3b-((tert-butyldimethylsilyl)oxy)-6-phenyldecahydro-3aH-benzo[3,4]cyclobuta[1,2-c]pyrrole-3a-carboxylate (4h)**

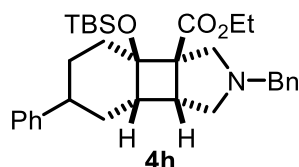

According to the general procedure, the 3-azabicyclo[3.2.0]heptane **4h** was isolated (petroleum ether/EtOAc = 60:1 v/v as the eluent solvent) as a colorless oil (35.5 mg,

1.1:1 *dr*, 27% yield).  $^1\text{H NMR}$  (600 MHz,  $\text{CDCl}_3$ ):  $\delta$  7.19\* (dd,  $J = 16.0, 8.3$  Hz, 2H), 7.16 – 7.09\* (m, 4H), 7.09 – 7.04\* (m, 1H), 7.04 – 6.98\* (m, 3H), 4.06 – 3.91\* (m, 2H), 3.51 – 3.47\* (m, 2H), 3.36\* (dd,  $J = 10.4, 6.0$  Hz, 1H), 2.65 – 2.57\* (m, 2H), 2.41\* (dd,  $J = 8.1, 4.2$  Hz, 1H), 2.31 – 2.11\* (m, 2H), 2.04\* (dd,  $J = 43.0, 10.3$  Hz, 1H), 1.91 – 1.81\* (m, 1H), 1.76 – 1.24\* (m, 5H), 1.13 – 1.07\* (m, 3H), 0.76\* (d,  $J = 35.1$  Hz, 9H), 0.01\* (d,  $J = 10.7$  Hz, 3H), -0.03\* (s, 1H), -0.09\* (s, 2H).  $^{13}\text{C NMR}$  (151 MHz,  $\text{CDCl}_3$ ):  $\delta$  174.4, 173.8, 148.2, 147.3, 139.5, 139.4, 128.6, 128.6, 128.4, 128.4, 128.1, 126.8, 126.8, 126.7, 125.9, 125.7, 74.3, 72.3, 62.3, 60.2, 60.1, 59.6, 59.6, 58.4, 57.3, 57.3, 56.4, 45.6, 42.7, 41.8, 40.3, 37.8, 36.5, 36.1, 32.3, 31.7, 28.5, 28.5, 27.5, 25.9, 25.8, 18.5, 18.3, 14.4, 14.3, -2.4, -2.4, -2.5. **IR** (KBr):  $\nu$  2935, 1726, 1458, 1367, 1257, 1126, 835  $\text{cm}^{-1}$ . **HRMS(ESI)** ( $m/z$ ):  $[\text{M}+\text{Na}]^+$  Calcd for  $\text{C}_{32}\text{H}_{45}\text{NNaO}_3\text{Si}$  542.3061; found: 542.3088.

**Ethyl-2-benzyl-6-(tert-butyl)-3b-((tert-butyldimethylsilyl)oxy)decahydro-3aH-benzo[3,4]cyclobuta[1,2-c]pyrrole-3a-carboxylate (4i)**

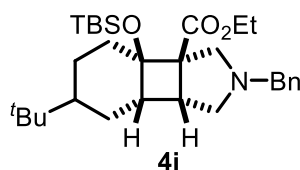

According to the general procedure, the 3-azabicyclo[3.2.0]heptane **4i** was isolated (petroleum ether/EtOAc = 60:1 v/v as the eluent solvent) as a colorless oil (61.1 mg, 1.3:1 *dr*, 49% yield).  $^1\text{H NMR}$  (600 MHz,  $\text{CDCl}_3$ ):  $\delta$  7.40 – 7.20\* (m, 5H), 4.21 – 4.05\* (m, 2H), 3.71 – 3.58\* (m, 2H), 3.49\* (dd,  $J = 17.2, 10.3$  Hz, 1H), 2.80 – 2.63\* (m, 1H), 2.47 – 1.84\* (m, 4H), 1.82 – 1.46\* (m, 4H), 1.46 – 1.21\* (m, 5H), 1.12 – 0.98\* (m, 1H), 0.96 – 0.78\* (m, 18H), 0.14\* (d,  $J = 9.4$  Hz, 3H), 0.08\* (s, 1H), 0.02\* (s, 2H).  $^{13}\text{C NMR}$  (151 MHz,  $\text{CDCl}_3$ ):  $\delta$  174.5, 173.9, 139.6, 128.6, 128.6, 128.1, 126.7, 74.5, 72.8, 62.2, 61.9, 60.1, 60.0, 59.7, 59.7, 58.5, 57.4, 56.6, 46.0, 43.5, 42.7, 41.7, 40.1, 37.9, 32.6, 32.4, 28.7, 27.2, 26.9, 26.1, 25.9, 25.8, 24.7, 22.2, 20.0, 18.5, 18.3, -2.4. **IR** (KBr):  $\nu$  2950, 1728, 1467, 1373, 1255, 1128, 839  $\text{cm}^{-1}$ . **HRMS(ESI)** ( $m/z$ ):  $[\text{M}+\text{Na}]^+$  Calcd for  $\text{C}_{30}\text{H}_{49}\text{NNaO}_3\text{Si}$  522.3374; found: 522.3368.

**Ethyl-2-benzyl-3b-((tert-butyldimethylsilyloxy)-6,6-difluorodecahydro-3aH-benzo[3,4]cyclobuta[1,2-c]pyrrole-3a-carboxylate (4j)**

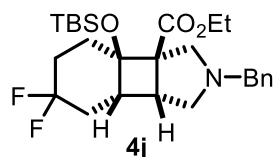

According to the general procedure, the 3-azabicyclo[3.2.0]heptane **4j** was isolated (petroleum ether/EtOAc = 60:1 v/v as the eluent solvent) as a colorless oil (44.6 mg, >20:1 *dr*, 37% yield). **<sup>1</sup>H NMR** (600 MHz, CDCl<sub>3</sub>): δ 7.33 – 7.29 (m, 4H), 7.27 – 7.22 (m, 1H), 4.21 – 4.08 (m, 2H), 3.67 – 3.61 (m, 2H), 3.50 (d, *J* = 10.5 Hz, 1H), 2.75 (dd, *J* = 8.8, 5.2 Hz, 2H), 2.57 – 2.45 (m, 1H), 2.30 (dd, *J* = 9.2, 4.3 Hz, 1H), 2.19 (d, *J* = 10.5 Hz, 1H), 1.92 (s, 6H), 1.26 (t, *J* = 7.1 Hz, 3H), 0.87 (s, 9H), 0.14 (s, 3H), 0.07 (s, 3H). **<sup>13</sup>C NMR** (151 MHz, CDCl<sub>3</sub>): δ 173.7, 139.2, 128.7, 128.2, 126.9, 72.2, 61.6, 60.4, 59.5, 57.3 (d, *J* = 83.1 Hz), 41.2 (d, *J* = 8.5 Hz), 39.3, 32.5 (t, *J* = 24.3 Hz), 31.2, 29.6 (t, *J* = 24.5 Hz), 25.7, 18.3, 14.3, -2.5 (d, *J* = 37.4 Hz). **<sup>19</sup>F NMR** (565 MHz, CDCl<sub>3</sub>): δ -86.06 (d, *J* = 246.7 Hz), -92.84 (d, *J* = 235.6 Hz). **IR** (KBr): ν 2945, 1728, 1461, 1371, 1255, 1101, 1039, 846 cm<sup>-1</sup>. **HRMS(APCI)** (*m/z*): [M+H]<sup>+</sup> Calcd for C<sub>26</sub>H<sub>40</sub>F<sub>2</sub>NO<sub>3</sub>Si 480.2740; found: 480.2748.

**Ethyl-2-benzyl-3b-((trimethylsilyloxy)decahydrocyclohepta[3,4]cyclobuta[1,2-c]pyrrole-3a(1H)-carboxylate (4k)**

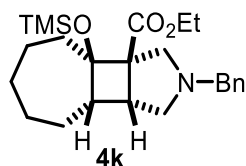

According to the general procedure, the 3-azabicyclo[3.2.0]heptane **4k** was isolated (petroleum ether/EtOAc = 60:1 v/v as the eluent solvent) as a colorless oil (72.0 mg, >20:1 *dr*, 69% yield). **<sup>1</sup>H NMR** (600 MHz, CDCl<sub>3</sub>): δ 7.37 (d, *J* = 8.4 Hz, 2H), 7.32 – 7.30 (m, 2H), 7.25 – 7.23 (m, 1H), 4.16 – 4.11 (m, 2H), 3.71 (d, *J* = 13.0 Hz, 1H), 3.57 (d, *J* = 13.1 Hz, 1H), 3.41 (d, *J* = 10.2 Hz, 1H), 2.70 (d, *J* = 9.1 Hz, 1H), 2.31 (s, 2H), 2.22 – 2.18 (m, 2H), 1.85 – 1.78 (m, 1H), 1.77 – 1.65 (m, 4H), 1.65 – 1.52 (m, 2H), 1.26 (t, *J* = 7.1 Hz, 6H), 0.15 (s, 9H). **<sup>13</sup>C NMR** (151 MHz, CDCl<sub>3</sub>): δ 172.1, 137.6, 127.0, 126.4, 124.9, 79.1, 58.4, 57.9, 56.6, 56.2, 48.3, 37.6, 33.4, 29.9, 25.3, 22.9 12.6.

**IR** (KBr):  $\nu$  2927, 1724, 1450, 1361, 1251, 1087, 839  $\text{cm}^{-1}$ . **HRMS(ESI)** ( $m/z$ ):  $[\text{M}+\text{H}]^+$   
Calcd for  $\text{C}_{24}\text{H}_{38}\text{NO}_3\text{Si}$  416.2615; found: 416.2619.

**Ethyl-2-benzyl-3b-((triethylsilyl)oxy)decahydrocyclohepta[3,4]cyclobuta[1,2-c]pyrrole-3a(1H)-carboxylate (4l)**

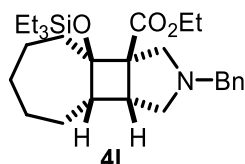

According to the general procedure, the 3-azabicyclo[3.2.0]heptane **4l** was isolated (petroleum ether/EtOAc = 60:1 v/v as the eluent solvent) as a colorless oil (71.2 mg, >20:1 *dr*, 62% yield).  **$^1\text{H}$  NMR** (600 MHz,  $\text{CDCl}_3$ ):  $\delta$  7.29 (d,  $J = 8.5$  Hz, 2H), 7.25 – 7.23 (m, 2H), 7.18 – 7.16 (m, 1H), 4.13 – 4.00 (m, 2H), 3.69 (d,  $J = 12.9$  Hz, 1H), 3.42 (t,  $J = 11.1$  Hz, 2H), 2.61 (d,  $J = 9.1$  Hz, 1H), 2.31 (s, 2H), 2.11 (d,  $J = 9.7$  Hz, 2H), 1.76 – 1.67 (m, 2H), 1.61 – 1.49 (m, 4H), 1.42 (s, 1H), 1.26 (d,  $J = 10.0$  Hz, 3H), 1.19 (t,  $J = 7.1$  Hz, 3H), 0.91 (t,  $J = 7.9$  Hz, 9H), 0.58 (q,  $J = 7.9$  Hz, 6H).  **$^{13}\text{C}$  NMR** (151 MHz,  $\text{CDCl}_3$ ):  $\delta$  173.9, 139.5, 128.7, 128.1, 126.7, 80.4, 60.1, 60.1, 59.7, 58.1, 58.0, 50.0, 38.6, 35.9, 31.9, 26.6, 24.3, 14.3, 7.2, 6.8. **IR** (KBr):  $\nu$  2925, 1724, 1452, 1365, 1218, 1087, 732  $\text{cm}^{-1}$ . **HRMS(APCI)** ( $m/z$ ):  $[\text{M}+\text{H}]^+$  Calcd for  $\text{C}_{27}\text{H}_{44}\text{NO}_3\text{Si}$  458.3085; found: 458.3104.

**Ethyl-2-benzyl-3b-((triisopropylsilyl)oxy)decahydrocyclohepta[3,4]cyclobuta[1,2-c]pyrrole-3a(1H)-carboxylate (4m)**

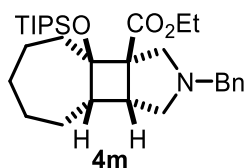

According to the general procedure, the 3-azabicyclo[3.2.0]heptane **4m** was isolated (petroleum ether/EtOAc = 60:1 v/v as the eluent solvent) as a colorless oil (91.0 mg, >20:1 *dr*, 73% yield).  **$^1\text{H}$  NMR** (600 MHz,  $\text{CDCl}_3$ ):  $\delta$  7.40 – 6.94 (m, 5H), 4.14 – 3.98 (m, 2H), 3.73 (d,  $J = 12.8$  Hz, 1H), 3.57 (d,  $J = 9.9$  Hz, 1H), 3.34 (d,  $J = 12.8$  Hz, 1H), 2.66 – 2.42 (m, 3H), 2.14 – 1.88 (m, 3H), 1.59 (dq,  $J = 15.9, 7.3, 5.9$  Hz, 3H), 1.53 – 1.35 (m, 4H), 1.29 – 1.14 (m, 6H), 1.06 – 0.96 (m, 20H).  **$^{13}\text{C}$  NMR** (151 MHz,  $\text{CDCl}_3$ ):

$\delta$  174.4, 139.5, 128.8, 128.0, 126.7, 80.6, 60.1, 59.9, 59.6, 58.7, 57.7, 49.5, 38.0, 36.9, 32.2, 25.7, 23.6, 18.4, 14.3, 13.9. **IR** (KBr):  $\nu$  2929, 1726, 1498, 1379, 1255, 1126, 887, 676  $\text{cm}^{-1}$ . **HRMS(ESI)** ( $m/z$ ):  $[\text{M}+\text{Na}]^+$  Calcd for  $\text{C}_{30}\text{H}_{49}\text{NNaO}_3\text{Si}$  522.3374; found: 522.3368.

**Methyl-2-benzyl-3b-((tert-butyldimethylsilyl)oxy)decahydrocyclohepta[3,4]cyclobuta[1,2-c]pyrrole-3a(1H)-carboxylate (4n)**

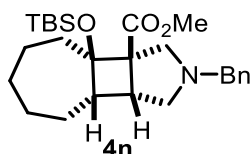

According to the general procedure, the 3-azabicyclo[3.2.0]heptane **4n** was isolated (petroleum ether/EtOAc = 60:1 v/v as the eluent solvent) as a colorless oil (89.9 mg, >20:1 *dr*, 81% yield).  **$^1\text{H}$  NMR** (600 MHz,  $\text{CDCl}_3$ ):  $\delta$  7.35 (d,  $J$  = 8.0 Hz, 2H), 7.32 – 7.29 (m, 2H), 7.25 – 7.23 (m, 1H), 3.74 (d,  $J$  = 12.9 Hz, 1H), 3.68 (s, 3H), 3.52 (dd,  $J$  = 15.0, 12.4 Hz, 2H), 2.68 (d,  $J$  = 9.0 Hz, 1H), 2.41 (d,  $J$  = 11.9 Hz, 2H), 2.22 (d,  $J$  = 10.5 Hz, 2H), 1.81 – 1.76 (m, 2H), 1.65 (dd,  $J$  = 13.8, 9.5 Hz, 4H), 1.45 – 1.29 (m, 4H), 0.93 (s, 9H), 0.17 (s, 3H), 0.10 (s, 3H).  **$^{13}\text{C}$  NMR** (151 MHz,  $\text{CDCl}_3$ ):  $\delta$  174.4, 139.3, 128.8, 128.1, 126.7, 80.0, 60.3, 59.7, 57.9, 57.8, 51.3, 49.5, 38.9, 35.9, 31.8, 26.2, 26.1, 24.1, 18.6, -1.9, -2.0. **IR** (KBr):  $\nu$  2927, 1730, 1461, 1355, 1257, 1120, 833  $\text{cm}^{-1}$ . **HRMS(ESI)** ( $m/z$ ):  $[\text{M}+\text{H}]^+$  Calcd for  $\text{C}_{26}\text{H}_{42}\text{NO}_3\text{Si}$  444.2928; found: 444.2922.

**Diethyl-2-benzyl-3b-((tert-butyldimethylsilyl)oxy)octahydrocyclohepta[3,4]cyclobuta[1,2-c]pyrrole-3a,8b(1H,3bH)-dicarboxylate (4o)**

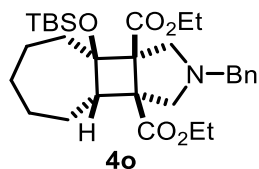

According to the general procedure, the 3-azabicyclo[3.2.0]heptane **4o** was isolated (petroleum ether/EtOAc = 60:1 v/v as the eluent solvent) as a colorless oil (61.0 mg, >20:1 *dr*, 46% yield).  **$^1\text{H}$  NMR** (600 MHz,  $\text{CDCl}_3$ ):  $\delta$  7.38 – 7.29 (m, 4H), 7.27 – 7.22 (m, 1H), 4.23 – 4.03 (m, 4H), 3.74 (d,  $J$  = 12.7 Hz, 1H), 3.63 (d,  $J$  = 9.7 Hz, 1H), 3.49 (d,  $J$  = 12.7 Hz, 1H), 2.92 (d,  $J$  = 9.4 Hz, 1H), 2.81 (dd,  $J$  = 12.2, 7.2 Hz, 1H), 2.53

(d,  $J = 9.4$  Hz, 1H), 2.32 (d,  $J = 9.7$  Hz, 1H), 2.30 – 2.24 (m, 2H), 1.93 – 1.77 (m, 1H), 1.73 – 1.64 (m, 3H), 1.60 (s, 2H), 1.23 (dt,  $J = 11.4, 7.0$  Hz, 8H), 0.94 (s, 9H), 0.16 (s, 3H), 0.00 (s, 3H).  $^{13}\text{C}$  NMR (151 MHz,  $\text{CDCl}_3$ ):  $\delta$  174.1, 173.7, 141.0, 130.7, 130.2, 128.8, 82.4, 63.6, 62.4, 62.2, 61.9, 61.5, 61.4, 56.9, 54.6, 35.2, 33.9, 30.5, 28.7, 28.1, 27.5, 20.8, 16.2, 16.0. IR (KBr):  $\nu$  2923, 1624, 1498, 1258, 1078, 833  $\text{cm}^{-1}$ . HRMS(APCI) ( $m/z$ ):  $[\text{M}+\text{H}]^+$  Calcd for  $\text{C}_{30}\text{H}_{48}\text{NO}_5\text{Si}$  530.3296; found: 530.3334.

**Dimethyl-2-benzyl-3b-((tert-butyldimethylsilyl)oxy)octahydrocyclohepta  
[3,4]cyclobuta[1,2-c]pyrrole-3a,8b(1H,3bH)-dicarboxylate (4p)**

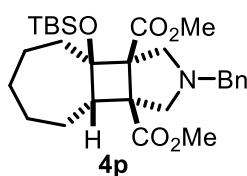

According to the general procedure, the 3-azabicyclo[3.2.0]heptane **4p** was isolated (petroleum ether/EtOAc = 60:1 v/v as the eluent solvent) as a colorless oil (51.6 mg, >20:1 *dr*, 41% yield).  $^1\text{H}$  NMR (600 MHz,  $\text{CDCl}_3$ ):  $\delta$  7.21 – 7.15 (m, 4H), 7.11 (d,  $J = 6.6$  Hz, 1H), 3.59 (s, 3H), 3.45 (d,  $J = 1.3$  Hz, 2H), 3.43 (s, 3H), 3.08 (dd,  $J = 12.8, 5.4$  Hz, 1H), 3.03 (d,  $J = 10.4$  Hz, 1H), 2.74 (d,  $J = 9.8$  Hz, 1H), 2.56 (d,  $J = 9.8$  Hz, 1H), 2.16 – 2.10 (m, 2H), 1.76 – 1.61 (m, 3H), 1.44 (d,  $J = 1.8$  Hz, 3H), 1.42 – 1.37 (m, 1H), 1.11 (s, 2H), 0.66 (s, 9H), 0.10 (s, 3H), -0.00 (s, 3H).  $^{13}\text{C}$  NMR (151 MHz,  $\text{CDCl}_3$ ):  $\delta$  173.4, 169.9, 138.8, 128.7, 128.3, 127.2, 82.2, 66.8, 59.9, 57.8, 57.7, 52.1, 51.5, 50.4, 49.5, 32.9, 31.9, 29.7, 27.5, 26.5, 25.9, 24.1, 18.7, -2.5. IR (KBr):  $\nu$  2929, 1724, 1498, 1263, 1091, 833  $\text{cm}^{-1}$ . HRMS(APCI) ( $m/z$ ):  $[\text{M}+\text{H}]^+$  Calcd for  $\text{C}_{28}\text{H}_{44}\text{NO}_5\text{Si}$  502.2983; found: 502.2993.

**Ethyl-3-benzyl-7-((tert-butyldimethylsilyl)oxy)-7-phenyl-3-  
azabicyclo[3.2.0]heptane-1-carboxylate (7a)**

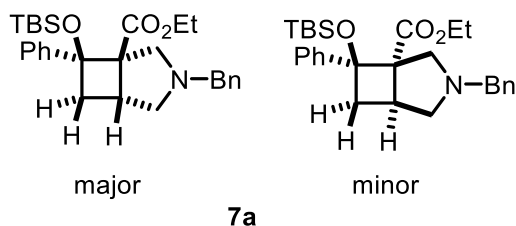

According to the general procedure, the 3-azabicyclo[3.2.0]heptane **7a** was isolated

(petroleum ether/EtOAc = 60:1 v/v as the eluent solvent) as a colorless oil (44 mg, 1.3:1 *dr*, 63% yield). <sup>1</sup>H NMR (600 MHz, CDCl<sub>3</sub>): (major) δ 7.59 (d, *J* = 7.0 Hz, 2H), 7.37 – 7.34 (m, 2H), 7.33 – 7.29 (m, 1H), 7.12 – 7.10 (m, 3H), 6.92 – 6.90 (m, 2H), 4.26 – 4.14 (m, 2H), 3.64 (d, *J* = 13.8 Hz, 1H), 3.39 – 3.33 (m, 1H), 3.24 (d, *J* = 13.8 Hz, 1H), 2.89 (dd, *J* = 12.7, 6.2 Hz, 1H), 2.82 (d, *J* = 9.1 Hz, 1H), 2.69 (d, *J* = 10.6 Hz, 1H), 2.35 (dd, *J* = 12.7, 9.5 Hz, 1H), 2.24 (dd, *J* = 9.2, 5.1 Hz, 1H), 1.86 (d, *J* = 10.6 Hz, 1H), 1.31 (t, *J* = 7.1 Hz, 3H), 0.83 (s, 9H), -0.08 (s, 3H), -0.45 (s, 3H). <sup>13</sup>C NMR (151 MHz, CDCl<sub>3</sub>): (major) δ 172.1, 141.4, 139.3, 127.9, 127.9, 127.7, 127.6, 127.3, 126.4, 80.5, 64.4, 60.3, 59.3, 59.0, 58.1, 35.0, 33.7, 25.6, 17.9, 14.3, -3.1, -3.4. <sup>1</sup>H NMR (600 MHz, CDCl<sub>3</sub>): (minor) δ 7.44 – 7.41 (m, 2H), 7.35 (d, *J* = 6.5 Hz, 2H), 7.30 – 7.27 (m, 2H), 7.26 – 7.21 (m, 3H), 7.18 – 7.13 (t, 1H), 3.80 (dd, *J* = 14.4, 11.5 Hz, 2H), 3.55 – 3.43 (m, 3H), 2.87 – 2.83 (m, 1H), 2.78 – 2.70 (m, 2H), 2.50 (dd, *J* = 12.3, 7.4 Hz, 1H), 2.25 (d, *J* = 10.3 Hz, 1H), 2.11 (dd, *J* = 9.1, 4.5 Hz, 1H), 0.92 (s, 9H), 0.82 (t, *J* = 7.1 Hz, 3H), 0.00 (s, 3H), -0.25 (s, 3H). <sup>13</sup>C NMR (151 MHz, CDCl<sub>3</sub>): (minor) δ 172.6, 144.1, 139.2, 129.0, 128.1, 127.4, 127.0, 126.8, 126.4, 76.3, 65.5, 59.9, 59.9, 58.2, 56.7, 36.7, 33.3, 26.1, 18.5, 13.7, -2.6, -2.8. IR (KBr): ν 2949, 1732, 1454, 1369, 1265, 1199, 999, 833 cm<sup>-1</sup>. HRMS(ESI) (*m/z*): [M+Na]<sup>+</sup> Calcd for C<sub>28</sub>H<sub>39</sub>NNaO<sub>3</sub>Si 488.2591; found: 488.2603.

**Ethyl-3-benzyl-7-((tert-butyldimethylsilyl)oxy)-7-(3-fluorophenyl)-3-azabicyclo[3.2.0]heptane-1-carboxylate (7b)**

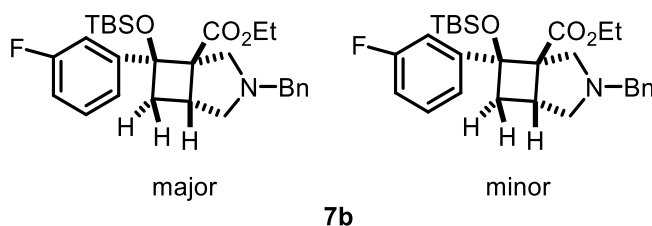

According to the general procedure, the 3-azabicyclo[3.2.0]heptane **7b** was isolated (petroleum ether/EtOAc = 60:1 v/v as the eluent solvent) as a colorless oil (52.6 mg, 2.3:1 *dr*, 44% yield). <sup>1</sup>H NMR (600 MHz, CDCl<sub>3</sub>): (major) δ 7.39 – 7.27 (m, 3H), 7.19 – 7.11 (m, 3H), 7.00 – 6.98 (m, 3H), 4.27 – 4.13 (m, 2H), 3.64 (d, *J* = 13.5 Hz, 1H), 3.35 – 3.33 (m, 1H), 3.24 (d, *J* = 13.5 Hz, 1H), 2.83 (dd, *J* = 8.0, 3.8 Hz, 1H), 2.59 (d, *J* =



10.7 Hz, 1H), 2.34 (dd,  $J = 12.8, 9.4$  Hz, 1H), 2.23 (dd,  $J = 9.2, 5.0$  Hz, 1H), 1.87 (d,  $J = 10.6$  Hz, 1H), 1.60 (d,  $J = 3.6$  Hz, 1H), 1.31 (t,  $J = 7.2$  Hz, 3H), 0.84 (s, 9H), -0.06 (s, 3H), -0.39 (s, 3H).  $^{13}\text{C NMR}$  (151 MHz,  $\text{CDCl}_3$ ): (major)  $\delta$  171.7, 163.3 (d,  $J = 244.6$  Hz), 144.3 (d,  $J = 6.0$  Hz), 139.1, 129.0 (d,  $J = 7.6$  Hz), 127.9 (d,  $J = 12.0$  Hz), 126.6, 123.4, 114.9 (d,  $J = 21.1$  Hz), 114.2 (d,  $J = 21.1$  Hz), 64.4, 60.4, 59.2, 59.1, 57.9, 35.0, 33.7, 29.7, 25.6, 18.0, 14.2, -3.1, -3.4.  $^{19}\text{F NMR}$  (565 MHz,  $\text{CDCl}_3$ ): (major)  $\delta$  -113.9.  $^1\text{H NMR}$  (400 MHz,  $\text{CDCl}_3$ ): (minor)  $\delta$  7.40 – 7.29 (m, 4H), 7.28 – 7.17 (m, 4H), 6.96 – 6.84 (m, 1H), 3.85 – 3.77 (m, 2H), 3.66 – 3.49 (m, 3H), 2.92 – 2.84 (m, 1H), 2.79 (d,  $J = 9.2$  Hz, 1H), 2.70 (dd,  $J = 12.3, 8.4$  Hz, 1H), 2.56 (dd,  $J = 12.3, 7.5$  Hz, 1H), 2.27 (d,  $J = 10.4$  Hz, 1H), 2.15 (dd,  $J = 9.2, 4.5$  Hz, 1H), 0.95 (s, 9H), 0.90 (t,  $J = 7.2$  Hz, 3H), 0.06 (s, 3H), -0.20 (s, 3H).  $^{13}\text{C NMR}$  (151 MHz,  $\text{CDCl}_3$ ): (minor)  $\delta$  172.4, 163.2 (d,  $J = 244.6$  Hz), 147.3 (d,  $J = 6.0$  Hz), 139.1, 129.1, 128.9 (d,  $J = 7.55$  Hz), 128.1, 126.9, 121.7 (d,  $J = 15.1$  Hz), 113.9 (d,  $J = 22.6$  Hz, 1H), 65.3, 60.1, 59.9, 58.1, 56.7, 36.7, 33.3, 29.7, 26.1, 18.4, 13.7, -2.6, -2.9.  $^{19}\text{F NMR}$  (565 MHz,  $\text{CDCl}_3$ ): (minor)  $\delta$  -114.1. **IR** (KBr):  $\nu$  2929, 1728, 1627, 1454, 1365, 1261, 1047, 688, 459  $\text{cm}^{-1}$ . **HRMS(ESI)** ( $m/z$ ):  $[\text{M}+\text{Na}]^+$  Calcd for  $\text{C}_{28}\text{H}_{38}\text{FNNaO}_3\text{Si}$  506.2497; found: 506.2496.

**Ethyl-3-benzyl-7-((tert-butyldimethylsilyl)oxy)-7-(4-fluorophenyl)-3-azabicyclo[3.2.0]heptane-1-carboxylate (7c)**

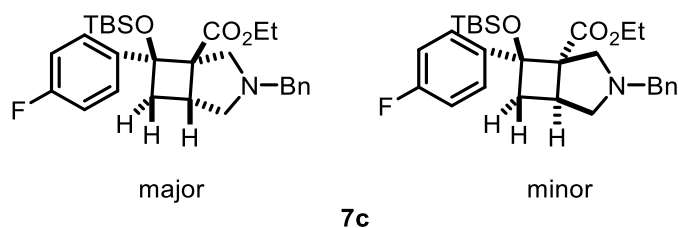

According to the general procedure, the 3-azabicyclo[3.2.0]heptane **7c** was isolated (petroleum ether/EtOAc = 60:1 v/v as the eluent solvent) as a colorless oil (37.3 mg, 1.2:1 *dr*, 31% yield).  $^1\text{H NMR}$  (600 MHz,  $\text{CDCl}_3$ ): (major)  $\delta$  7.56 – 7.54 (m, 2H), 7.18 – 7.11 (m, 3H), 7.05 – 7.02 (m, 2H), 6.94 – 6.88 (m, 2H), 4.28 – 4.10 (m, 2H), 3.64 (d,  $J = 13.6$  Hz, 1H), 3.33 (dt,  $J = 10.3, 5.6$  Hz, 1H), 3.22 (d,  $J = 13.6$  Hz, 1H), 2.82 (q,  $J = 5.3$  Hz, 2H), 2.60 (d,  $J = 10.6$  Hz, 1H), 2.35 (dd,  $J = 12.7, 9.5$  Hz, 1H), 2.23 (dd,  $J = 9.2, 5.1$  Hz, 1H), 1.85 (d,  $J = 10.6$  Hz, 1H), 1.30 (t,  $J = 7.2$  Hz, 3H), 0.83 (s, 9H), -0.07

(s, 3H), -0.43 (s, 3H).  $^{13}\text{C}$  NMR (151 MHz,  $\text{CDCl}_3$ ): (major)  $\delta$  171.9, 163.0 (d,  $J = 246.1$  Hz), 139.2, 137.5 (d,  $J = 3.0$  Hz), 129.6, 127.9 (d,  $J = 19.63$  Hz), 126.6, 114.4 (d,  $J = 21.1$  Hz), 64.4, 60.4, 59.4, 59.1, 58.1, 35.3, 33.6, 29.7, 25.6, 17.9, 14.3, -3.1, -3.4.  $^{19}\text{F}$  NMR (565 MHz,  $\text{CDCl}_3$ ): (major)  $\delta$  -115.6.  $^1\text{H}$  NMR (600 MHz,  $\text{CDCl}_3$ ): (minor)  $\delta$  7.41 – 7.37 (m, 2H), 7.34 – 7.32 (m, 2H), 7.29 – 7.26 (m, 2H), 7.23 – 7.19 (m, 1H), 6.94 – 6.91 (m, 2H), 3.81 – 3.71 (m, 2H), 3.57 (dd,  $J = 10.8, 7.1$  Hz, 1H), 3.53 – 3.46 (m, 2H), 2.86 – 2.79 (m, 1H), 2.74 (d,  $J = 9.1$  Hz, 1H), 2.68 (dd,  $J = 12.3, 8.4$  Hz, 1H), 2.50 (dd,  $J = 12.4, 7.5$  Hz, 1H), 2.23 (d,  $J = 10.3$  Hz, 1H), 2.10 (dd,  $J = 9.2, 4.5$  Hz, 1H), 0.90 (s, 9H), 0.86 (t,  $J = 7.1$  Hz, 3H), 0.00 (s, 3H), -0.27 (s, 3H).  $^{13}\text{C}$  NMR (151 MHz,  $\text{CDCl}_3$ ): (minor)  $\delta$  172.6, 162.8 (d,  $J = 246.1$  Hz), 140.1 (d,  $J = 3.0$  Hz), 139.2, 129.1, 128.2, 128.1, 126.9, 114.2 (d,  $J = 21.1$  Hz), 65.5, 60.1, 59.9, 58.2, 56.7, 36.8, 33.2, 26.1, 18.5, 13.8, -2.6, -2.8.  $^{19}\text{F}$  NMR (565 MHz,  $\text{CDCl}_3$ ): (minor)  $\delta$  -116.1. IR (KBr):  $\nu$  2943, 1732, 1620, 1508, 1454, 1263, 1097, 835, 582  $\text{cm}^{-1}$ . HRMS(ESI) ( $m/z$ ):  $[\text{M}+\text{Na}]^+$  Calcd for  $\text{C}_{28}\text{H}_{38}\text{FNNaO}_3\text{Si}$  506.2497; found: 506.2496.

**Ethyl-3-benzyl-7-((tert-butyldimethylsilyl)oxy)-7-(3-chlorophenyl)-3-azabicyclo[3.2.0]heptane-1-carboxylate (7d)**

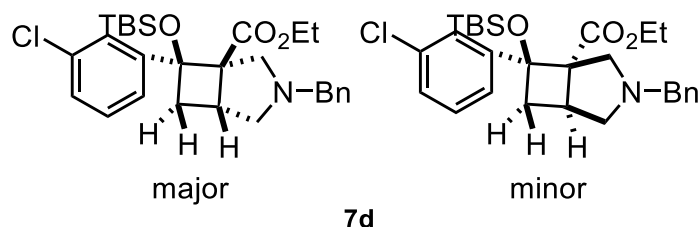

According to the general procedure, the 3-azabicyclo[3.2.0]heptane **7d** was isolated (petroleum ether/EtOAc = 60:1 v/v as the eluent solvent) as a colorless oil (97.6 mg, 1.2:1 *dr*, 78% yield).  $^1\text{H}$  NMR (600 MHz,  $\text{CDCl}_3$ ): (major)  $\delta$  7.66 (d,  $J = 2.2$  Hz, 1H), 7.53 (d,  $J = 6.8$  Hz, 1H), 7.35 – 7.30 (m, 2H), 7.26 – 7.19 (m, 3H), 7.06 (d,  $J = 6.3$  Hz, 2H), 4.32 – 4.25 (m, 1H), 4.25 – 4.18 (m, 1H), 3.70 (d,  $J = 13.4$  Hz, 1H), 3.42 – 3.36 (m, 1H), 3.30 (d,  $J = 13.4$  Hz, 1H), 2.93 – 2.81 (m, 2H), 2.61 (d,  $J = 10.7$  Hz, 1H), 2.39 (dd,  $J = 12.8, 9.4$  Hz, 1H), 2.29 (dd,  $J = 9.2, 5.1$  Hz, 1H), 1.93 (d,  $J = 10.7$  Hz, 1H), 1.38 (t,  $J = 7.2$  Hz, 3H), 0.90 (s, 9H), 0.00 (s, 3H), -0.32 (s, 3H).  $^{13}\text{C}$  NMR (151 MHz,  $\text{CDCl}_3$ ): (major)  $\delta$  171.7, 143.7, 139.1, 133.6, 128.9, 128.4, 128.1, 127.9, 127.4, 126.6, 126.1, 80.0, 64.4, 60.4, 59.3, 59.2, 58.0, 34.9, 33.7, 25.6, 18.0, 14.3, -3.0, -3.3.  $^1\text{H}$  NMR

(400 MHz, CDCl<sub>3</sub>): (minor)  $\delta$  7.50 (t,  $J = 1.9$  Hz, 1H), 7.41 – 7.30 (m, 5H), 7.29 – 7.17 (m, 3H), 3.84 (s, 1H), 3.81 (d,  $J = 3.2$  Hz, 1H), 3.69 – 3.49 (m, 3H), 2.93 – 2.84 (m, 1H), 2.80 (d,  $J = 9.2$  Hz, 1H), 2.71 (dd,  $J = 12.4, 8.4$  Hz, 1H), 2.56 (dd,  $J = 12.4, 7.5$  Hz, 1H), 2.28 (d,  $J = 10.4$  Hz, 1H), 2.16 (dd,  $J = 9.2, 4.5$  Hz, 1H), 0.96 (s, 9H), 0.93 (t,  $J = 7.1$  Hz, 3H), 0.07 (s, 3H), -0.19 (s, 3H). **<sup>13</sup>C NMR** (151 MHz, CDCl<sub>3</sub>): (minor)  $\delta$  172.4, 146.6, 139.1, 133.6, 129.1, 128.8, 128.2, 127.2, 127.1, 126.9, 124.2, 65.4, 60.2, 59.9, 58.2, 56.73, 36.7, 33.30, 26.1, 18.5, 13.73, -2.55, -2.8. **IR** (KBr):  $\nu$  2947, 1733, 1631, 1465, 1413, 1261, 1103, 833, 466 cm<sup>-1</sup>. **HRMS(ESI)** ( $m/z$ ): [M+H]<sup>+</sup> Calcd for C<sub>28</sub>H<sub>39</sub>ClNO<sub>3</sub>Si 500.2382; found: 500.2384.

**Ethyl-3-benzyl-7-((tert-butyldimethylsilyloxy)-7-(4-chlorophenyl)-3-azabicyclo[3.2.0]heptane-1-carboxylate (7e)**

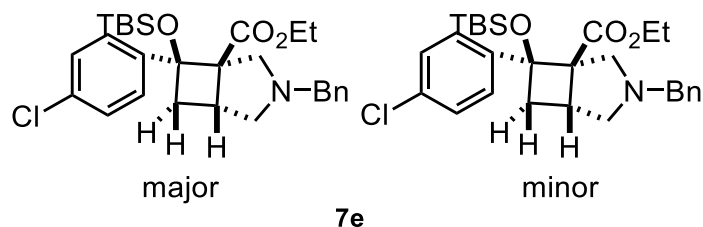

According to the general procedure, the 3-azabicyclo[3.2.0]heptane **7e** was isolated (petroleum ether/EtOAc = 60:1 v/v as the eluent solvent) as a colorless oil (32.5 mg, 1:1 *dr*, 26% yield). **<sup>1</sup>H NMR** (400 MHz, CDCl<sub>3</sub>): (major)  $\delta$  7.51 (d,  $J = 8.1$  Hz, 2H), 7.32 (d,  $J = 8.2$  Hz, 2H), 7.16 (d,  $J = 3.8$  Hz, 3H), 6.90 (s, 2H), 4.26 – 4.09 (m, 2H), 3.65 (d,  $J = 13.5$  Hz, 1H), 3.32 (s, 1H), 3.21 (d,  $J = 13.5$  Hz, 1H), 2.86 – 2.67 (m, 2H), 2.58 (d,  $J = 10.6$  Hz, 1H), 2.35 (dd,  $J = 12.8, 9.6$  Hz, 1H), 2.26 – 2.15 (m, 1H), 1.83 (d,  $J = 10.7$  Hz, 1H), 1.29 (t,  $J = 7.2$  Hz, 3H), 0.82 (s, 9H), -0.07 (s, 3H), -0.42 (s, 3H). **<sup>13</sup>C NMR** (151 MHz, CDCl<sub>3</sub>): (major)  $\delta$  171.8, 140.1, 139.1, 133.2, 129.4, 128.0, 127.8, 127.8, 126.6, 64.4, 60.4, 59.4, 59.1, 58.5, 58.0, 53.5, 35.1, 33.5, 29.7, 25.6, 18.5, 17.9, 14.3, -3.0, -3.3. **<sup>1</sup>H NMR** (400 MHz, CDCl<sub>3</sub>): (minor)  $\delta$  7.44 – 7.36 (m, 4H), 7.35 – 7.31 (m, 2H), 7.28 – 7.25 (m, 3H), 3.85 (s, 1H), 3.82 (d,  $J = 3.1$  Hz, 1H), 3.66 – 3.61 (m, 1H), 3.60 – 3.51 (m, 2H), 2.91 – 2.85 (m, 1H), 2.80 (d,  $J = 9.2$  Hz, 1H), 2.72 (dd,  $J = 12.3, 8.4$  Hz, 1H), 2.56 (dd,  $J = 12.3, 7.5$  Hz, 1H), 2.28 (d,  $J = 10.4$  Hz, 1H), 2.16 (dd,  $J = 9.2, 4.5$  Hz, 1H), 0.96 (s, 9H), 0.92 (t,  $J = 7.2$  Hz, 3H), 0.07 (s, 3H), -0.20 (s, 3H). **<sup>13</sup>C NMR** (151 MHz, CDCl<sub>3</sub>): (minor)  $\delta$  129.1, 128.2, 127.9, 127.6, 126.9, 65.4, 60.1,

59.9, 58.5, 58.2, 56.7, 53.5, 36.7, 33.3, 29.7, 26.1, 18.5, 13.78, -2.6, -2.7. **IR** (KBr):  $\nu$  2935, 1732, 1629, 1467, 1263, 1095, 833, 576  $\text{cm}^{-1}$ . **HRMS(ESI)** ( $m/z$ ):  $[\text{M}+\text{H}]^+$  Calcd for  $\text{C}_{28}\text{H}_{39}\text{ClNO}_3\text{Si}$  500.2382; found: 500.2384.

**Ethyl-3-benzyl-7-(2-bromophenyl)-7-((tert-butyldimethylsilyl)oxy)-3-azabicyclo[3.2.0]heptane-1-carboxylate (7f)**

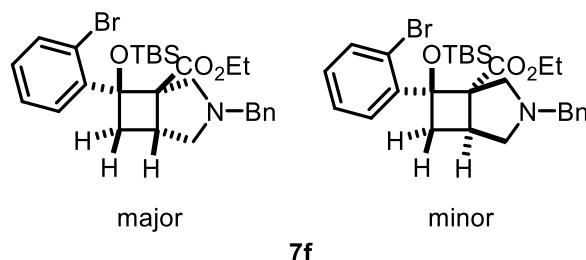

According to the general procedure, the 3-azabicyclo[3.2.0]heptane **7f** was isolated (petroleum ether/EtOAc = 60:1 v/v as the eluent solvent) as a colorless oil (56.5 mg, 3:1 *dr*, 42% yield). **<sup>1</sup>H NMR** (600 MHz,  $\text{CDCl}_3$ ):  $\delta$  8.04\* (d,  $J = 7.9$  Hz, 1H), 7.53\* (d,  $J = 8.0$  Hz, 1H), 7.25 – 7.18\* (m, 2H), 7.06\* (d,  $J = 3.4$  Hz, 3H), 6.96 – 6.94\* (m, 2H), 4.16 (q,  $J = 7.2$  Hz, 2H), 3.59\* (d,  $J = 13.8$  Hz, 1H), 3.37 – 3.31\* (m, 2H), 3.31 – 3.26\* (m, 1H), 2.85\* (d,  $J = 10.7$  Hz, 1H), 2.68\* (d,  $J = 9.1$  Hz, 1H), 2.48\* (dd,  $J = 12.7, 8.6$  Hz, 1H), 2.28\* (dd,  $J = 9.2, 5.0$  Hz, 1H), 2.09\* (d,  $J = 10.8$  Hz, 1H), 1.27\* (t,  $J = 7.2$  Hz, 3H), 0.75\* (s, 9H), 0.00\* (s, 3H), -0.53\* (s, 3H). **<sup>13</sup>C NMR** (151 MHz,  $\text{CDCl}_3$ ):  $\delta$  172.4, 172.0, 140.1, 139.3, 135.0, 134.5, 133.3, 130.0, 129.0, 128.8, 128.0, 127.9, 127.8, 127.7, 127.1, 126.4, 121.6, 83.5, 65.8, 64.3, 60.7, 60.4, 59.5, 59.2, 59.1, 58.5, 58.4, 39.1, 38.2, 35.1, 34.2, 31.5, 30.2, 29.7, 25.6, 25.5, 18.1, 18.0, 14.3, 14.1, -3.0, -4.0. **IR** (KBr):  $\nu$  2937, 1728, 1463, 1375, 1261, 1101, 833, 468  $\text{cm}^{-1}$ . **HRMS(APCI)** ( $m/z$ ):  $[\text{M}+\text{H}]^+$  Calcd for  $\text{C}_{28}\text{H}_{39}\text{BrNO}_3\text{Si}$  544.1877; found: 544.1872.

**Ethyl-3-benzyl-7-(3-bromophenyl)-7-((tert-butyldimethylsilyl)oxy)-3-azabicyclo[3.2.0]heptane-1-carboxylate (7g)**

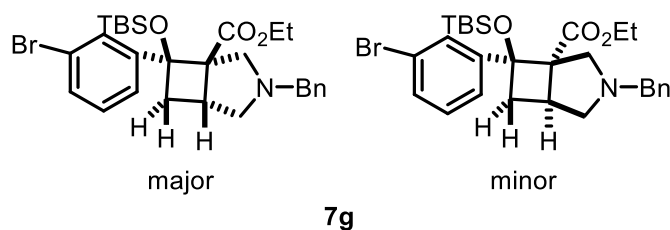

According to the general procedure, the 3-azabicyclo[3.2.0]heptane **7g** was isolated (petroleum ether/EtOAc = 60:1 v/v as the eluent solvent) as a colorless oil (72.0 mg, 1:1 *dr*, 53% yield). <sup>1</sup>H NMR (600 MHz, CDCl<sub>3</sub>): (major) δ 7.76 (s, 1H), 7.52 (d, *J* = 7.9 Hz, 1H), 7.45 – 7.37 (m, 1H), 7.30 – 7.11 (m, 4H), 7.01 (d, *J* = 7.0 Hz, 2H), 4.28 – 4.11 (m, 2H), 3.63 (d, *J* = 13.5 Hz, 1H), 3.37 – 3.15 (m, 2H), 2.82 (t, *J* = 12.4 Hz, 2H), 2.55 (d, *J* = 10.8 Hz, 1H), 2.45 – 2.29 (m, 1H), 2.22 (s, 1H), 1.87 (d, *J* = 10.8 Hz, 1H), 1.32 (td, *J* = 6.9, 2.7 Hz, 3H), 0.84 (s, 9H), -0.06 (s, 3H), -0.38 (s, 3H). <sup>13</sup>C NMR (151 MHz, CDCl<sub>3</sub>): (major) δ 171.6, 143.9, 139.09, 130.1, 130.3, 129.2, 128.0, 127.9, 126.6, 126.5, 121.8, 79.9, 64.4, 60.4, 59.2, 59.1, 58.0, 34.9, 33.7, 29.7, 25.6, 17.9, 14.2, -3.1, -3.3. <sup>1</sup>H NMR (600 MHz, CDCl<sub>3</sub>): (minor) δ 7.60 – 7.59 (m, 1H), 7.33 – 7.25 (m, 6H), 7.22 – 7.17 (m, 1H), 7.12 – 7.10 (m, 1H), 3.77 (s, 1H), 3.75 (d, *J* = 2.4 Hz, 1H), 3.61 – 3.49 (m, 2H), 3.48 (d, *J* = 12.7 Hz, 1H), 2.84 – 2.81 (m, 1H), 2.74 (d, *J* = 9.2 Hz, 1H), 2.64 (dd, *J* = 12.4, 8.4 Hz, 1H), 2.49 (dd, *J* = 12.4, 7.5 Hz, 1H), 2.21 (d, *J* = 10.4 Hz, 1H), 2.10 (dd, *J* = 9.2, 4.5 Hz, 1H), 0.90 (s, 9H), 0.87 (t, *J* = 7.1 Hz, 3H), 0.00 (s, 3H), -0.25 (s, 3H). <sup>13</sup>C NMR (151 MHz, CDCl<sub>3</sub>): (minor) δ 172.4, 146.8, 139.1, 130.1, 130.0, 129.1, 129.1, 128.2, 126.9, 124.6, 121.9, 75.9, 65.4, 60.2, 59.9, 58.2, 56.7, 36.7, 33.3, 26.1, 18.5, 13.8, -2.6, -2.8. IR (KBr): ν 2941, 1732, 1463, 1363, 1265, 1103, 829, 468 cm<sup>-1</sup>. HRMS(APCI) (*m/z*): [M+H]<sup>+</sup> Calcd for C<sub>28</sub>H<sub>39</sub>BrNO<sub>3</sub>Si 544.1877; found: 544.1872.

**Ethyl-3-benzyl-7-(4-bromophenyl)-7-((tert-butyldimethylsilyl)oxy)-3-azabicyclo[3.2.0]heptane-1-carboxylate (7h)**

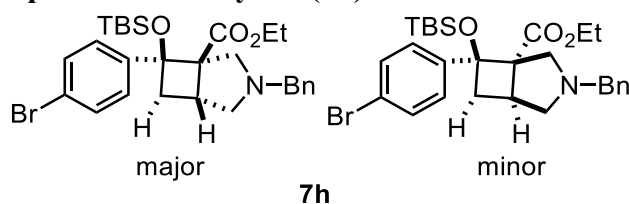

According to the general procedure, the 3-azabicyclo[3.2.0]heptane **7h** was isolated (petroleum ether/EtOAc = 60:1 v/v as the eluent solvent) as a colorless oil (42.1 mg, 1:1 *dr*, 31% yield). <sup>1</sup>H NMR (400 MHz, CDCl<sub>3</sub>): (major) δ 7.49 – 7.44 (m, 4H), 7.17 (d, *J* = 4.9 Hz, 3H), 6.91 – 6.90 (m, 2H), 4.30 – 4.09 (m, 2H), 3.65 (d, *J* = 13.4 Hz, 1H), 3.32 (s, 1H), 3.21 (d, *J* = 13.4 Hz, 1H), 2.86 – 2.76 (m, 2H), 2.57 (d, *J* = 10.4 Hz, 1H), 2.35 (dd, *J* = 12.8, 9.5 Hz, 1H), 2.29 – 2.18 (m, 1H), 1.83 (d, *J* = 10.6 Hz, 1H), 1.28 (d,

$J = 7.4$  Hz, 3H), 0.82 (s, 9H), -0.07 (s, 3H), -0.42 (s, 3H).  $^{13}\text{C NMR}$  (151 MHz,  $\text{CDCl}_3$ ): (major)  $\delta$  171.8, 140.6, 139.1, 130.8, 129.7, 128.0, 127.8, 126.6, 121.5, 64.3, 60.4, 59.4, 59.1, 58.0, 35.1, 33.5, 29.7, 25.6, 17.9, 14.3, -3.1, -3.3.  $^1\text{H NMR}$  (600 MHz,  $\text{CDCl}_3$ ): (minor)  $\delta$  7.38 – 7.34 (m, 2H), 7.33 – 7.24 (m, 6H), 7.23 – 7.17 (m, 1H), 3.76 (d,  $J = 10.8$  Hz, 2H), 3.60 – 3.54 (m, 1H), 3.53 – 3.45 (m, 2H), 2.83 – 2.79 (m, 1H), 2.73 (d,  $J = 9.2$  Hz, 1H), 2.64 (dd,  $J = 12.4, 8.4$  Hz, 1H), 2.49 (dd,  $J = 12.4, 7.5$  Hz, 1H), 2.21 (d,  $J = 10.4$  Hz, 1H), 2.09 (dd,  $J = 9.2, 4.5$  Hz, 1H), 0.89 (s, 9H), 0.85 (t,  $J = 7.1$  Hz, 3H), 0.00 (s, 3H), -0.27 (s, 3H).  $^{13}\text{C NMR}$  (151 MHz,  $\text{CDCl}_3$ ): (minor)  $\delta$  172.4, 143.5, 139.1, 130.5, 129.1, 128.2, 128.2, 126.9, 121.1, 76.0, 65.4, 60.1, 59.9, 58.2, 56.7, 36.6, 33.3, 26.1, 18.5, 13.8, -2.5, -2.7. **IR** (KBr):  $\nu$  2927, 1733, 1631, 1463, 1269, 1049, 831, 590  $\text{cm}^{-1}$ . **HRMS(ESI)** ( $m/z$ ):  $[\text{M}+\text{H}]^+$  Calcd for  $\text{C}_{28}\text{H}_{39}\text{BrNO}_3\text{Si}$  544.1877; found: 544.1872.

**Ethyl-3-benzyl-7-((tert-butyldimethylsilyl)oxy)-7-(3-nitrophenyl)-3-azabicyclo[3.2.0]heptane-1-carboxylate (7i)**

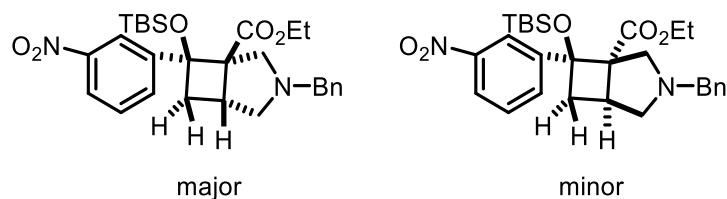

**7i**

According to the general procedure, the 3-azabicyclo[3.2.0]heptane **7i** was isolated (petroleum ether/EtOAc = 60:1 v/v as the eluent solvent) as a colorless oil (17.5 mg, 1:1 *dr*, 14% yield).  $^1\text{H NMR}$  (600 MHz,  $\text{CDCl}_3$ ): (major)  $\delta$  8.48 – 8.45(m, 1H), 8.13 (d,  $J = 8.8$  Hz, 1H), 7.93 – 7.89 (m, 1H), 7.49 – 7.42 (m, 1H), 7.13 – 7.09 (m, 3H), 6.98 (d,  $J = 4.2$  Hz, 2H), 4.27 – 4.22 (m, 1H), 4.17 – 4.13 (m, 1H), 3.60 (dd,  $J = 13.3, 4.5$  Hz, 1H), 3.37 – 3.33 (m, 1H), 3.19 (dd,  $J = 13.3, 4.6$  Hz, 1H), 2.87 (dd,  $J = 9.8, 4.3$  Hz, 2H), 2.43 – 2.37 (m, 1H), 2.34 (dd,  $J = 11.1, 4.4$  Hz, 1H), 2.25 – 2.20 (m, 1H), 1.89 – 1.82 (m, 1H), 1.25 (d,  $J = 4.5$  Hz, 3H), 0.84 (s, 9H), -0.04 (s, 3H), -0.39 (s, 3H).  $^{13}\text{C NMR}$  (151 MHz,  $\text{CDCl}_3$ ): (major)  $\delta$  171.3, 147.8, 143.8, 138.8, 133.9, 128.5, 128.1, 128.1, 128.1, 126.8, 122.4, 64.3, 60.6, 59.2, 59.2, 57.9, 34.8, 33.7, 29.7, 25.6, 25.6, 18.0, 14.2, -2.9, -3.2.  $^1\text{H NMR}$  (600 MHz,  $\text{CDCl}_3$ ): (minor)  $\delta$  8.30 – 8.29 (m,  $J = 2.1$  Hz, 1H), 8.00 – 7.99 (m, 1H), 7.69 (d,  $J = 7.9$  Hz, 1H), 7.39 – 7.36 (m, 1H), 7.27 (d,  $J = 6.6$

Hz, 2H), 7.24 – 7.22 (m, 2H), 7.18 – 7.15 (m, 1H), 3.72 (dd,  $J = 11.5, 4.4$  Hz, 2H), 3.52 – 3.37 (m, 3H), 2.86 – 2.83 (m, 1H), 2.73 (d,  $J = 9.2$  Hz, 1H), 2.64 (dd,  $J = 12.6, 8.4$  Hz, 1H), 2.55 (dd,  $J = 12.6, 7.5$  Hz, 1H), 2.18 (d,  $J = 10.5$  Hz, 1H), 2.08 (dd,  $J = 9.2, 4.5$  Hz, 1H), 0.86 (s, 9H), 0.75 (t,  $J = 7.1$  Hz, 3H), 0.00 (s, 3H), -0.32 (s, 3H).  $^{13}\text{C NMR}$  (151 MHz,  $\text{CDCl}_3$ ): (minor)  $\delta$  174.5, 150.2, 149.5, 141.3, 134.7, 131.6, 131.0, 130.7, 129.4, 124.5, 124.1, 67.7, 62.7, 62.3, 60.6, 59.1, 39.2, 35.7, 32.1, 28.5, 20.9, 16.2. **IR** (KBr):  $\nu$  2931, 1726, 1531, 1461, 1348, 1251, 1087, 837, 684  $\text{cm}^{-1}$ . **HRMS(ESI)** ( $m/z$ ):  $[\text{M}+\text{Na}]^+$  Calcd for  $\text{C}_{28}\text{H}_{38}\text{N}_2\text{NaO}_5\text{Si}$  533.2442; found: 533.2438.

**Ethyl-3-benzyl-7-((tert-butyldimethylsilyl)oxy)-7-(4-cyanophenyl)-3-azabicyclo[3.2.0]heptane-1-carboxylate (7j)**

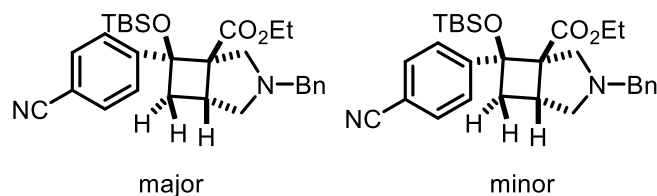

**7j**

According to the general procedure, the 3-azabicyclo[3.2.0]heptane **7j** was isolated (petroleum ether/EtOAc = 60:1 v/v as the eluent solvent) as a colorless oil (53.0 mg, 6:1 *dr*, 43% yield).  $^1\text{H NMR}$  (600 MHz,  $\text{CDCl}_3$ ): (major)  $\delta$  7.69 (d,  $J = 8.4$  Hz, 2H), 7.62 (d,  $J = 8.5$  Hz, 2H), 7.20 – 7.13 (m, 3H), 6.91 (d,  $J = 7.5$  Hz, 2H), 4.26 – 4.13 (m, 2H), 3.63 (d,  $J = 13.3$  Hz, 1H), 3.35 – 3.32 (m, 1H), 3.18 (d,  $J = 13.3$  Hz, 1H), 2.87 – 2.79 (m, 2H), 2.45 – 2.35 (m, 2H), 2.24 (dd,  $J = 9.3, 5.1$  Hz, 1H), 1.85 (d,  $J = 10.8$  Hz, 1H), 1.30 (t,  $J = 7.1$  Hz, 3H), 0.82 (s, 9H), -0.05 (s, 3H), -0.42 (s, 3H).  $^{13}\text{C NMR}$  (151 MHz,  $\text{CDCl}_3$ ): (major)  $\delta$  171.4, 146.9, 138.8, 131.4, 128.5, 128.0, 127.9, 126.8, 119.0, 111.0, 79.8, 64.35, 60.5, 59.3, 59.1, 57.8, 34.7, 33.5, 25.5, 18.0, 14.2, -2.9, -3.2.  $^1\text{H NMR}$  (600 MHz,  $\text{CDCl}_3$ ): (minor)  $\delta$  7.51 (s, 4H), 7.30 – 7.26 (m, 2H), 7.25 – 7.23 (m, 2H), 7.19 – 7.17 (m, 1H), 3.73 (dd,  $J = 11.5, 3.8$  Hz, 2H), 3.54 – 3.48 (m, 1H), 3.48 – 3.39 (m, 2H), 2.83 – 2.80 (m, 1H), 2.73 (d,  $J = 9.2$  Hz, 1H), 2.62 (dd,  $J = 12.5, 8.4$  Hz, 1H), 2.52 (dd,  $J = 12.6, 7.5$  Hz, 1H), 2.19 (d,  $J = 10.5$  Hz, 1H), 2.08 (dd,  $J = 9.2, 4.5$  Hz, 1H), 0.86 (s, 9H), 0.79 (t,  $J = 7.1$  Hz, 3H), 0.01 (s, 3H), -0.31 (s, 3H).  $^{13}\text{C NMR}$  (151 MHz,  $\text{CDCl}_3$ ): (minor)  $\delta$  174.5, 152.5, 141.3, 133.8, 131.6, 130.6, 129.5, 129.4, 121.3, 113.3, 78.6, 67.8, 62.7, 62.3, 60.6, 59.2, 39.0, 35.8, 28.5, 20.9, 16.2. **IR** (KBr):  $\nu$  2941, 2227, 1722,

1633, 1460, 1361, 1253, 1097, 835, 582  $\text{cm}^{-1}$ . **HRMS(APCI)** ( $m/z$ ):  $[\text{M}+\text{H}]^+$  Calcd for  $\text{C}_{29}\text{H}_{39}\text{N}_2\text{O}_3\text{Si}$  491.2724; found: 491.2706.

**Ethyl-3-benzyl-7-((tert-butyldimethylsilyl)oxy)-7-(o-tolyl)-3-azabicyclo[3.2.0]heptane-1-carboxylate (7k)**

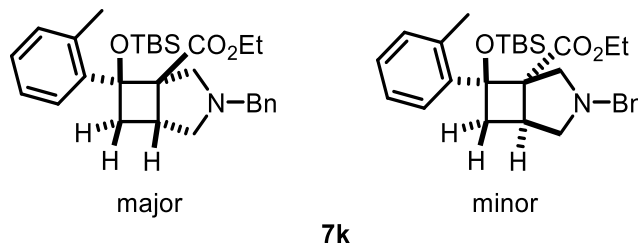

According to the general procedure, the 3-azabicyclo[3.2.0]heptane **7k** was isolated (petroleum ether/EtOAc = 60:1 v/v as the eluent solvent) as a colorless oil (29.0 mg, 3.8:1 *dr*, 24% yield).  **$^1\text{H}$  NMR** (400 MHz,  $\text{CDCl}_3$ ):  $\delta$  7.60 – 7.51\* (m, 1H), 7.31 – 7.24\* (m, 2H), 7.13 – 7.04\* (m, 4H), 6.67\* (d,  $J = 7.0$  Hz, 2H), 4.31 – 4.08\* (m, 2H), 3.57\* (d,  $J = 13.5$  Hz, 1H), 3.31 – 3.19\* (m, 1H), 3.19 – 3.04\* (m, 2H), 2.73\* (dd,  $J = 23.8, 9.8$  Hz, 2H), 2.64 – 2.52\* (m, 1H), 2.38\* (d,  $J = 2.5$  Hz, 3H), 2.30 – 2.20\* (m, 1H), 2.06\* (d,  $J = 9.7$  Hz, 1H), 1.33 – 1.29 (m, 3H), 0.84 (d,  $J = 2.5$  Hz, 9H), -0.06 (s, 3H), -0.58 (s, 3H).  **$^{13}\text{C}$  NMR** (151 MHz,  $\text{CDCl}_3$ ):  $\delta$  172.6, 172.3, 139.3, 138.8, 131.9, 128.3, 127.9, 127.7, 127.6, 127.6, 126.2, 124.8, 83.0, 82.0, 64.9, 60.6, 59.7, 59.4, 58.0, 39.9, 37.9, 35.3, 33.5, 29.7, 25.6, 22.5, 21.5, 18.0, 14.1, -2.9, -3.4, -3.8, -4.3. **IR** (KBr):  $\nu$  2941, 1724, 1631, 1460, 1377, 1261, 1099, 831, 460  $\text{cm}^{-1}$ . **HRMS(APCI)** ( $m/z$ ):  $[\text{M}+\text{H}]^+$  Calcd for  $\text{C}_{29}\text{H}_{42}\text{NO}_3\text{Si}$  480.2928; found: 480.2927.

**Ethyl-3-benzyl-7-((tert-butyldimethylsilyl)oxy)-6-ethyl-7-phenyl-3-azabicyclo[3.2.0]heptane-1-carboxylate (7l)**

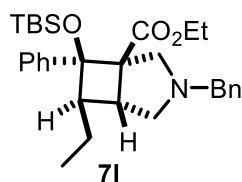

According to the general procedure, the 3-azabicyclo[3.2.0]heptane **7l** was isolated (petroleum ether/EtOAc = 60:1 v/v as the eluent solvent) as a colorless oil (43.3



mg, >20:1 *dr*, 35% yield). **<sup>1</sup>H NMR** (600 MHz, CDCl<sub>3</sub>): δ 7.58 (s, 2H), 7.41 – 7.31 (m, 3H), 7.13 – 7.00 (m, 3H), 6.78 (d, *J* = 7.0 Hz, 2H), 4.29 – 4.24 (m, 1H), 4.17 – 4.15 (m, 1H), 3.71 (d, *J* = 14.2 Hz, 1H), 3.25 (d, *J* = 14.2 Hz, 1H), 3.01 (d, *J* = 10.7 Hz, 1H), 2.99 – 2.91 (m, 1H), 2.84 – 2.80 (m, 1H), 2.37 (dd, *J* = 9.0, 5.0 Hz, 1H), 2.00 (d, *J* = 10.7 Hz, 1H), 1.86 – 1.77 (m, 1H), 1.77 – 1.70 (m, 1H), 1.66 (d, *J* = 4.7 Hz, 1H), 1.32 (t, *J* = 7.1 Hz, 3H), 0.99 (t, *J* = 7.4 Hz, 3H), 0.83 (s, 9H), -0.39 (s, 3H), -0.42 (s, 3H). **<sup>13</sup>C NMR** (151 MHz, CDCl<sub>3</sub>): δ 172.5, 141.4, 139.3, 127.9, 127.8, 127.7, 127.3, 126.2, 82.5, 62.2, 60.4, 59.6, 58.6, 58.4, 47.6, 41.4, 26.2, 22.9, 18.8, 14.1, 11.2, -2.4, -2.9. **IR** (KBr): ν 2956, 1730, 1458, 1373, 1257, 1118, 837, 700 cm<sup>-1</sup>. **HRMS(ESI)** (*m/z*): [M+Na]<sup>+</sup> Calcd for C<sub>30</sub>H<sub>43</sub>NNaO<sub>3</sub>Si 516.2904; found: 516.2909.

**Ethyl-3-benzyl-7-((tert-butyldimethylsilyl)oxy)-7-(3-chlorophenyl)-6-methyl-3-azabicyclo[3.2.0]heptane-1-carboxylate (7m)**

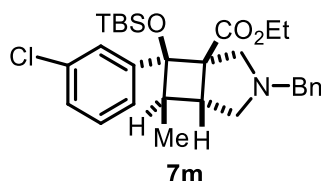

According to the general procedure, the 3-azabicyclo[3.2.0]heptane **7m** was isolated (petroleum ether/EtOAc = 60:1 v/v as the eluent solvent) as a colorless oil (64.3 mg, >20:1 *dr*, 50% yield). **<sup>1</sup>H NMR** (600 MHz, CDCl<sub>3</sub>): δ 7.50 (s, 2H), 7.33 (d, *J* = 8.3 Hz, 2H), 7.16 – 7.07 (m, 3H), 6.78 (d, *J* = 7.1 Hz, 2H), 4.30 – 4.20 (m, 1H), 4.19 – 4.10 (m, 1H), 3.68 (d, *J* = 13.9 Hz, 1H), 3.24 (d, *J* = 13.9 Hz, 1H), 3.00 – 2.94 (m, 1H), 2.91 (d, *J* = 10.7 Hz, 1H), 2.83 (dd, *J* = 7.0, 4.7 Hz, 1H), 2.75 (d, *J* = 9.2 Hz, 1H), 2.26 (dd, *J* = 9.2, 4.9 Hz, 1H), 1.94 (d, *J* = 10.8 Hz, 1H), 1.30 (t, *J* = 7.2 Hz, 3H), 1.25 (d, *J* = 7.2 Hz, 3H), 0.83 (s, 9H), -0.31 (s, 3H), -0.43 (s, 3H). **<sup>13</sup>C NMR** (151 MHz, CDCl<sub>3</sub>): δ 172.2, 140.1, 139.2, 133.6, 127.9, 127.4, 126.5, 81.9, 62.4, 60.5, 58.5, 58.4, 58.4, 42.8, 40.2, 26.2, 18.9, 14.9, 14.1, -2.3, -2.6. **IR** (KBr): ν 2972, 1735, 1456, 1375, 1257, 1041, 867, 690 cm<sup>-1</sup>. **HRMS(ESI)** (*m/z*): [M+Na]<sup>+</sup> Calcd for C<sub>29</sub>H<sub>40</sub>ClNNaO<sub>3</sub>Si 536.2358; found: 536.2830.

**Ethyl-3-benzyl-7-((tert-butyldimethylsilyl)oxy)-7-ethyl-6-methyl-3-azabicyclo[3.2.0]heptane-1-carboxylate (7n)**

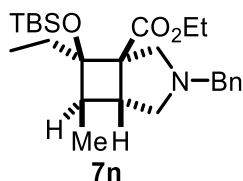

According to the general procedure, the 3-azabicyclo[3.2.0]heptane **7n** was isolated (petroleum ether/EtOAc = 60:1 v/v as the eluent solvent) as a colorless oil (24.6 mg, >20:1 *dr*, 23% yield). <sup>1</sup>H NMR (600 MHz, CDCl<sub>3</sub>): δ 7.24 (d, *J* = 7.6 Hz, 2H), 7.19 (t, *J* = 7.5 Hz, 2H), 7.16 – 7.11 (m, 1H), 4.11 – 3.97 (m, 2H), 3.66 (d, *J* = 12.7 Hz, 1H), 3.35 (d, *J* = 10.2 Hz, 1H), 3.24 (d, *J* = 12.9 Hz, 1H), 2.72 – 2.63 (m, 2H), 2.27 (dd, *J* = 9.7, 7.4 Hz, 1H), 2.17 – 1.97 (m, 2H), 1.55 (dq, *J* = 14.1, 7.0 Hz, 1H), 1.47 (dt, *J* = 14.0, 7.3 Hz, 1H), 1.17 (t, *J* = 7.2 Hz, 3H), 0.93 (d, *J* = 7.5 Hz, 3H), 0.85 (s, 9H), 0.75 (t, *J* = 7.2 Hz, 3H), -0.00 (s, 6H). <sup>13</sup>C NMR (151 MHz, CDCl<sub>3</sub>): δ 174.2, 128.8, 128.1, 126.8, 63.2, 60.3, 58.5, 53.9, 37.5, 36.3, 31.9, 26.1, 19.2, 14.3, 9.7, 7.1, -1.8, -2.4. IR (KBr): ν 2933, 1724, 1458, 1375, 1253, 1182, 1039, 835, 775, 690 cm<sup>-1</sup>. HRMS(APCI) (*m/z*): [M+H]<sup>+</sup> Calcd for C<sub>25</sub>H<sub>42</sub>NO<sub>3</sub>Si 432.2928; found: 432.2932.

### Ethyl-3-benzyl-7-((triisopropylsilyl)methyl)-3-azabicyclo[3.2.0]heptane-1-carboxylate (**7o**)

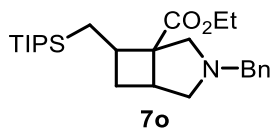

According to the general procedure, the 3-azabicyclo[3.2.0]heptane **7o** was isolated (petroleum ether/EtOAc = 60:1 v/v as the eluent solvent) as a colorless oil (61.0 mg, >20:1 *dr*, 57% yield). <sup>1</sup>H NMR (600 MHz, CDCl<sub>3</sub>): δ 7.38 (d, *J* = 7.2 Hz, 2H), 7.31 (t, *J* = 7.5 Hz, 2H), 7.29 – 7.21 (m, 1H), 4.25 – 4.08 (m, 2H), 3.75 (d, *J* = 13.4 Hz, 1H), 3.58 (d, *J* = 13.4 Hz, 1H), 2.93 (dd, *J* = 9.8, 6.9 Hz, 2H), 2.83 (d, *J* = 9.3 Hz, 1H), 2.78 – 2.70 (m, 1H), 2.26 (dd, *J* = 9.3, 6.3 Hz, 1H), 2.14 (d, *J* = 9.5 Hz, 1H), 2.06 – 1.95 (m, 1H), 1.93 – 1.81 (m, 1H), 1.63 (d, *J* = 5.1 Hz, 1H), 1.26 (t, *J* = 7.1 Hz, 3H), 1.02 (dd, *J* = 5.5, 2.6 Hz, 20H), 0.78 – 0.66 (m, 2H). <sup>13</sup>C NMR (151 MHz, CDCl<sub>3</sub>): δ 173.6, 139.7, 128.4, 128.2, 126.8, 61.1, 60.0, 59.9, 59.3, 58.8, 37.7, 35.4, 32.6, 18.8, 18.8, 14.7, 12.3, 11.2. IR (KBr): ν 2933, 1724, 1460, 1371, 1271, 1201, 740 cm<sup>-1</sup>. HRMS(ESI) (*m/z*): [M+H]<sup>+</sup> Calcd for C<sub>26</sub>H<sub>44</sub>NO<sub>2</sub>Si 430.3136; found: 430.3135.

## V. Determination of the Relative Configuration of **7m** by NMR Spectroscopy

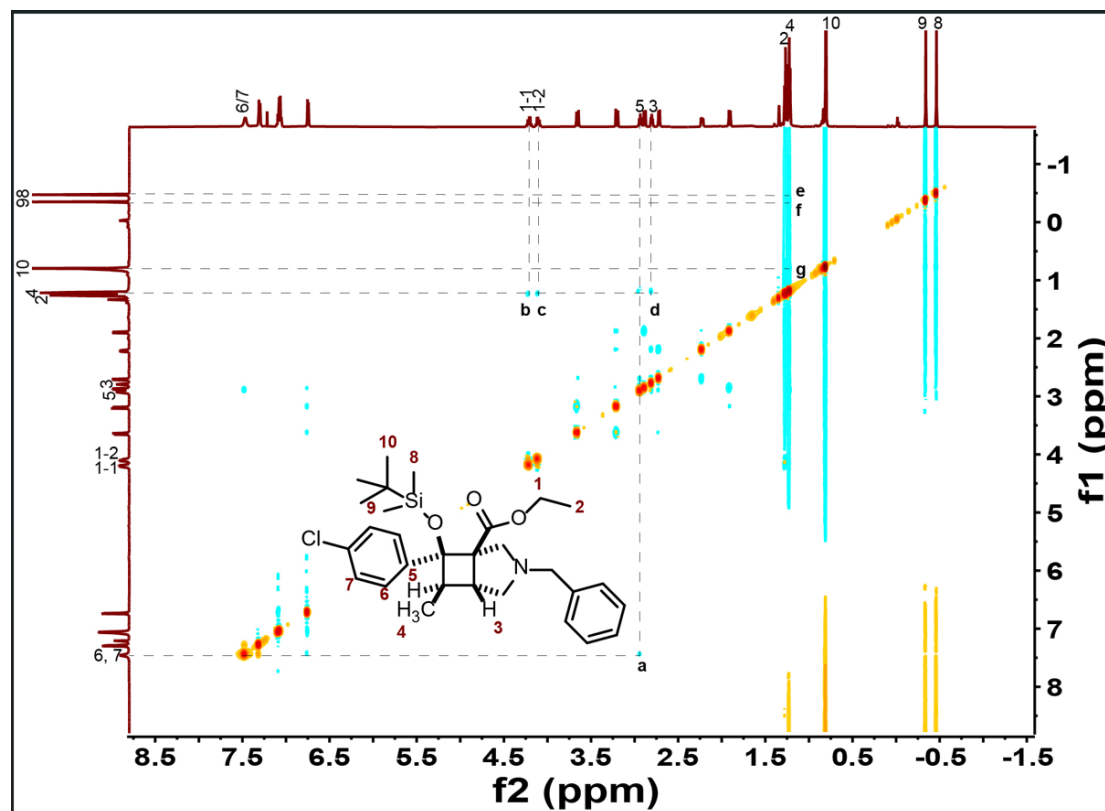

Figure. 2D NOESY spectrum of **7m** at 600 MHz in CDCl<sub>3</sub>.

Proton 5 and proton 6 or 7 have NOE contact (a), proving that 5 and 4-chlorobenzene are on the same side. 4 and 1 have NOE contact (b,c), indicating that -Me and -CO<sub>2</sub>Et are on the same side. 4 and 3 have NOE contact (d), proving that proton 3 and -Me are on the same side. 4 and 8,9,10 both have NOE contact (e,f,g), proving that -Me and -OTBS are on the same side.

## VI. Gram-scale Reaction and Product Transformation

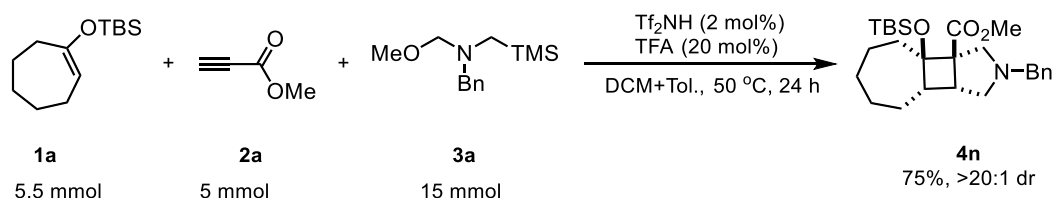

To a stirred mixture of **1a** (1.24g, 5.5 mmol) in DCM (5 mL) was added methyl propiolate **2a** (0.42g, 5 mmol) and 0.08 M Tf<sub>2</sub>NH of toluene solution (1.25 mL), and the mixture gave a light yellow solution. The mixture stirred until the substrate disappeared via TLC detection, then 5 mL toluene, N-benzyl-1-methoxy-N-((trimethylsilyl) methyl) methanamine **3a** (3.55g, 15 mmol) and TFA (0.2 eq. 1.0 mmol)

were added sequentially, and the reaction mixture was stirred at 50 °C for 24 h. The mixture was quenched with saturated NaHCO<sub>3</sub> solution, extracted with DCM. The combined organic layer was dried over Na<sub>2</sub>SO<sub>4</sub> and the solvent was evaporated in vacuo. The crude material was purified by column chromatography (petroleum ether/ethyl acetate = 60:1) on silica gel to provide the desired compound **4n** (1.65g, 75%, >20:1 *dr*) as a colorless oil.

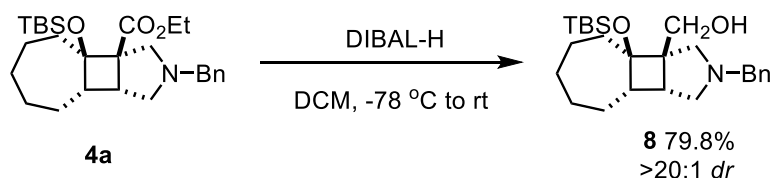

In a schlenk tube **4a** (0.2 mmol, 91.4 mg) was added in anhydrous DCM (2 mL) and then stirred at -78 °C under N<sub>2</sub>. When the reaction temperature was cooled to -78 °C, the Diisobutylaluminium hydride (DIBALH: 0.40 mL, 1.5 M in Hexane, 0.6 mmol, 3.0 equiv) was added by drop. The resulting mixture was stirred at 78 °C for 0.5 h. The reaction mixture was then quenched by MeOH (3 mL) at -78 °C, then was raised to room temperature. And a solution of Na<sub>2</sub>CO<sub>3</sub> (5 mL, 1.0 M) was added and extracted with DCM (10 mL×3). The combined organic layers were washed with brine and dried over with anhydrous Na<sub>2</sub>SO<sub>4</sub>, filtered, and concentrated under reduced pressure. Purification by column chromatography with (petroleum ether/ethyl acetate=1:1) as the eluent to give the colorless oil **8** (67.9mg, 79.8 % >20:1 *dr*). <sup>1</sup>H NMR (400 MHz, CDCl<sub>3</sub>): δ 7.33 – 7.21 (m, 5H), 3.78 – 3.57 (m, 4H), 3.17 – 3.08 (m, 1H), 3.03 (d, *J* = 9.4 Hz, 1H), 2.82 (d, *J* = 9.4 Hz, 1H), 2.14 (dd, *J* = 9.3, 3.5 Hz, 2H), 1.92 (dd, *J* = 13.9, 7.1 Hz, 1H), 1.80 – 1.58 (m, 6H), 1.54 (s, 1H), 1.32 – 1.16 (m, 4H), 0.90 (s, 9H), 0.06 (s, 3H), -0.01 (s, 3H). <sup>13</sup>C NMR (151 MHz, CDCl<sub>3</sub>): δ 140.3, 130.7, 130.4, 129.2, 80.1, 68.1, 62.6, 62.4, 61.4, 57.8, 56.8, 34.0, 28.3, 28.1, 26.4, 20.6. IR (KBr): ν 3450, 2924, 1458, 1375, 1257, 1072, 837 cm<sup>-1</sup>. HRMS(APCI) (*m/z*): [M+H]<sup>+</sup> Calcd for C<sub>25</sub>H<sub>42</sub>NO<sub>2</sub>Si 416.2979; found: 416.2995.

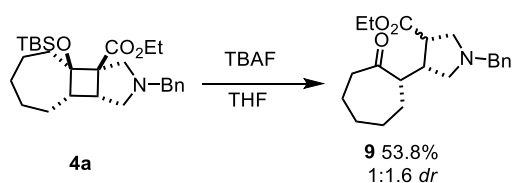

To a solution of **4a** (91.4 mg, 0.2 mmol, 1.0 equiv) in THF at 0 °C was added TBAF

(1.0 M in THF, 3 mL, 1.5 equiv) slowly dropwise. The reaction mixture was then warmed to room temperature and stirred for a further 8 h. Following this, the reaction was quenched by addition of H<sub>2</sub>O (1.5 mL) and the aqueous phase was extracted with EA (3 × 4 mL). The combined organic phases were washed with brine (4 mL), dried over Na<sub>2</sub>SO<sub>4</sub>, filtered and concentrated under reduced pressure. The crude residue obtained was purified by column chromatography (petroleum ether/ethyl acetate = 5:1) on silica gel to provide the title compound as a colorless oil **9**. (68.4 mg, 53.8%, 1:1.6 *dr*) (the diastereoselectivity was determined by <sup>13</sup>C NMR analysis). **<sup>1</sup>H NMR** (400 MHz, CDCl<sub>3</sub>): δ 7.32 – 7.22 (m, 5H), 4.17 – 4.08 (m, 2H), 3.64 – 3.51 (m, 2H), 2.89 – 2.69 (m, 4H), 2.69 – 2.54 (m, 1H), 2.54 – 2.45 (m, 1H), 2.45 – 2.35 (m, 1H), 2.35 – 2.26 (m, 1H), 1.99 – 1.77 (m, 5H), 1.65 – 1.47 (m, 1H), 1.33 – 1.28 (m, 3H), 1.26 – 1.21 (m, 3H). **<sup>13</sup>C NMR** (151 MHz, CDCl<sub>3</sub>): δ 215.6, 215.4, 174.7, 174.4, 138.6, 128.6, 128.6, 128.2, 128.2, 126.9, 60.7, 60.7, 59.8, 59.6, 58.6, 57.8, 57.1, 57.1, 56.8, 56.5, 46.9, 46.8, 43.2, 43.1, 42.4, 29.9, 29.3, 29.2, 29.1, 28.6, 28.0, 25.0, 24.4, 18.4, 14.2. **IR** (KBr): ν 2927, 1730, 1450, 1371, 1170, 1039, 744 cm<sup>-1</sup>. **HRMS(APCI)** (*m/z*): [M+H]<sup>+</sup> Calcd for C<sub>21</sub>H<sub>30</sub>NO<sub>3</sub> 344.2220; found: 344.2223.

## VII. Proposed reaction mechanism

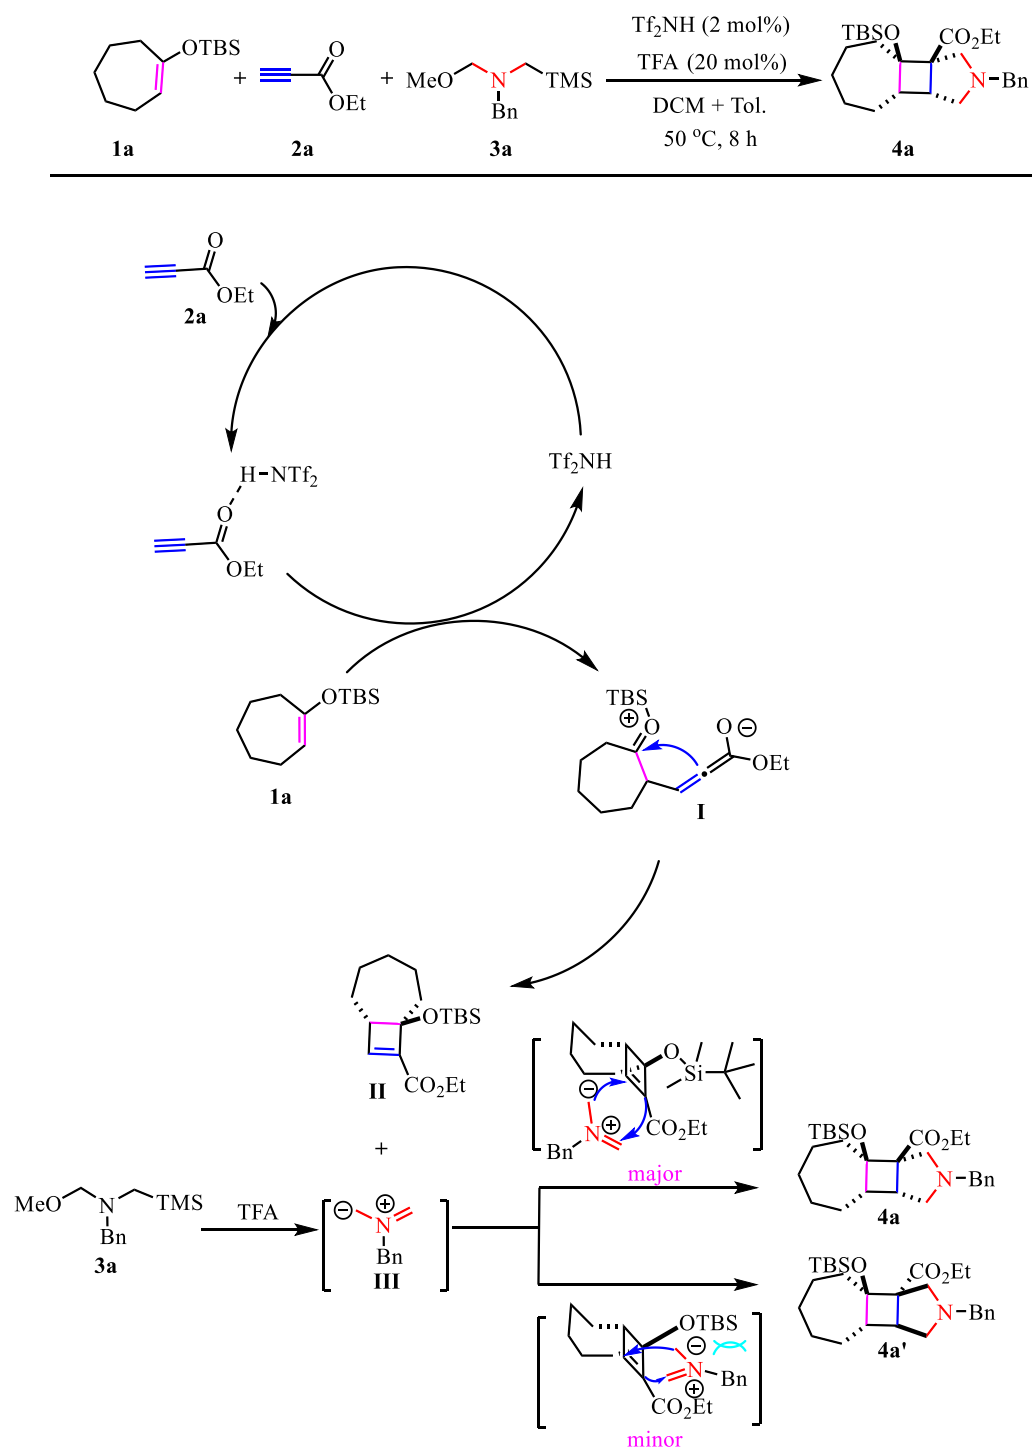

A proposed reaction mechanism is depicted in part VII in SI. Initially, ethyl propiolate **2a** was activated by  $\text{Tf}_2\text{NH}$ , and this Lewis acid promoted a Mukaiyama - Michael addition reaction of **1a** and activated **2a** to give the intermediate **I**. Intermediate **I** underwent an intramolecular aldol reaction to give intermediate **II**. **3a** in the presence

of trifluoroacetic acid generated methylenimine ylide **III**, which undergoes a [3+2] cycloaddition reaction with **II** to give the final product **4a** as diastereomeric mixtures. Due to the steric hindrance of TBS, **4a** as the major product was obtained, and the minor product was **4a'**.

## VIII. References

- (1) T. Kang, W. Cao, L. Hou, Q. Tang, S. Zou, X. Liu, X. Feng, Chiral Zinc(II)-Catalyzed Enantioselective Tandem  $\alpha$ -Alkenyl Addition/Proton Shift Reaction of Silyl Enol Ethers with Ketimines, *Angew. Chem. Int. Edit.*, 2019, **58**, 2464–2468.
- (2) F. C. E. Sarabèr, A. Baranovsky, B. J. M. Jansen, M. A. Posthumus, A. de Groot, New Approaches toward the Synthesis of (D-Homo) Steroid Skeletons Using Mukaiyama Reactions, *Tetrahedron*, 2006, **62**, 1726–1742.
- (3) J. Zhang, L. Wang, Q. Liu, Z. Yang, Y. Huang, Synthesis of  $\alpha,\beta$ -Unsaturated Carbonyl Compounds via a Visible-Light-Promoted Organocatalytic Aerobic Oxidation, *Chem. Commun.*, 2013, **49**, 11662–11664.
- (4) Caldora, H. P.; Zhang, Z.; M. J. Tilby, O. Turner, D. Leonori, Dual Photochemical H-Atom Transfer and Cobalt Catalysis for the Desaturative Synthesis of Phenols from Cyclohexanones, *Angew. Chem. Int. Edit.*, 2023, **62**, e202301656.
- (5) M. Lee, J. Heo, D. Kim, S. Chang, On the Origin of Rh-Catalyzed Selective Ring-Opening Amidation of Substituted Cyclopropanols to Access  $\beta$ -Amino Ketones, *J. Am. Chem. Soc.*, 2022, **144**, 3667–3675.
- (6) S. D. Schnell, J. A. González, J. Sklyaruk, A. Linden, K. Gademann, Boron Trifluoride-Mediated Cycloaddition of 3-Bromotetrazine and Silyl Enol Ethers: Synthesis of 3-Bromo-Pyridazines, *J. Org. Chem.*, 2021, **86**, 12008–12023.
- (7) Q. Chen, S. Tanaka, T. Fujita, L. Chen, T. Minato, Y. Ishikawa, M. Chen, N. Asao, Y. Yamamoto, T. Jin, The Synergistic Effect of Nanoporous AuPd Alloy Catalysts on Highly Chemoselective 1,4-Hydrosilylation of Conjugated Cyclic Enones, *Chem. Commun.*, 2014, **50**, 3344–3346.
- (8) K. Takasu, S. Nagao, M. Ueno, M. Ihara, An Auxiliary Induced Asymmetric Synthesis of Functionalized Cyclobutanes by Means of Catalytic (2+2)-

- Cycloaddition Reaction, *Tetrahedron*, 2004, **60**, 2071–2078.
- (9) W. Dong, Z. Ye, W. Zhao, Enantioselective Cobalt-Catalyzed Hydroboration of Ketone-Derived Silyl Enol Ethers, *Angew. Chem. Int. Edit.*, 2022, **61**, e202117413.
- (10) S. Hajra, M. Bhowmick, B. Maji, D. Sinha, Design and Synthesis of Chiral N-Chloroimidodicarbonates: Application to Asymmetric Chlorination of Silyl Enol Ethers, *J. Org. Chem.*, 2007, **72**, 4872–4876.
- (11) D. Perrotta, S. Racine, J. Vuilleumier, F. de Nanteuil, J. Waser, [4 + 2]-Annulations of Aminocyclobutanes, *Org. Lett.*, 2015, **17**, 1030–1033.
- (12) J. Duran, J. Mateos, A. Moyano, X. Companyó, Catalytic Asymmetric Defluorinative Allylation of Silyl Enol Ethers, *Chem. Sci.*, 2023, **14**, 7147–7153.
- (13) T. Hirata, Y. Ogasawara, Y. Yamashita, S. Kobayashi,  $\alpha$ -Alkylation of Ketones with Alkenes Enabled by Photoinduced Activation of Silyl Enol Ethers in the Presence of a Small Amount of Water, *Org. Lett.*, 2021, **23**, 5693–5697.
- (14) T. Ito, M. Tsutsumi, K. Yamada, H. Takikawa, Y. Yamaoka, K. Takasu. Synthesis of Functionalized Medium-Sized Trans-Cycloalkenes by  $4\pi$  Electrocyclic Ring Opening/Alkylation Sequence, *Angew. Chem. Int. Edit.*, 2019, **58**, 11836–11840.



## IX. NMR Spectral Data

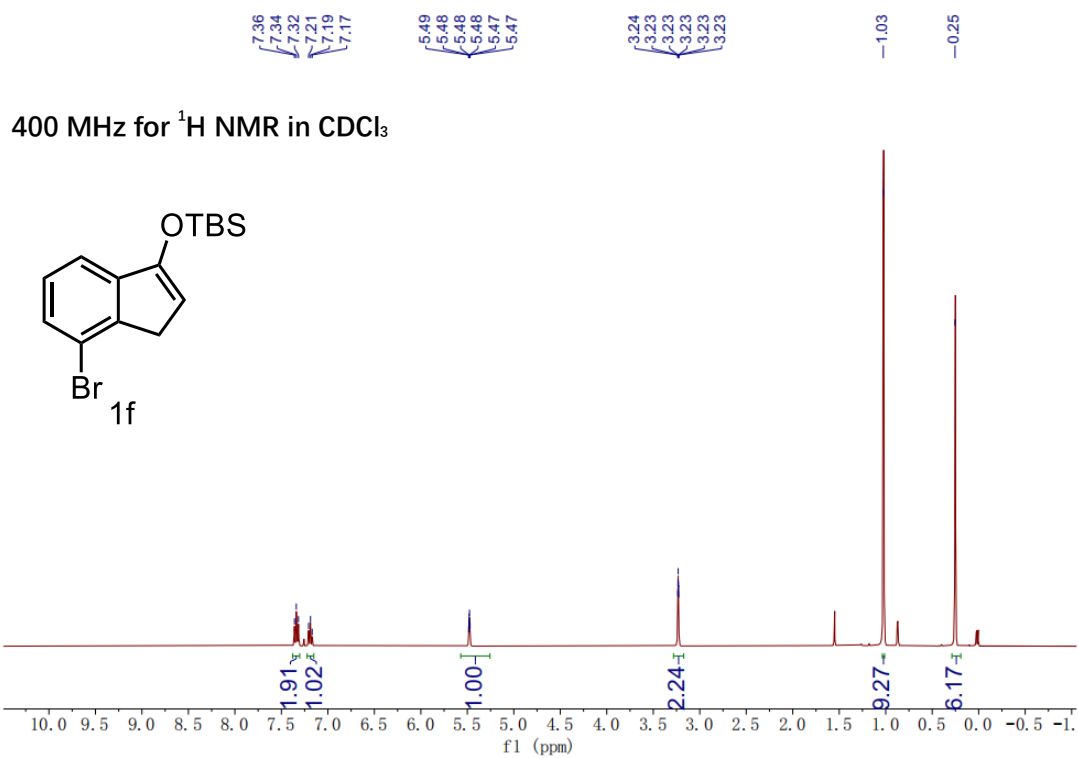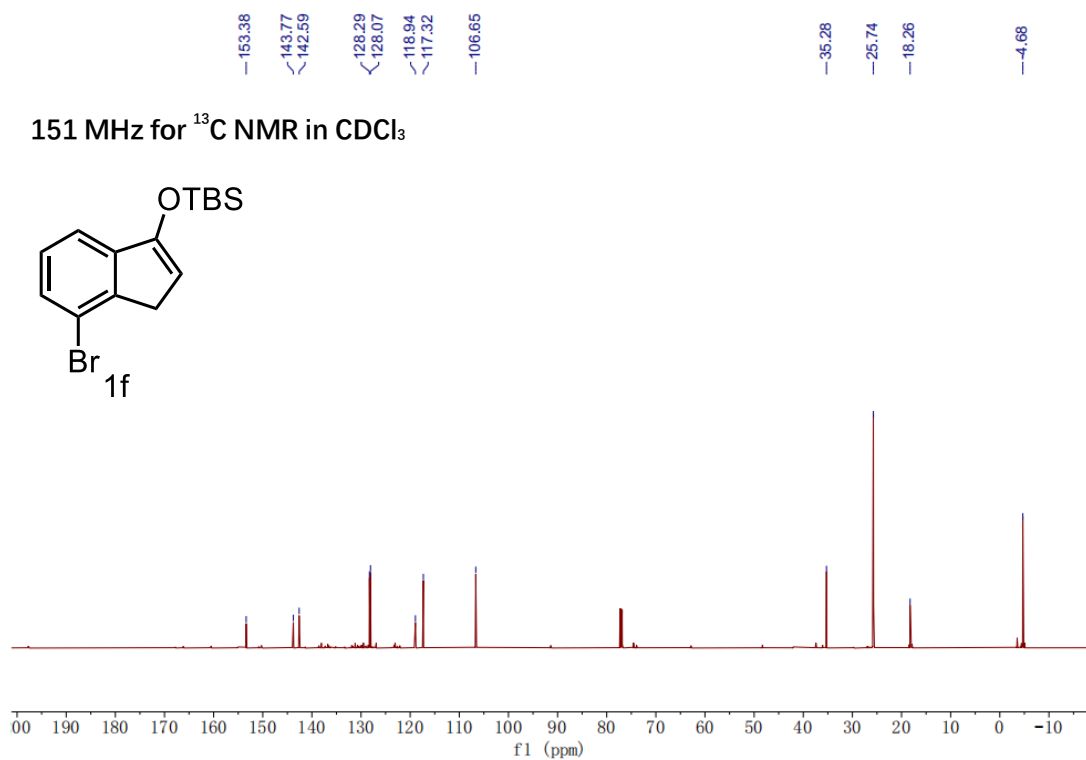

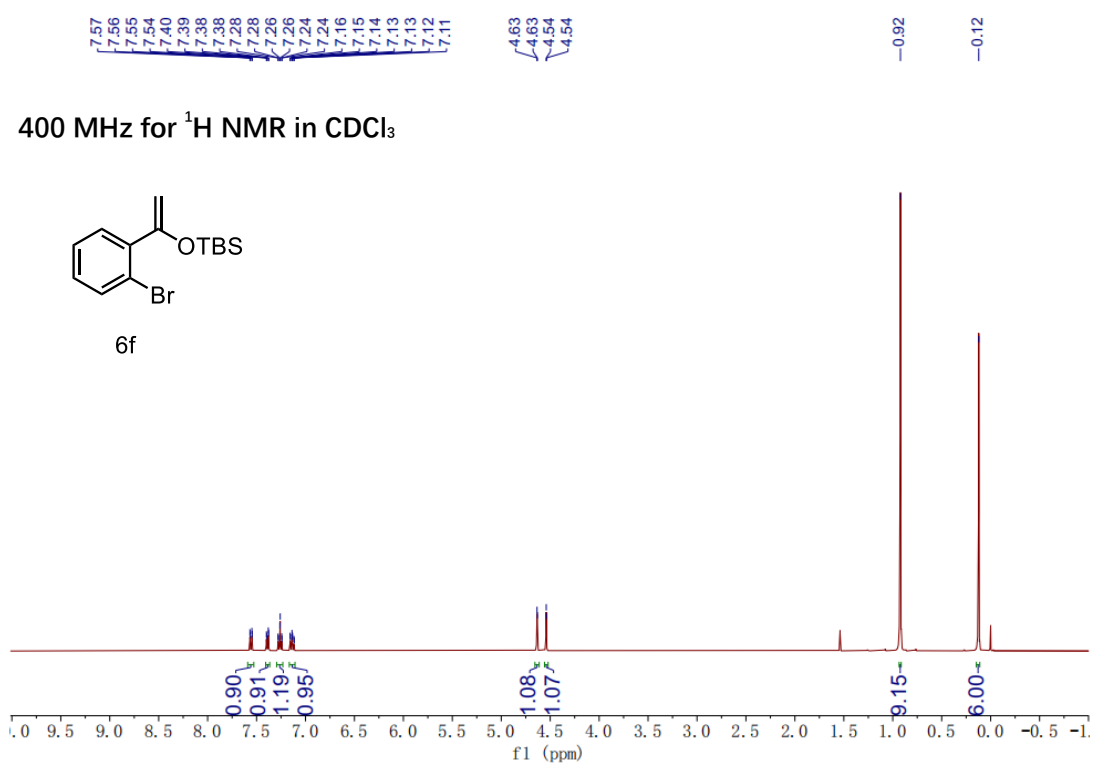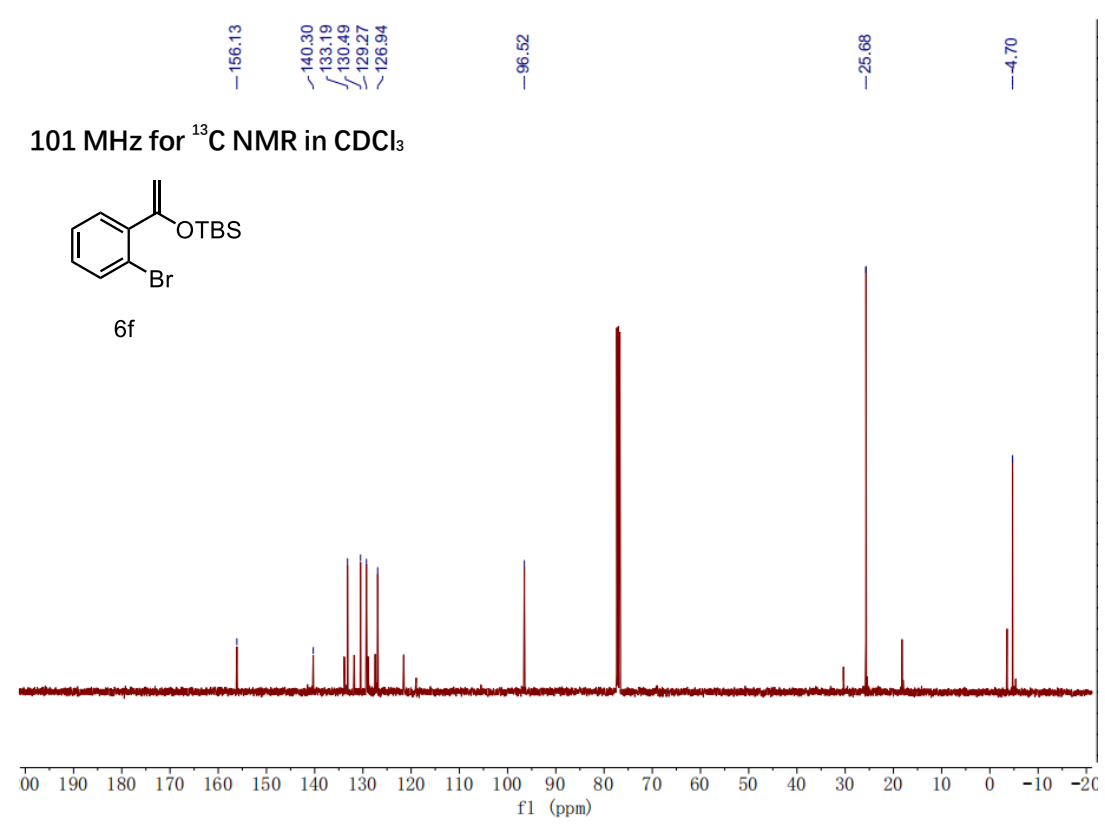

7.35  
7.34  
7.31  
7.30  
7.29  
7.25  
7.24  
7.22  
4.19  
4.18  
4.17  
4.16  
4.15  
4.13  
4.12  
4.11  
4.10  
3.74  
3.72  
3.53  
3.51  
3.49  
2.67  
2.66  
2.41  
2.40  
2.38  
2.37  
2.23  
2.22  
2.21  
2.20  
2.19  
1.81  
1.81  
1.80  
1.79  
1.78  
1.77  
1.69  
1.68  
1.67  
1.65  
1.63  
1.62  
1.37  
1.36  
1.35  
1.34  
1.33  
1.31  
1.31  
1.30  
1.28  
1.27  
1.25  
0.92  
0.09

600 MHz for  $^1\text{H}$  NMR in  $\text{CDCl}_3$

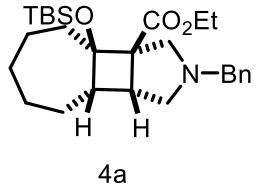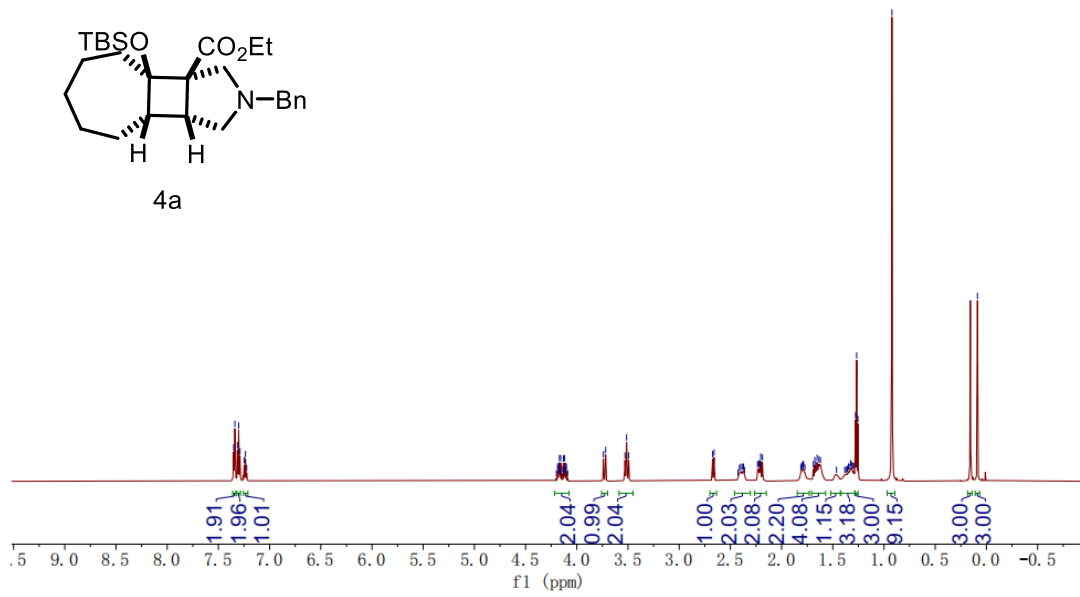

-174.00  
-130.48  
128.78  
128.12  
126.74  
-80.06  
60.28  
60.12  
59.71  
58.08  
57.90  
49.61  
31.89  
26.31  
26.09  
24.25  
18.69  
14.34  
1.92  
1.96

151 MHz for  $^{13}\text{C}$  NMR in  $\text{CDCl}_3$

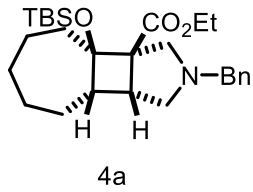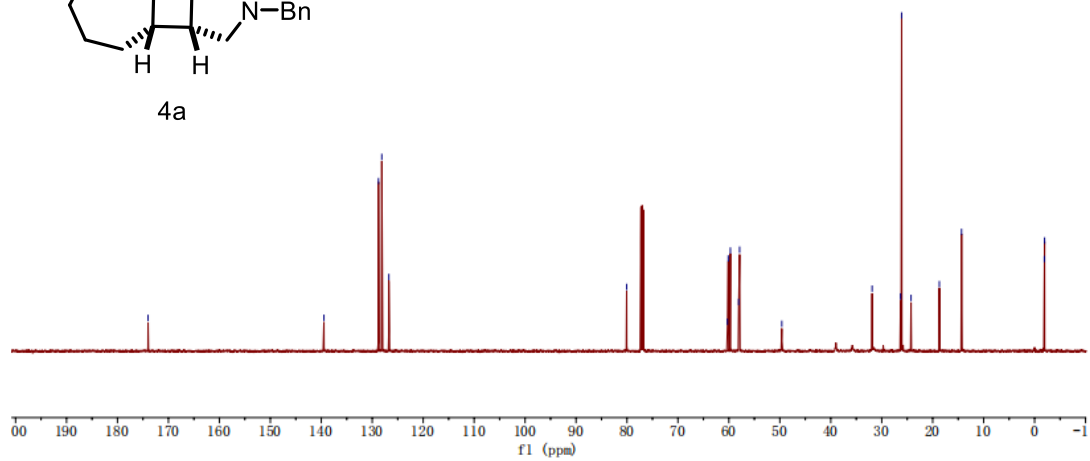

7.34  
7.33  
7.31  
7.29  
7.28  
7.24  
7.23  
7.22  
4.18  
4.17  
4.16  
4.15  
4.11  
4.09  
4.08  
3.68  
3.63  
3.51  
3.49  
2.71  
2.69  
2.54  
2.53  
2.52  
2.44  
2.44  
2.43  
2.42  
2.32  
2.31  
2.31  
2.20  
2.18  
1.82  
1.80  
1.58  
1.57  
1.56  
1.55  
1.54  
1.53  
1.50  
1.50  
1.48  
1.47  
1.47  
1.39  
1.38  
1.34  
1.32  
1.30  
1.29  
1.28  
1.27  
1.26  
1.25  
1.23  
0.87  
0.14  
0.07

600 MHz for  $^1\text{H}$  NMR in  $\text{CDCl}_3$

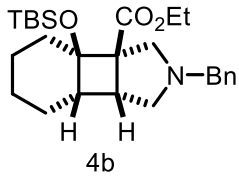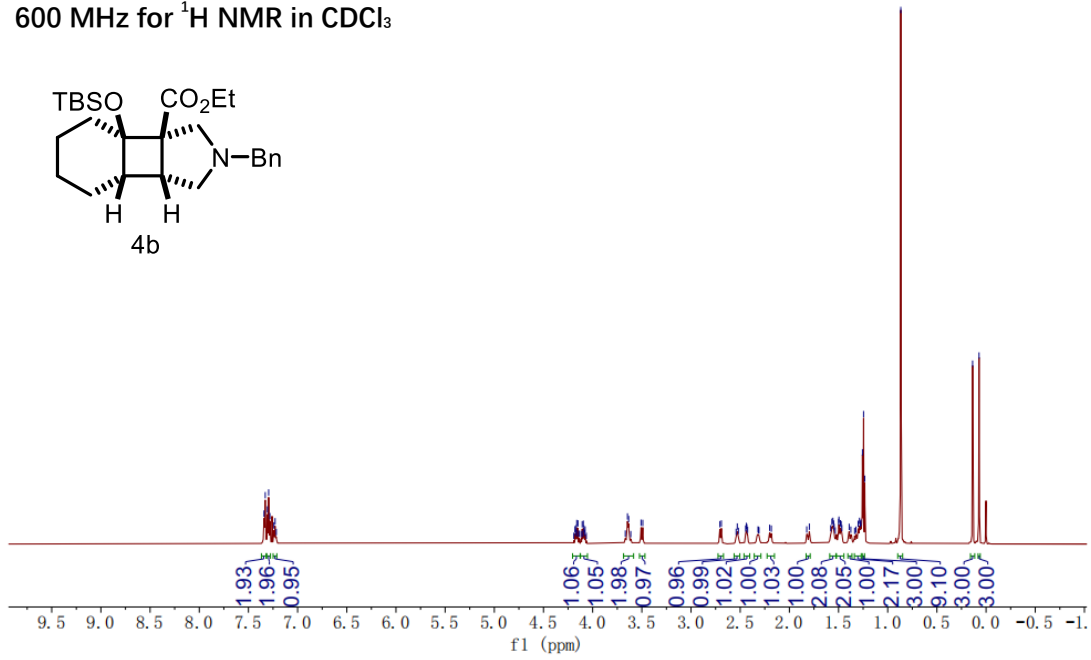

174.43  
139.56  
128.63  
128.13  
126.71  
73.17  
62.33  
60.03  
59.69  
56.79  
42.24  
37.84  
34.59  
25.82  
23.30  
21.20  
20.54  
18.34  
14.32  
14.11  
2.50  
2.55

151 MHz for  $^{13}\text{C}$  NMR in  $\text{CDCl}_3$

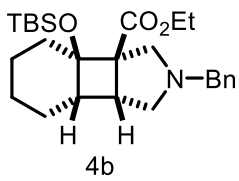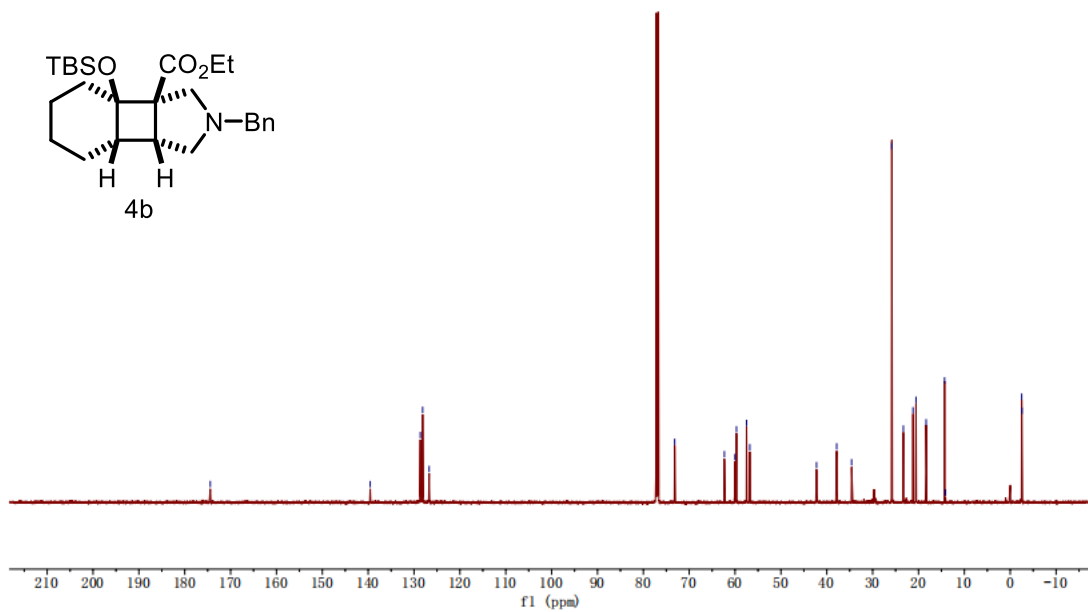

7.36  
7.35  
7.31  
7.30  
7.29  
7.26  
7.25  
7.23  
7.22  
4.17  
4.16  
4.15  
4.13  
4.13  
4.12  
3.84  
3.62  
3.63  
3.62  
3.40  
3.38  
2.74  
2.72  
2.27  
2.26  
2.25  
2.18  
2.17  
2.16  
2.14  
2.13  
2.11  
2.10  
2.09  
2.09  
1.81  
1.80  
1.78  
1.78  
1.73  
1.72  
1.72  
1.71  
1.71  
1.70  
1.70  
1.69  
1.68  
1.61  
1.61  
1.59  
1.51  
1.50  
1.49  
1.27  
1.26  
1.25  
0.90  
0.15  
0.06

600 MHz for  $^1\text{H}$  NMR in  $\text{CDCl}_3$

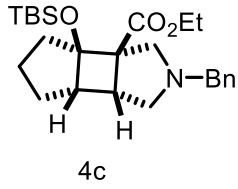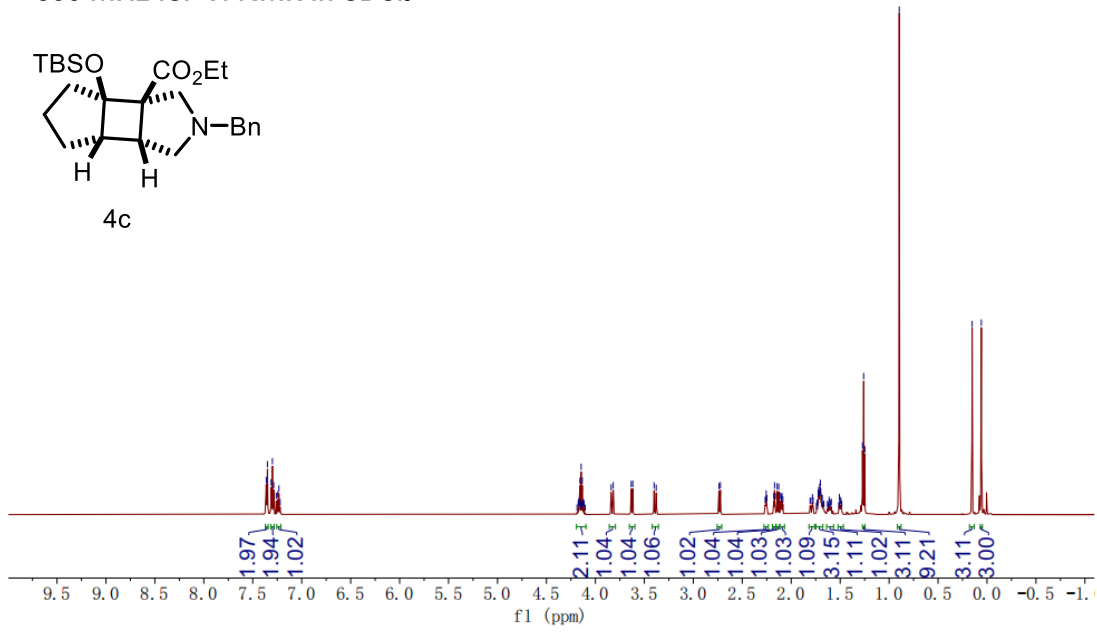

-173.28  
-139.42  
128.87  
128.97  
128.71  
-82.66  
60.06  
59.98  
59.81  
58.66  
57.98  
-48.98  
38.50  
38.36  
31.12  
25.83  
24.30  
-18.22  
-14.34  
-2.52  
-2.65

151 MHz for  $^{13}\text{C}$  NMR in  $\text{CDCl}_3$

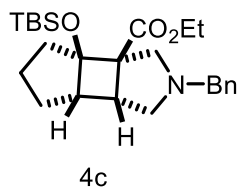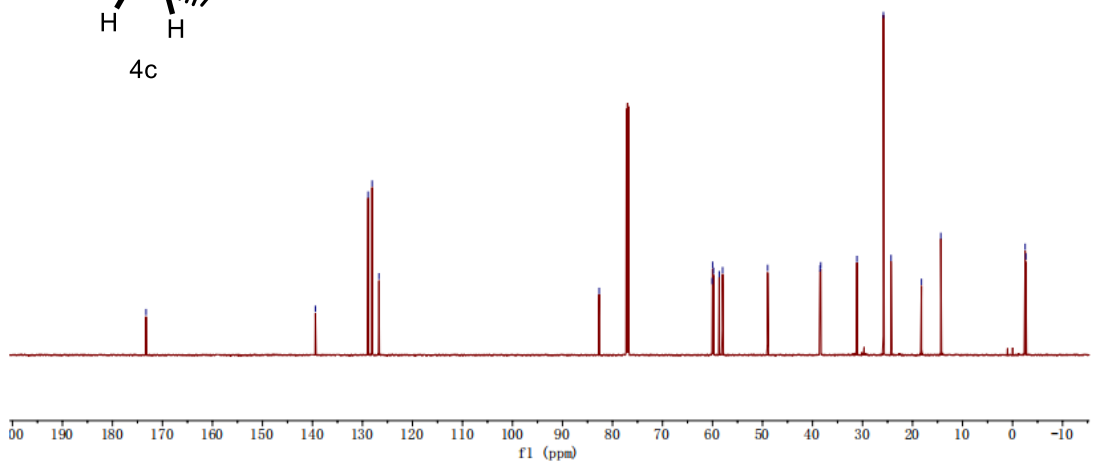

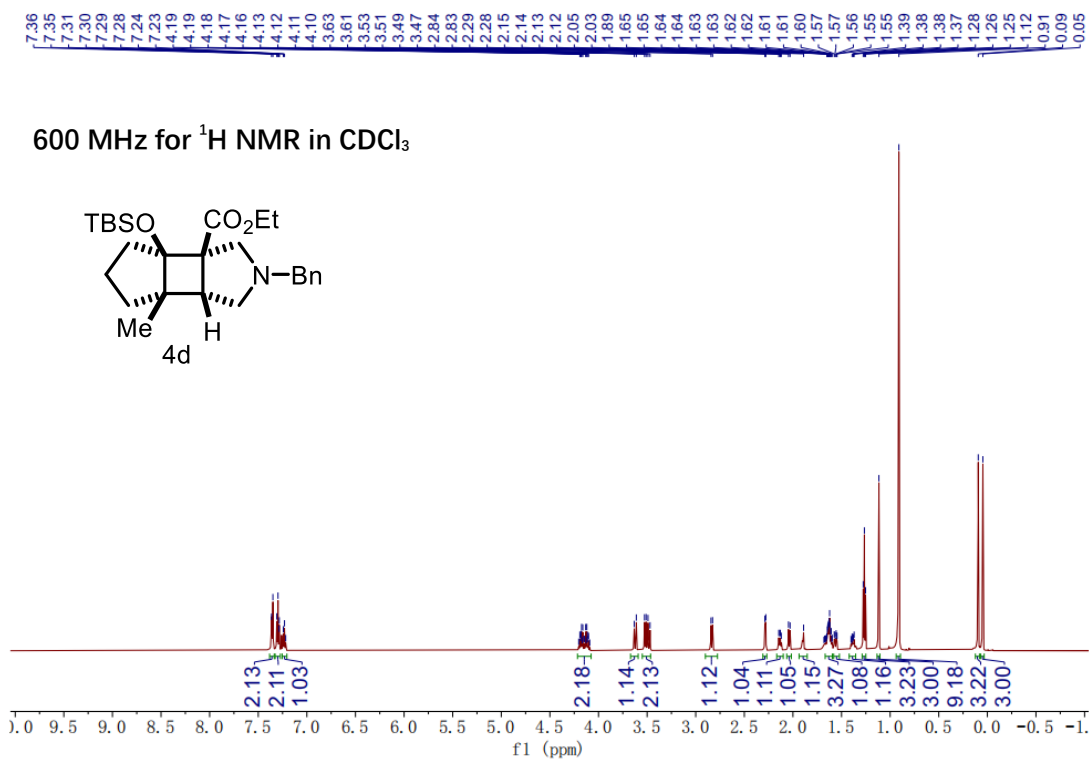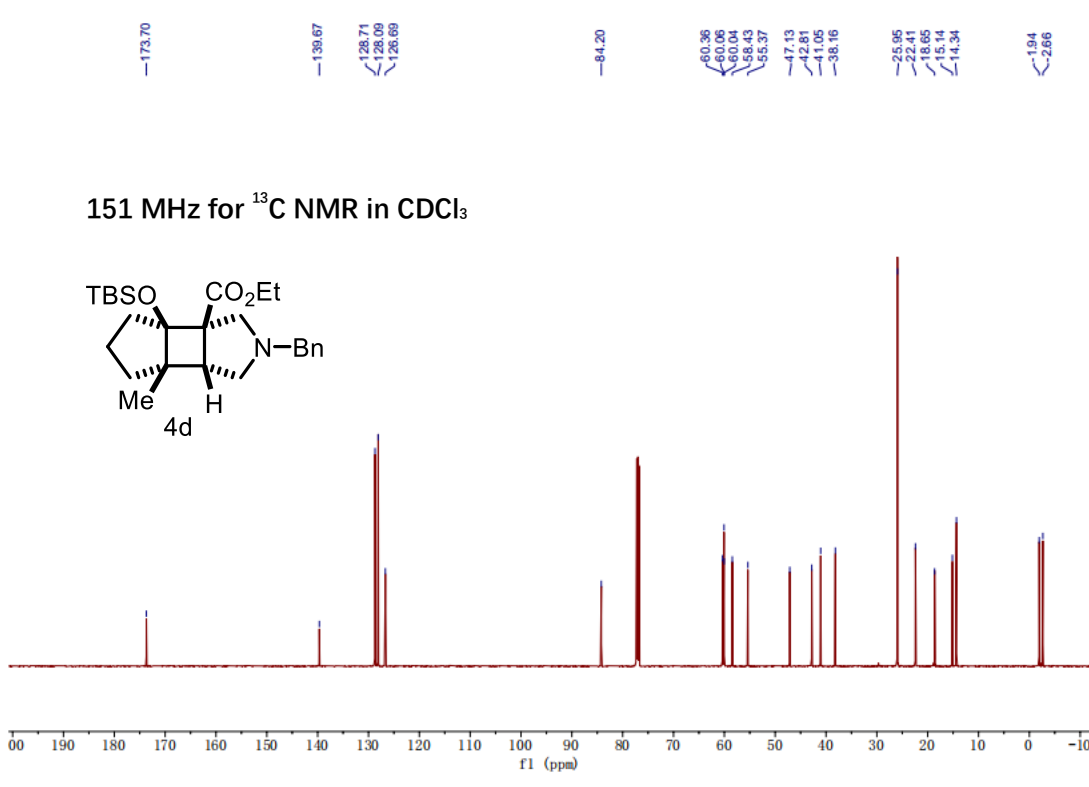

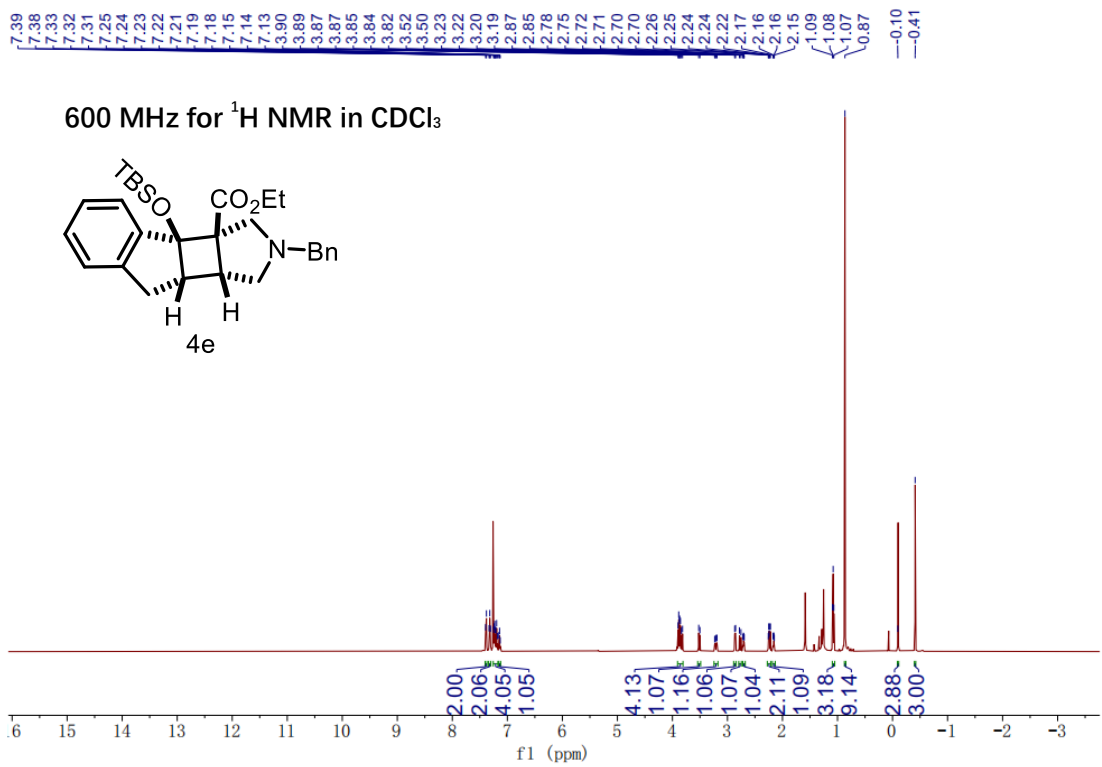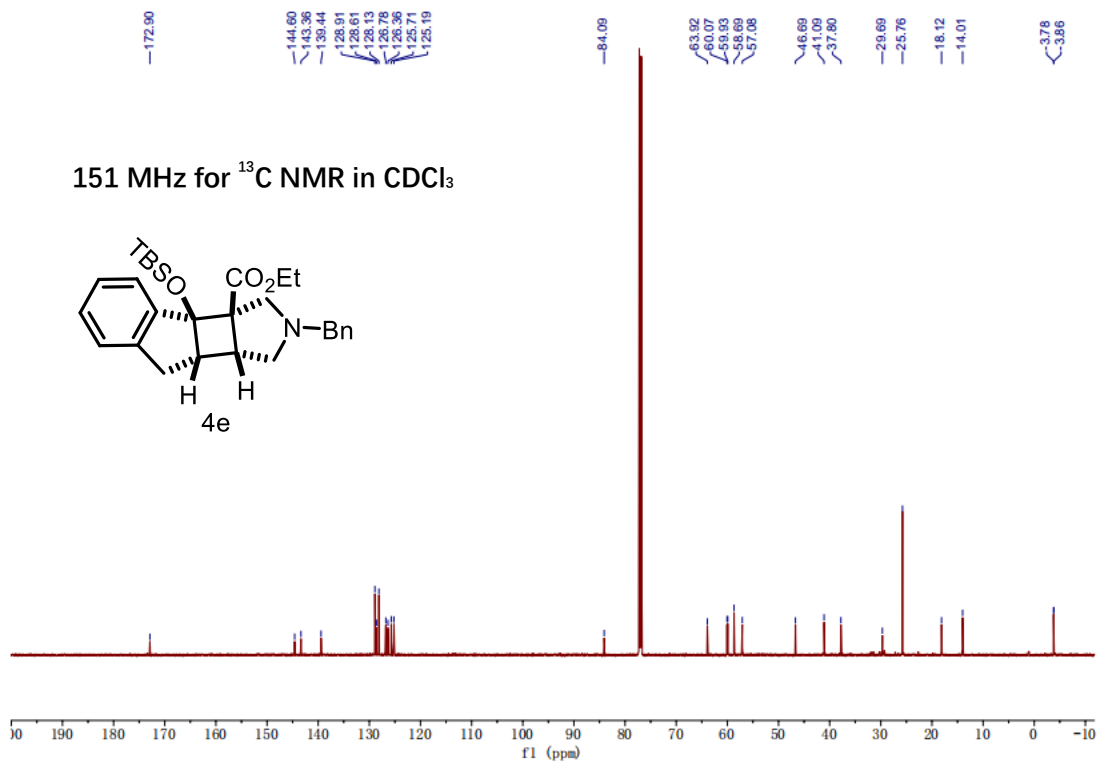

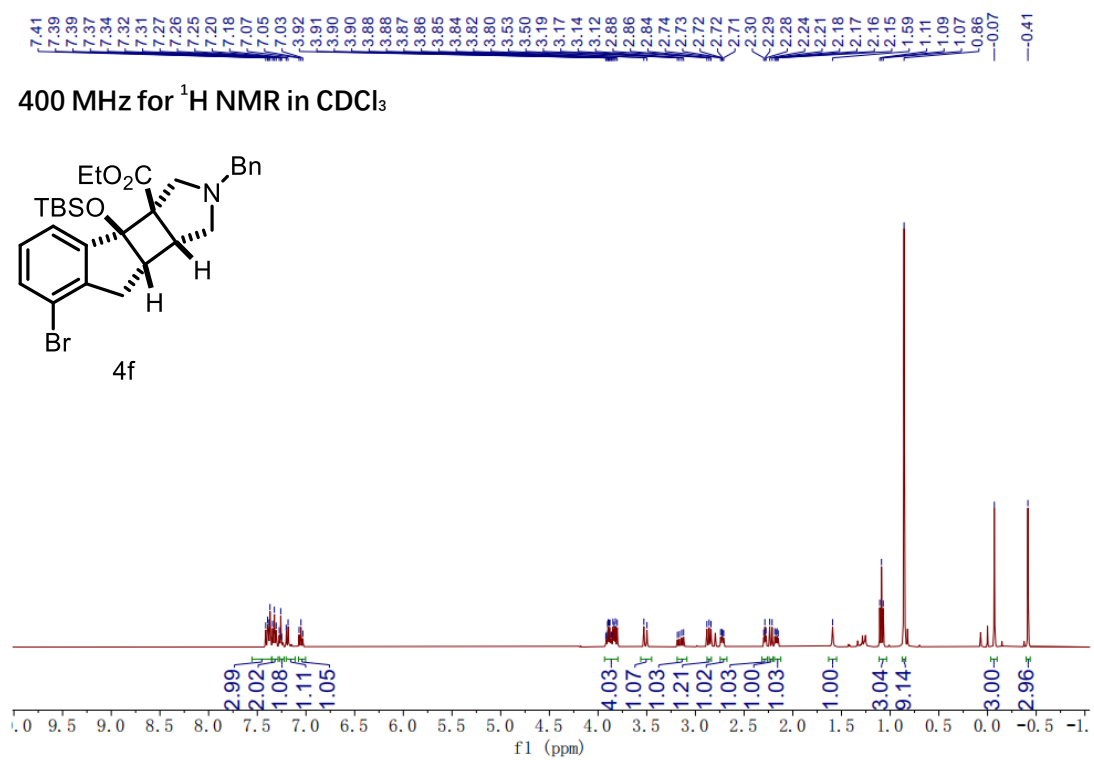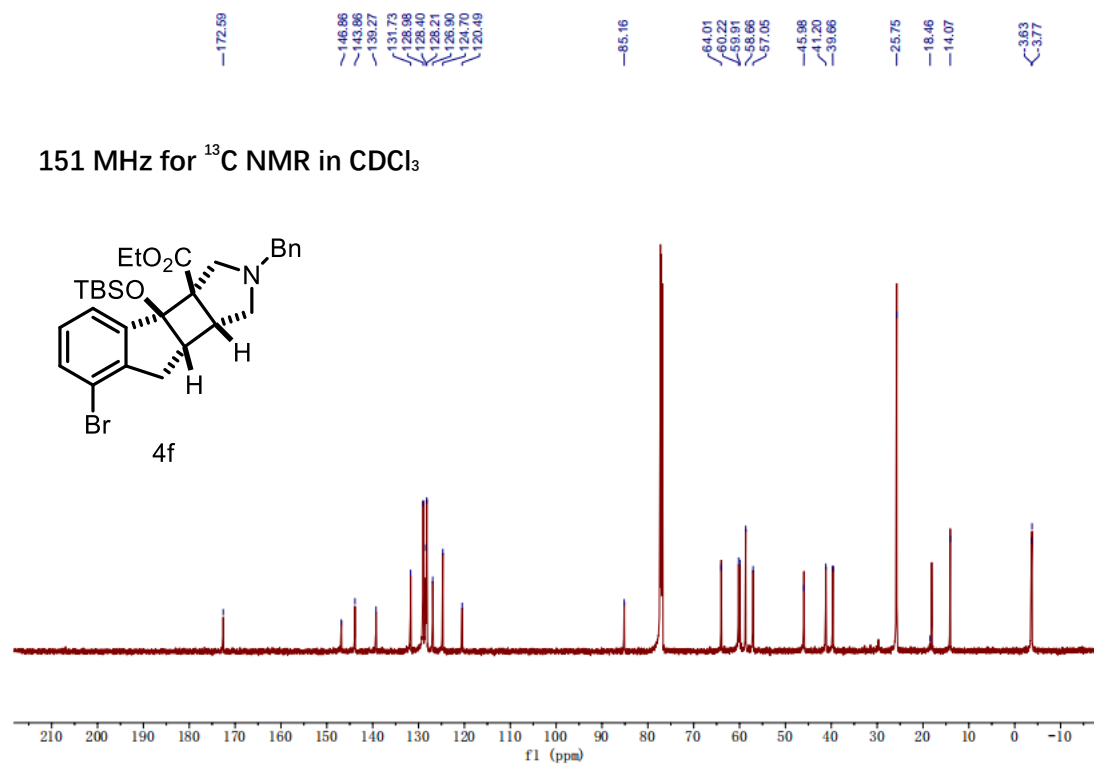



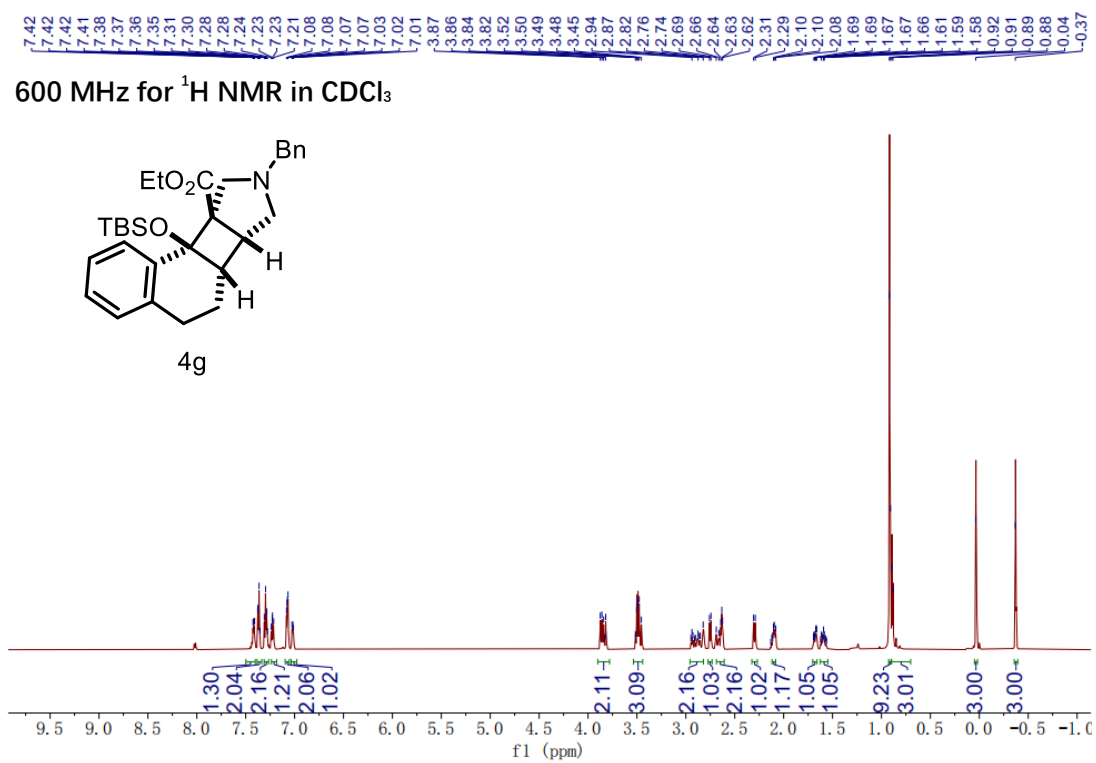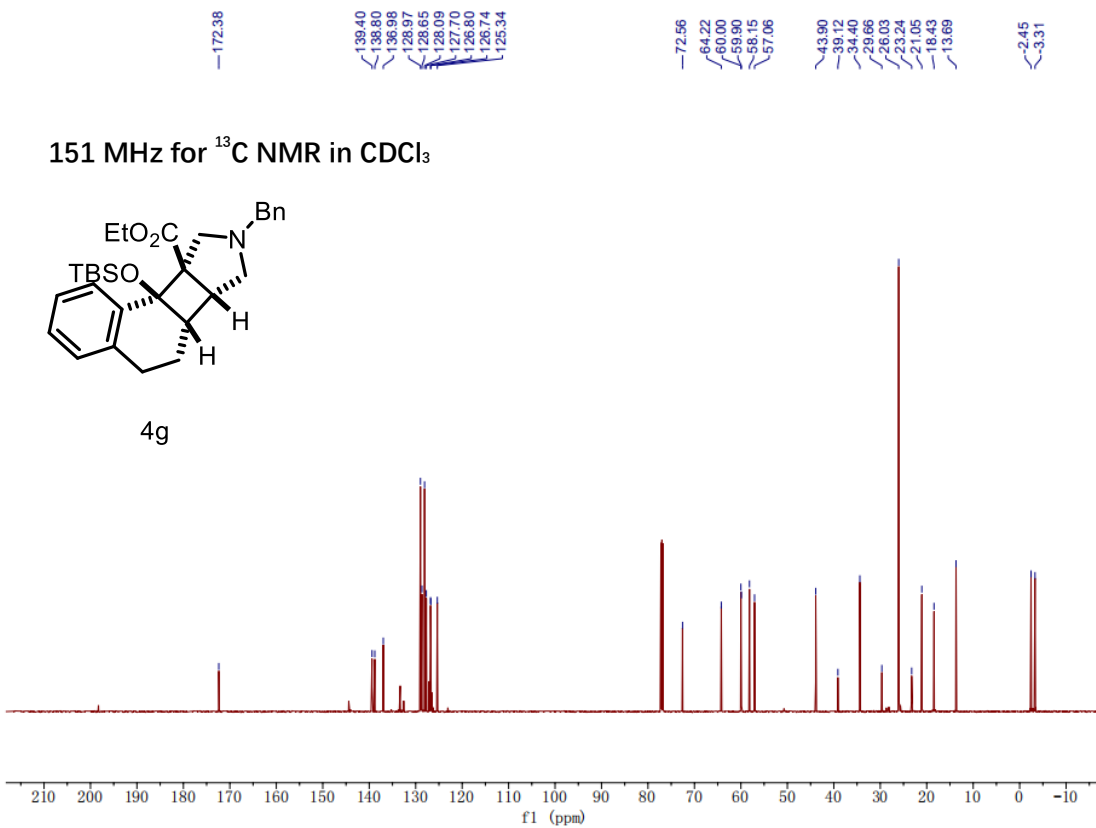

7.21  
7.19  
7.18  
7.17  
7.15  
7.14  
7.13  
7.11  
7.10  
7.08  
7.07  
7.06  
7.03  
7.02  
7.01  
7.00  
6.99  
6.99  
4.02  
4.01  
4.01  
4.00  
3.99  
3.98  
3.96  
3.50  
3.49  
3.48  
3.37  
3.36  
3.35  
3.34  
3.34  
2.63  
2.62  
2.59  
2.57  
2.42  
2.42  
2.41  
2.40  
2.40  
2.25  
2.24  
2.24  
2.08  
2.06  
2.01  
2.01  
1.86  
1.58  
1.53  
1.52  
1.51  
1.50  
1.12  
1.11  
1.10  
1.09  
0.79  
0.73  
0.02  
0.00  
0.03

600 MHz for  $^1\text{H}$  NMR in  $\text{CDCl}_3$

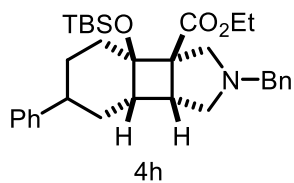

4h was a 1:1:1 diastereoisomeric mixture

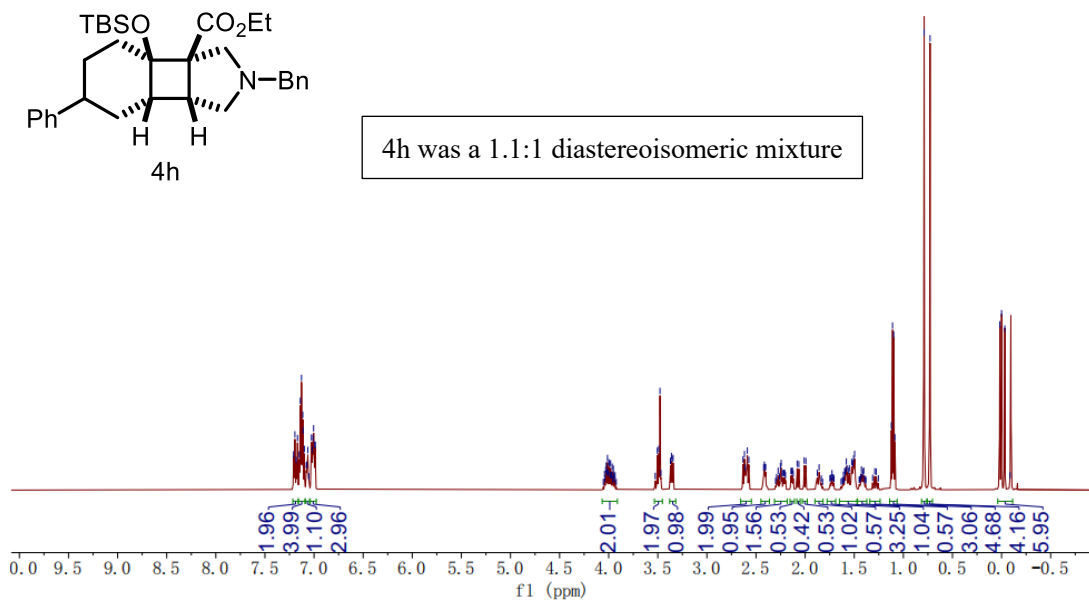

174.40  
173.83  
148.19  
147.25  
138.50  
138.41  
138.40  
138.50  
138.36  
138.36  
128.14  
128.14  
128.80  
126.78  
126.74  
125.99  
125.75  
74.34  
72.33  
62.31  
60.22  
60.14  
59.65  
59.58  
58.38  
57.33  
57.29  
56.43  
45.57  
42.73  
41.77  
40.25  
37.78  
36.51  
36.13  
32.32  
31.75  
28.50  
28.45  
27.49  
25.92  
25.81  
18.55  
18.34  
14.38  
14.33  
2.45  
2.52

151 MHz for  $^{13}\text{C}$  NMR in  $\text{CDCl}_3$

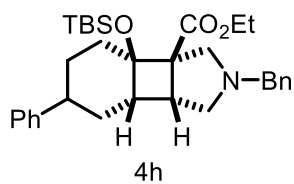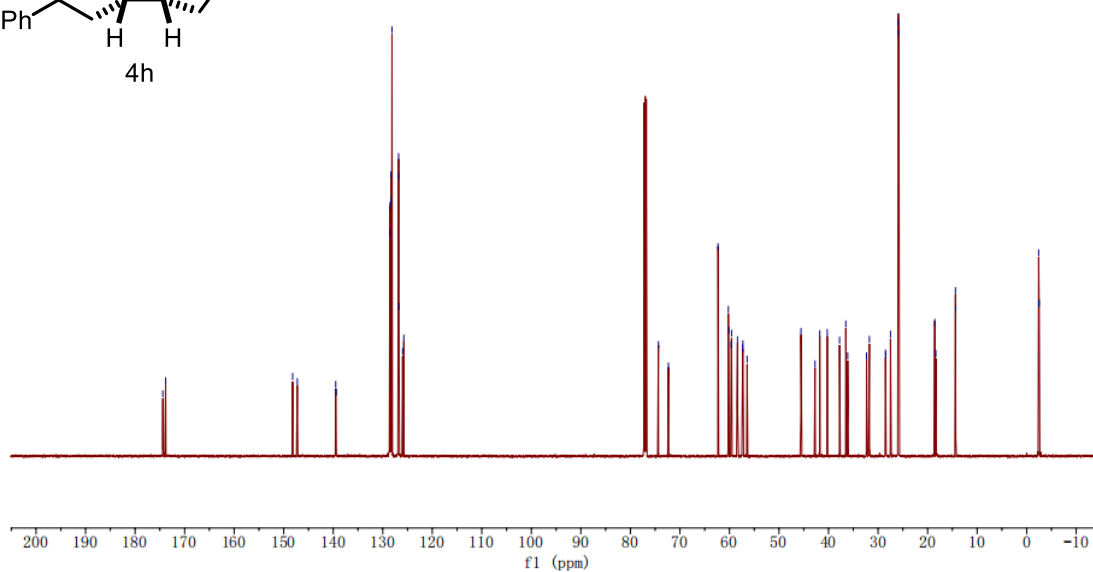

7.37  
7.36  
7.34  
7.33  
7.32  
7.31  
7.30  
7.28  
7.25  
7.24  
7.23  
4.18  
4.17  
4.16  
4.15  
4.13  
4.12  
4.10  
3.67  
3.63  
3.62  
3.51  
3.50  
3.48  
3.47  
2.78  
2.77  
2.71  
2.70  
2.29  
2.28  
2.27  
2.21  
2.12  
2.11  
1.81  
1.81  
1.60  
1.53  
1.51  
1.51  
1.30  
1.29  
1.29  
1.28  
1.28  
1.27  
1.27  
1.26  
1.25  
1.25  
1.24  
1.24  
0.90  
0.87  
0.83  
0.80  
0.15  
0.13  
0.08  
0.02

600 MHz for  $^1\text{H}$  NMR in  $\text{CDCl}_3$

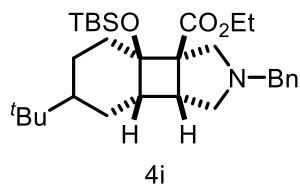

4i was a 1.3:1 diastereoisomeric mixture

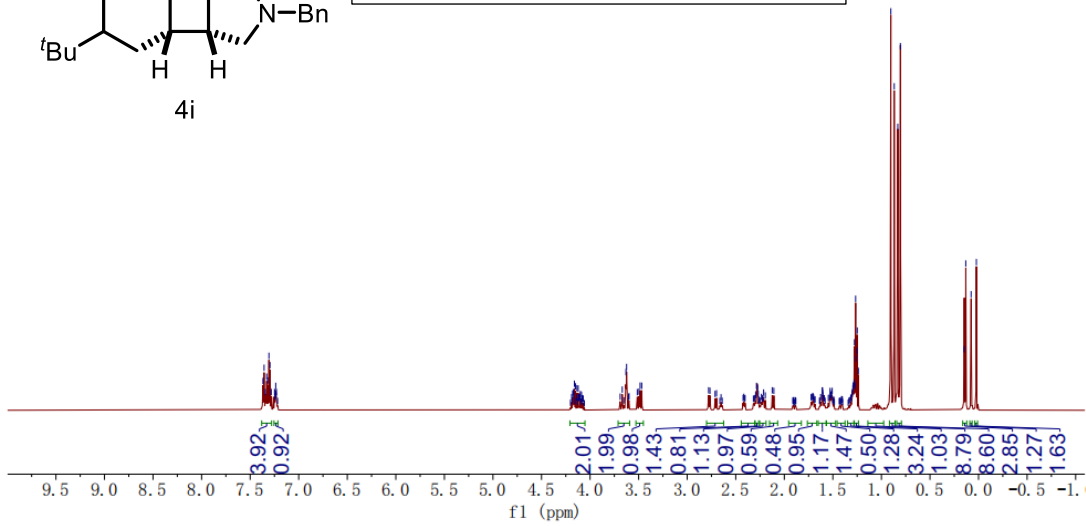

174.55  
173.99  
138.56  
128.63  
128.59  
128.12  
126.71

151 MHz for  $^{13}\text{C}$  NMR in  $\text{CDCl}_3$

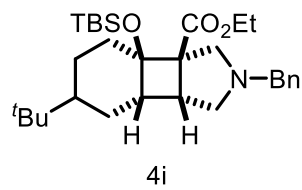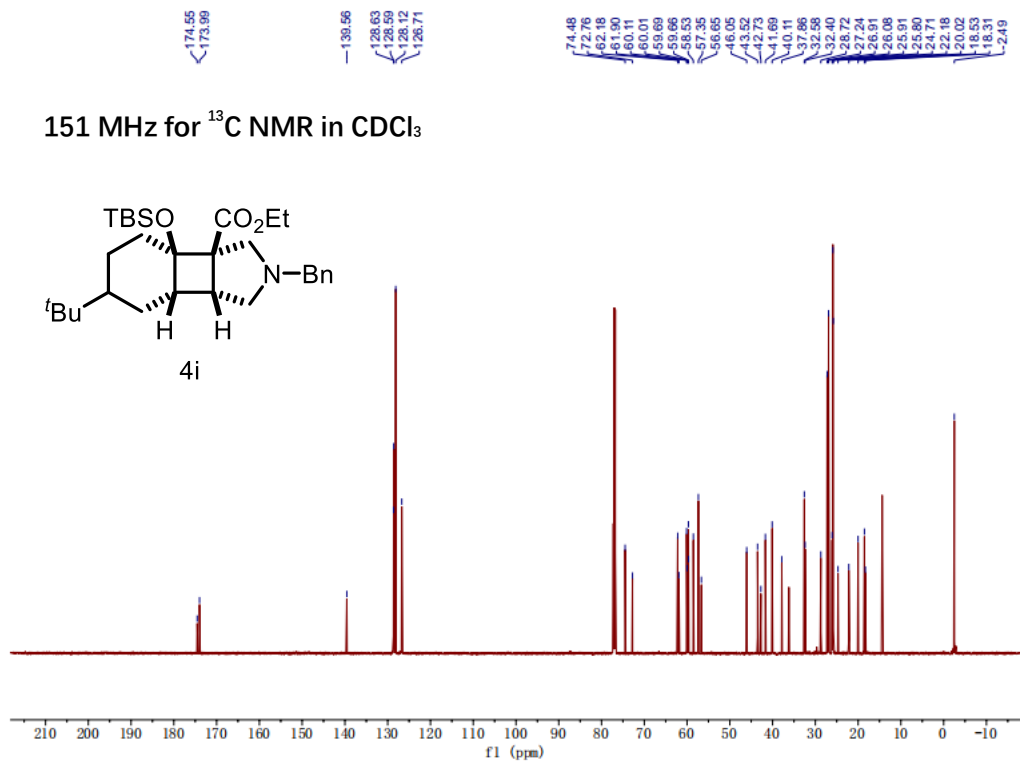

7.33  
7.32  
7.32  
7.31  
7.31  
7.31  
7.30  
7.30  
7.29  
7.29  
7.25  
7.25  
7.24  
7.24  
7.24  
7.23  
7.23  
4.19  
4.18  
4.18  
4.17  
4.17  
4.16  
4.16  
4.15  
4.15  
4.15  
4.15  
4.14  
4.14  
4.13  
4.12  
4.12  
4.11  
4.11  
3.67  
3.67  
3.65  
3.63  
3.51  
3.50  
3.50  
2.76  
2.75  
2.75  
2.74  
2.74  
2.73  
2.53  
2.53  
2.53  
2.52  
2.52  
2.52  
2.51  
2.51  
2.51  
2.32  
2.31  
2.30  
2.29  
2.29  
2.20  
2.18  
2.18  
1.92  
1.27  
1.26  
1.24  
0.87  
0.14  
0.07

600 MHz for  $^1\text{H}$  NMR in  $\text{CDCl}_3$

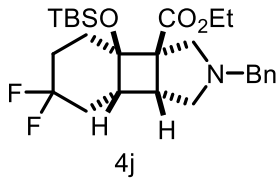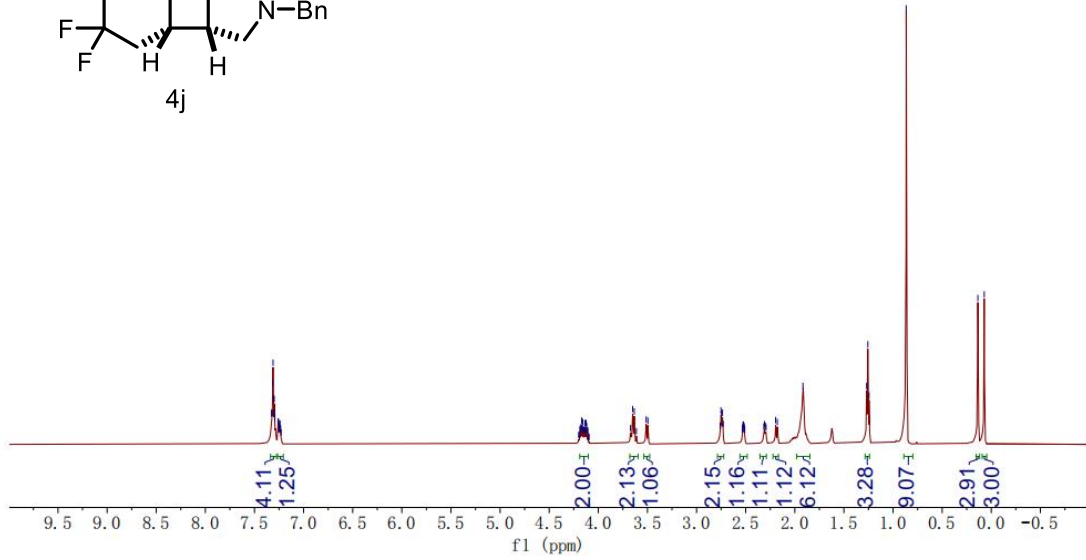

-173.67  
-139.24  
128.69  
128.24  
126.92  
-72.22  
61.64  
60.38  
59.49  
57.26  
56.71  
41.19  
41.14  
39.36  
32.70  
32.54  
32.37  
31.24  
29.79  
29.63  
29.46  
25.75  
16.32  
14.32  
-2.49  
-2.74

151 MHz for  $^{13}\text{C}$  NMR in  $\text{CDCl}_3$

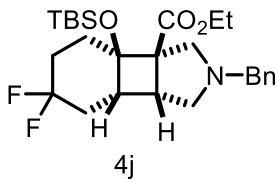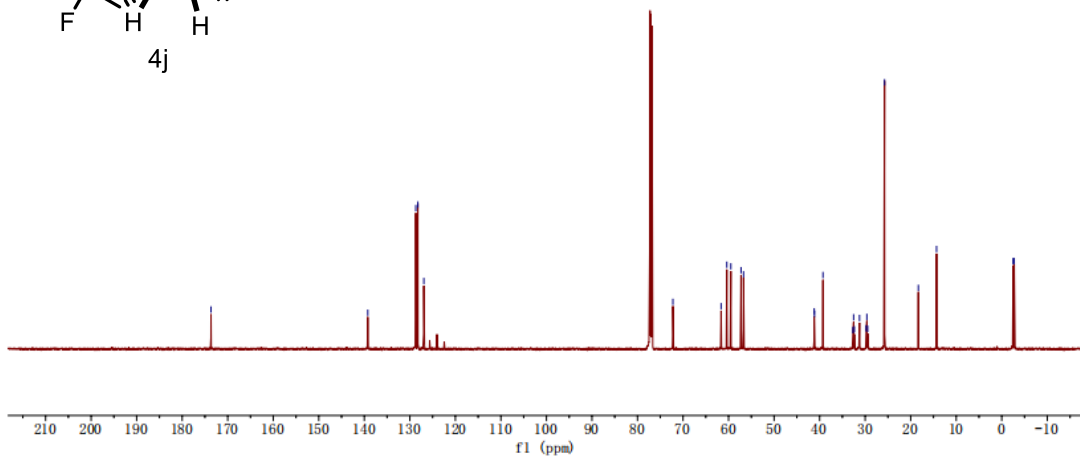

85.94  
86.28  
86.62  
88.05

565 MHz for  $^{19}\text{F}$  NMR in  $\text{CDCl}_3$

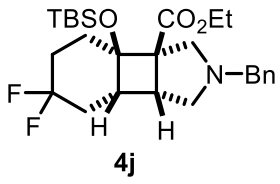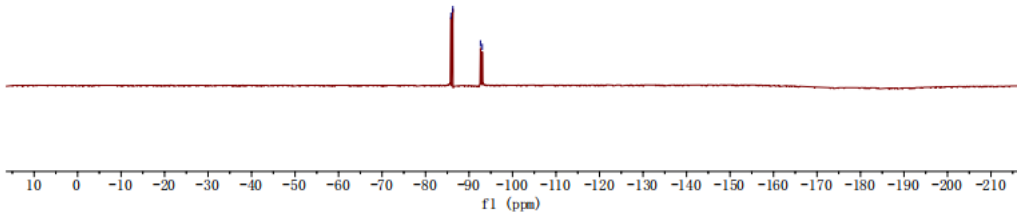

7.38  
7.36  
7.32  
7.31  
7.30  
7.25  
7.24  
7.23  
4.16  
4.15  
4.15  
4.14  
4.13  
4.13  
4.12  
3.72  
3.70  
3.58  
3.56  
3.42  
3.40  
2.71  
2.69  
2.31  
2.22  
2.21  
2.20  
2.20  
2.18  
1.84  
1.83  
1.82  
1.81  
1.80  
1.79  
1.74  
1.72  
1.70  
1.70  
1.69  
1.68  
1.67  
1.67  
1.66  
1.65  
1.62  
1.61  
1.60  
1.59  
1.58  
1.57  
1.56  
1.28  
1.27  
1.26  
1.25  
1.24  
1.24  
0.15

600 MHz for  $^1\text{H}$  NMR in  $\text{CDCl}_3$

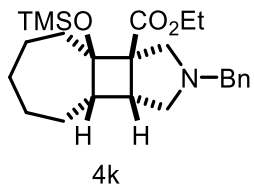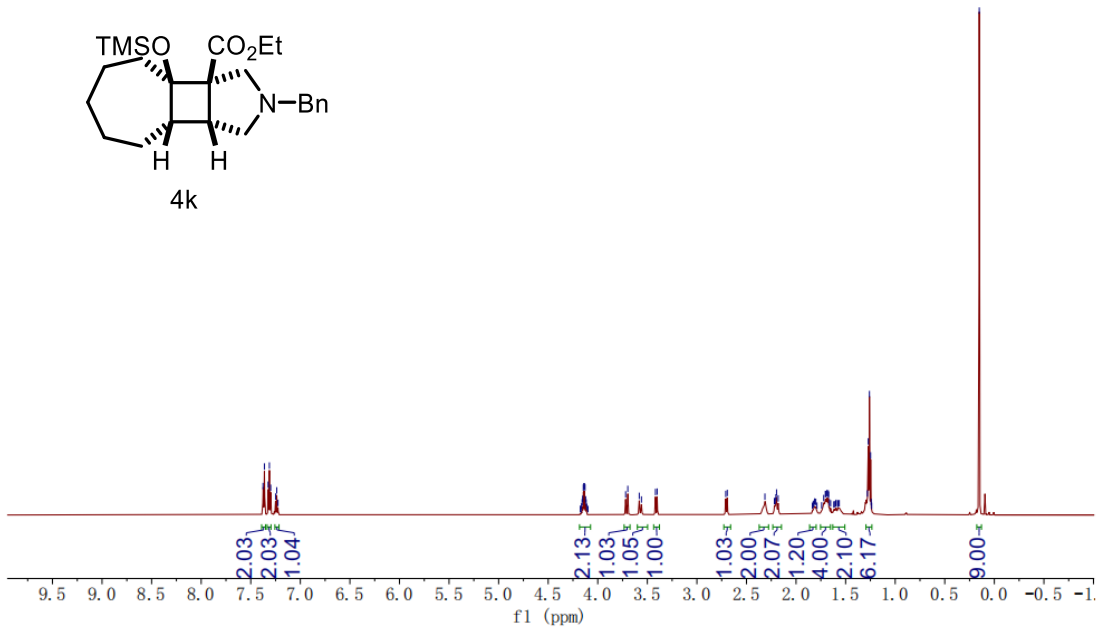

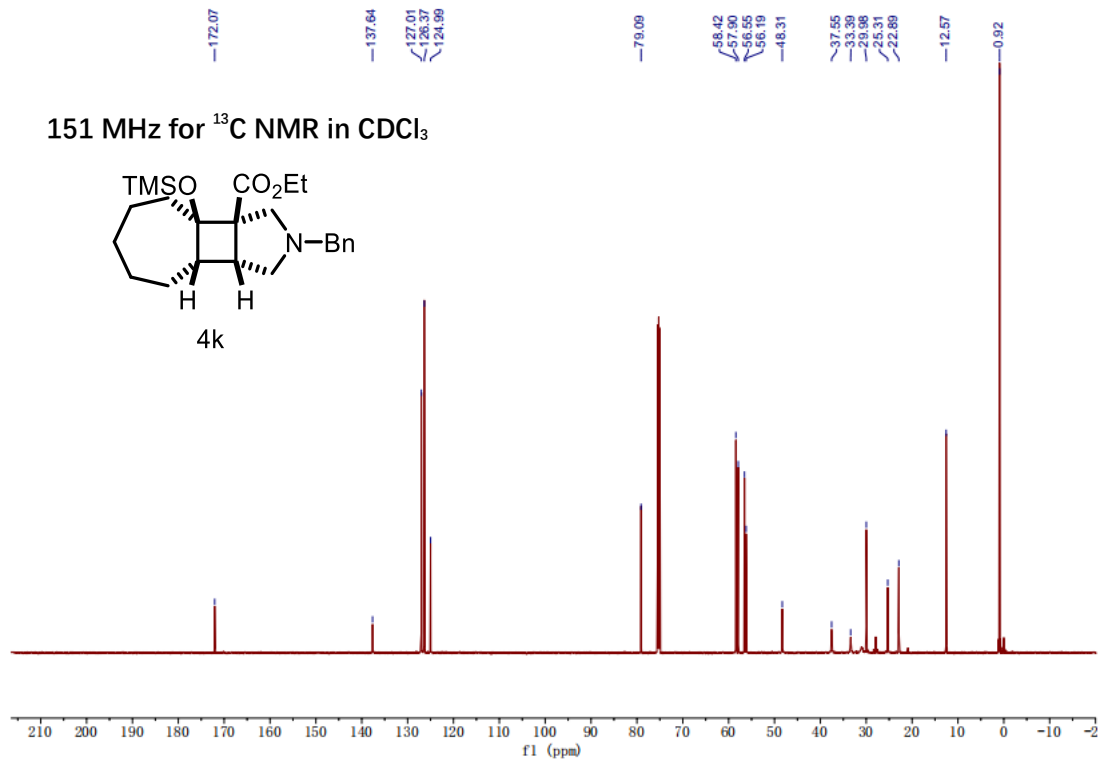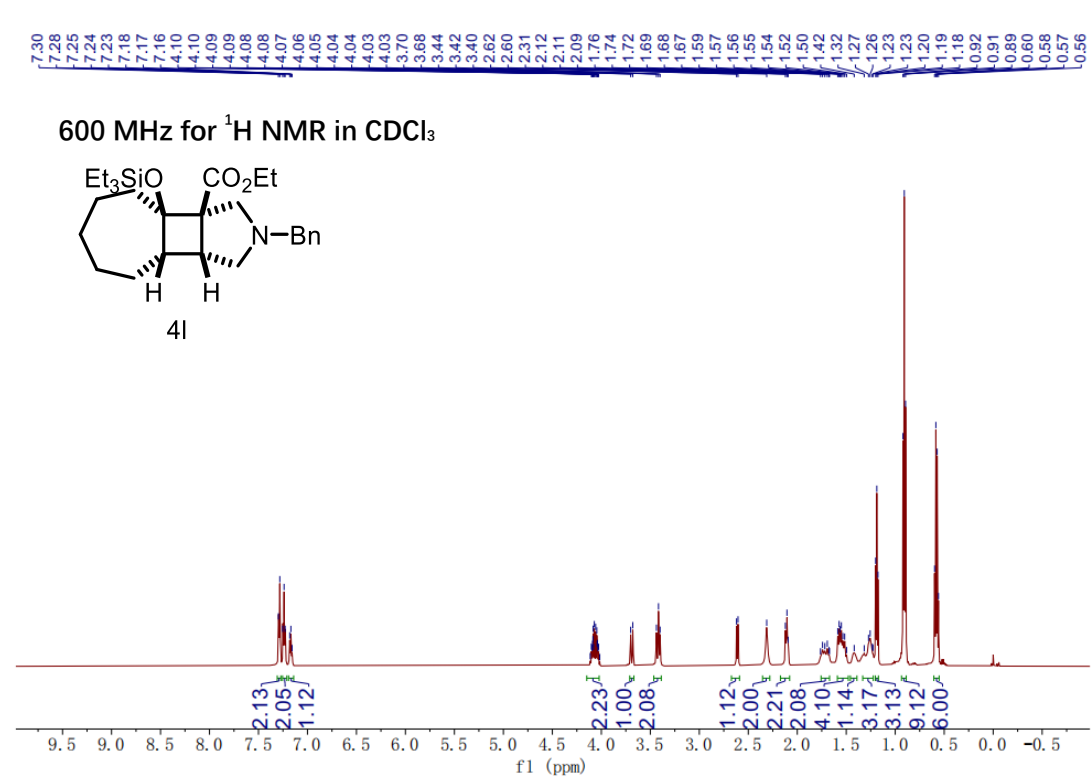

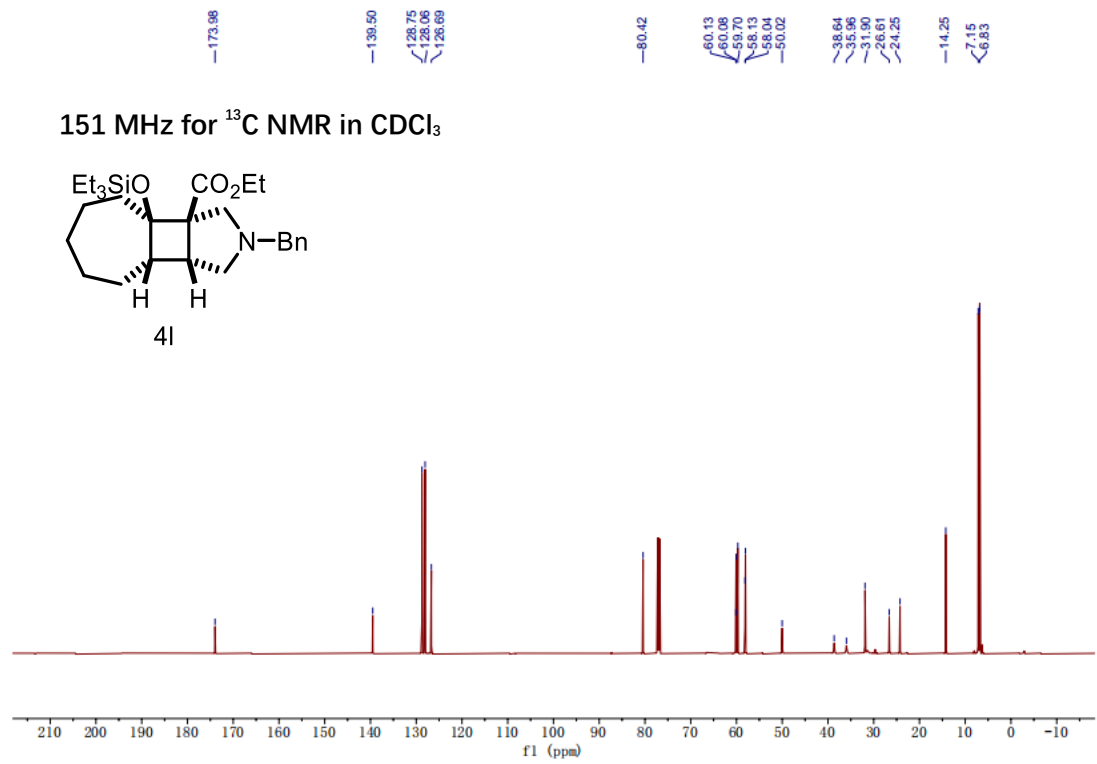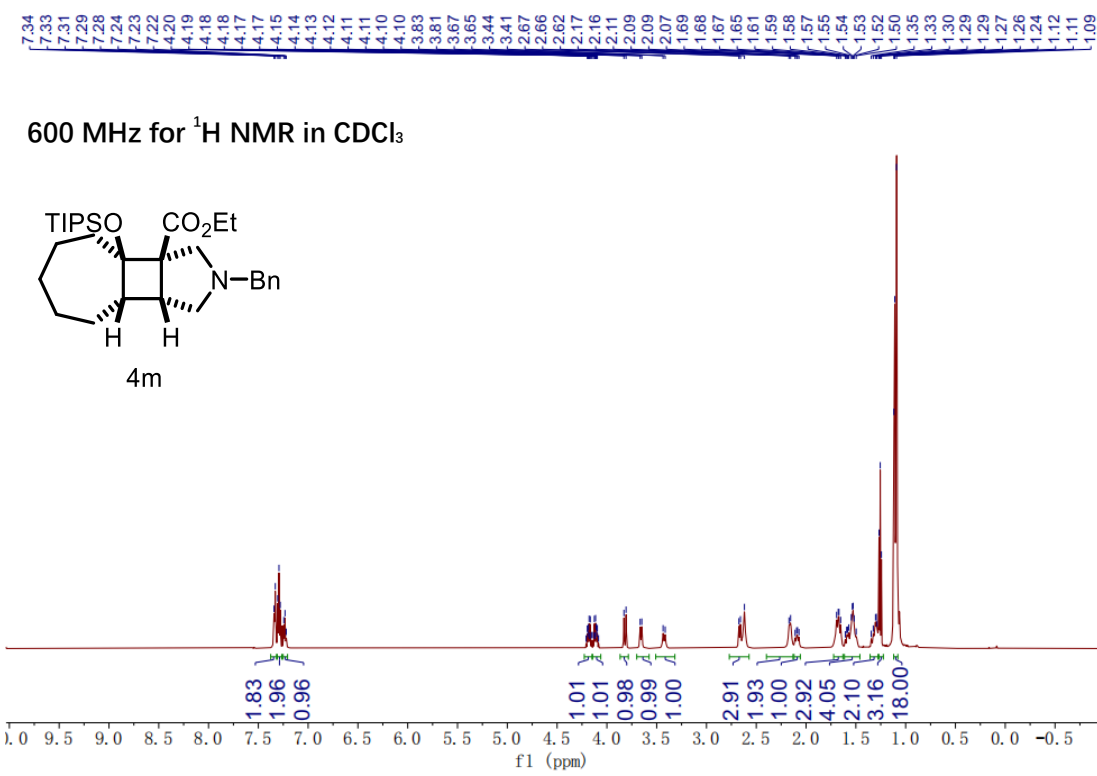

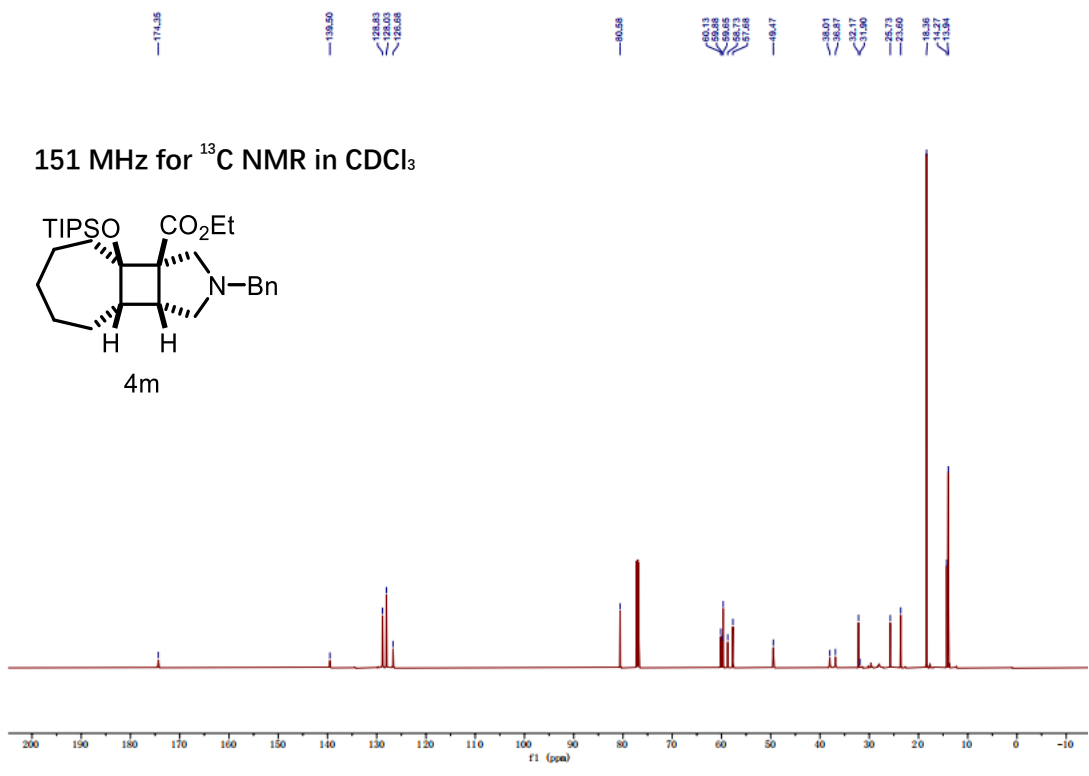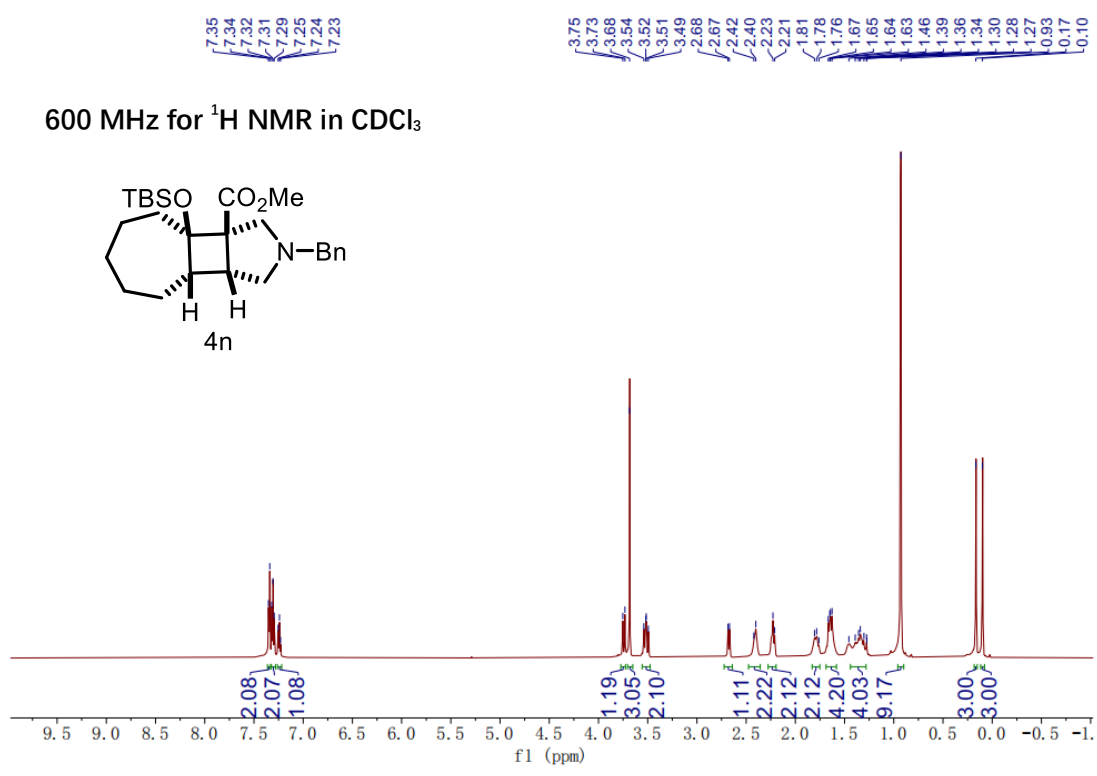



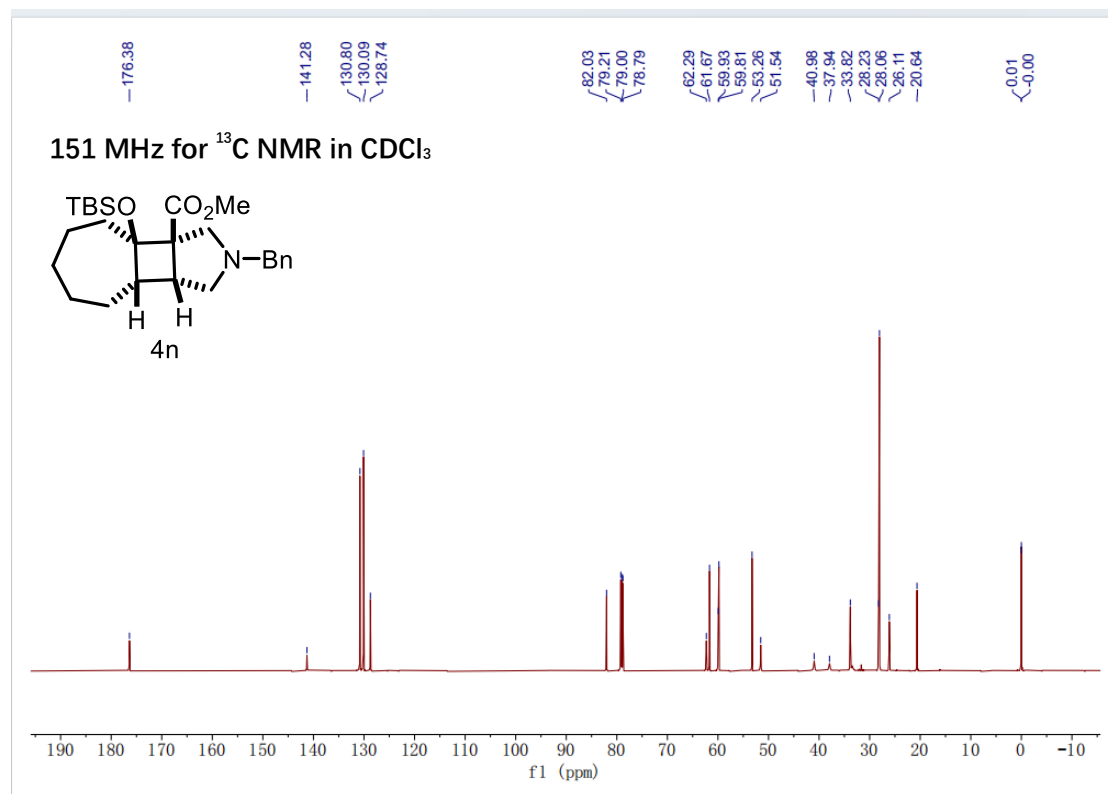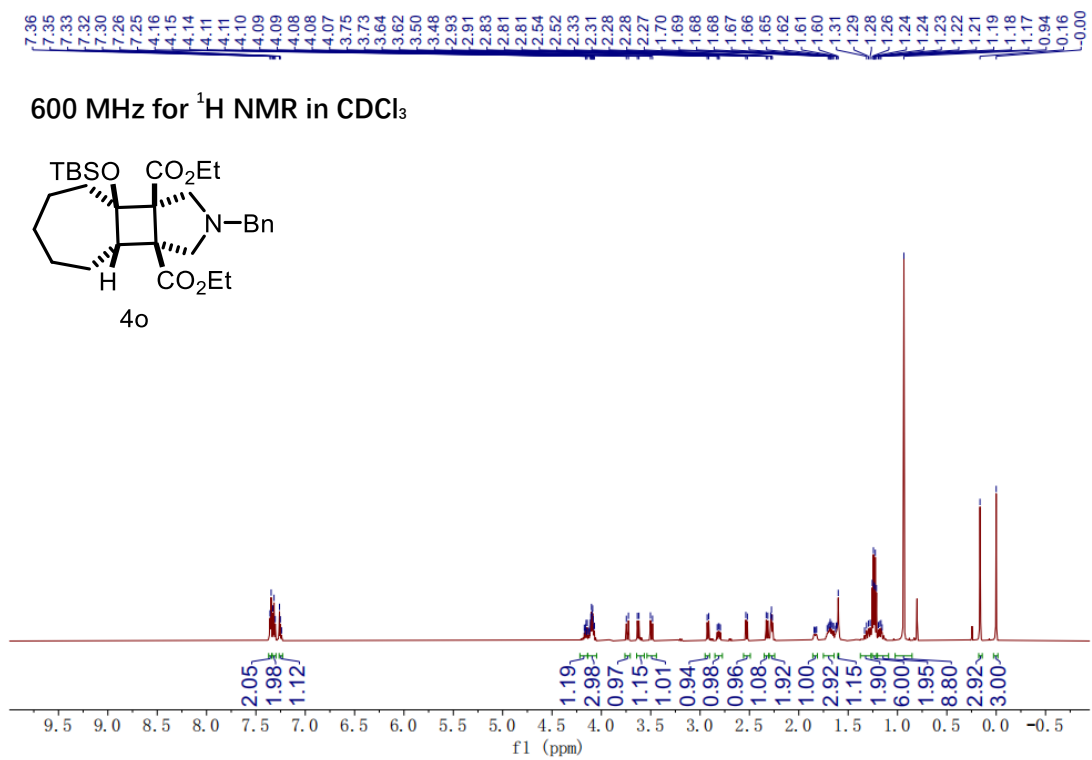

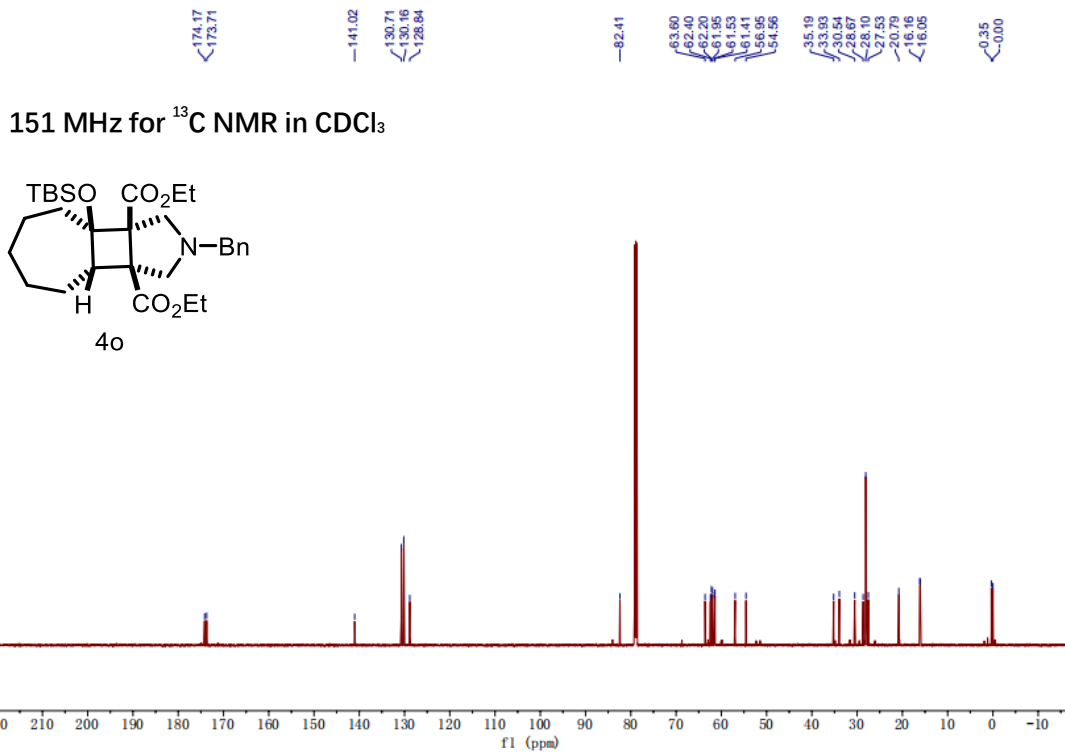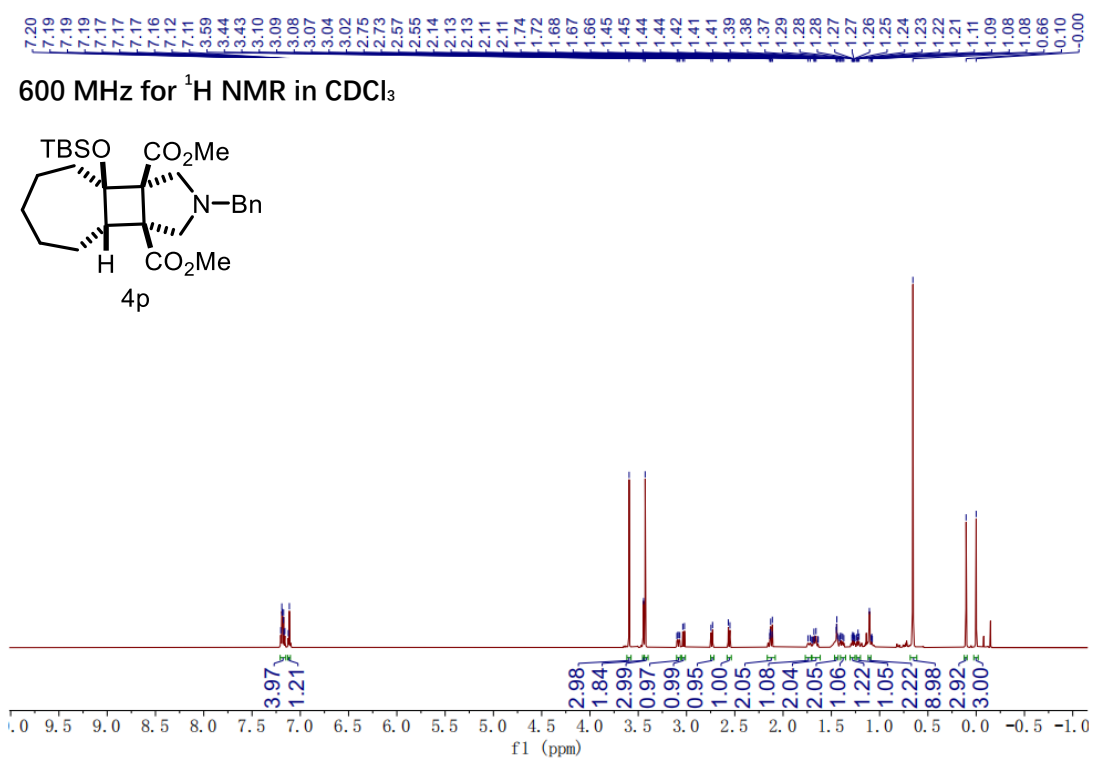

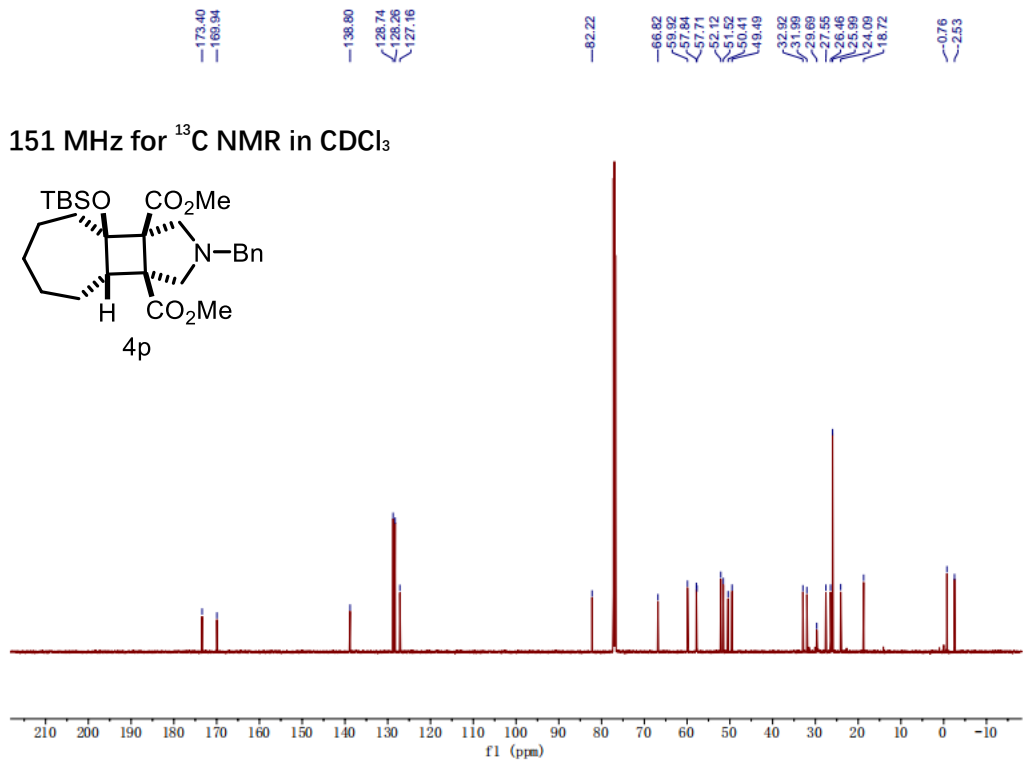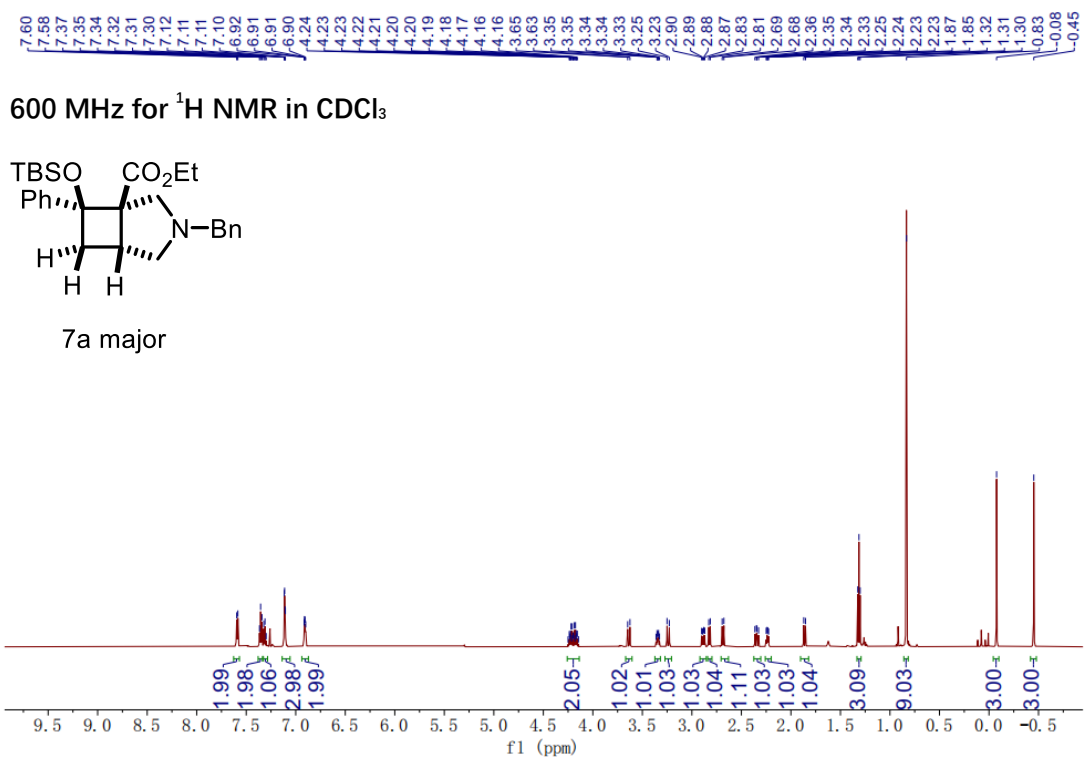

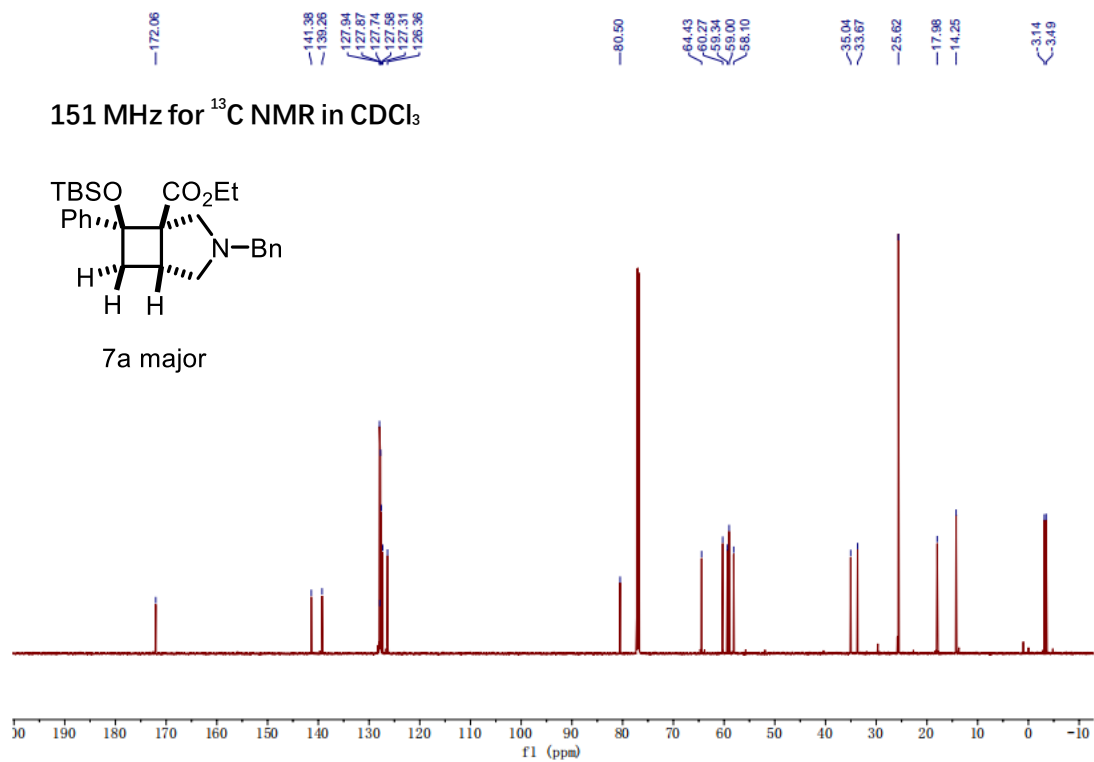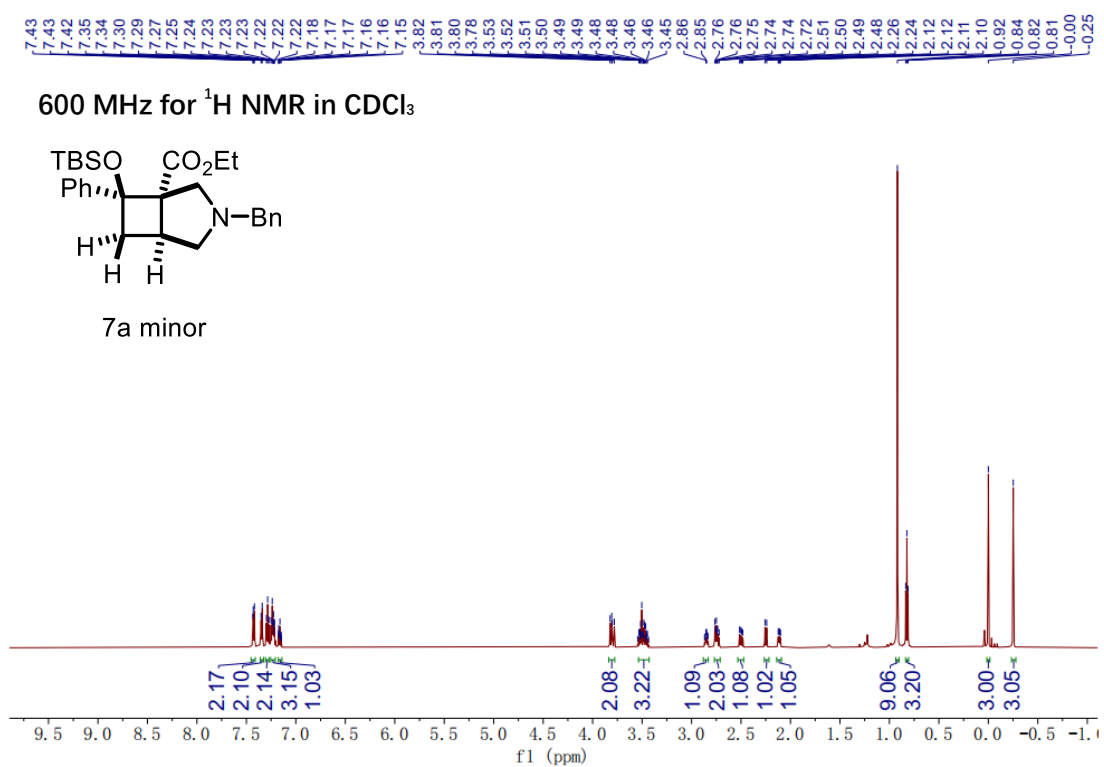

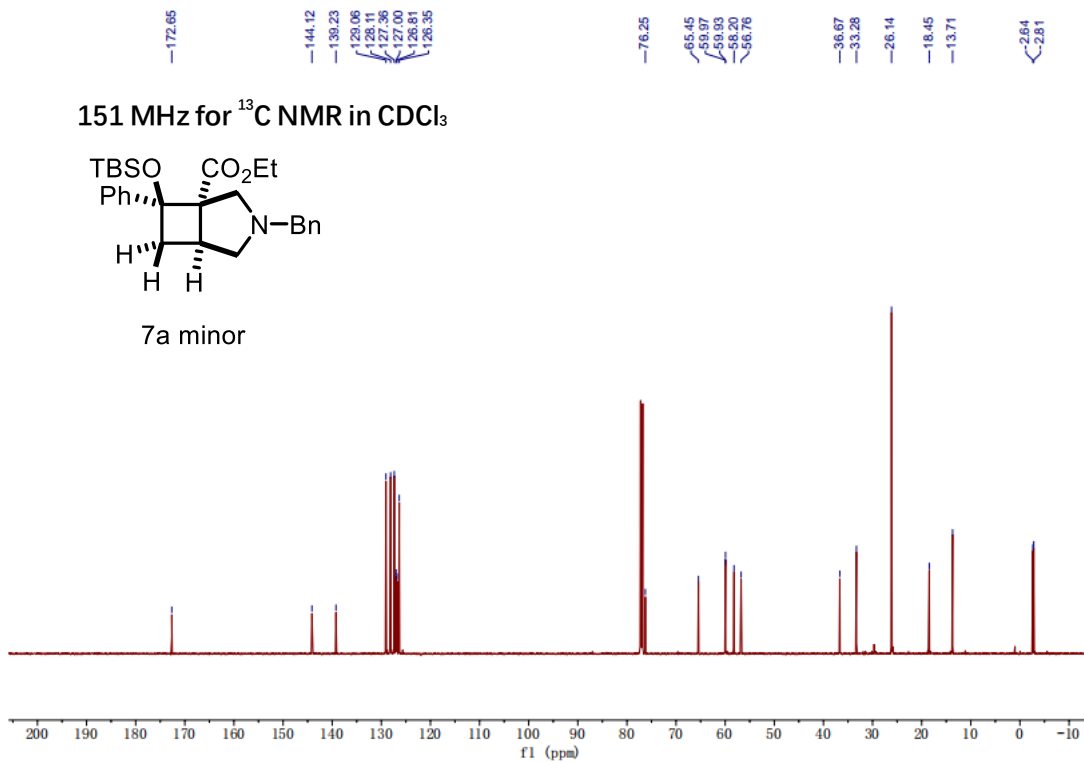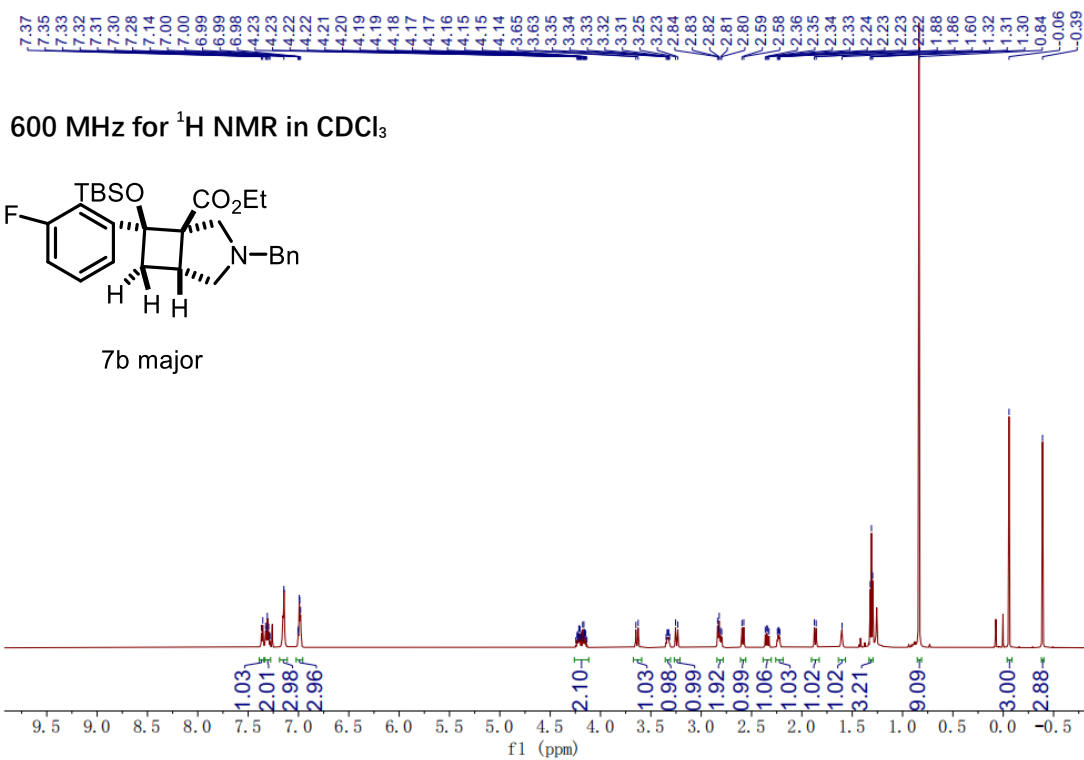

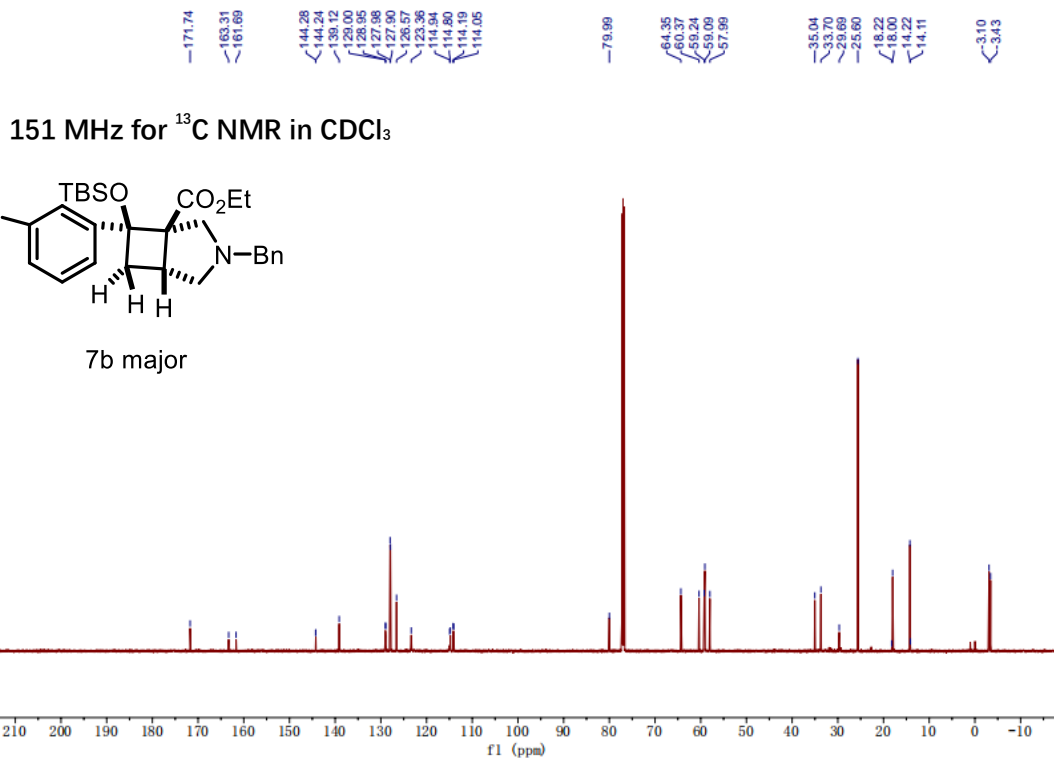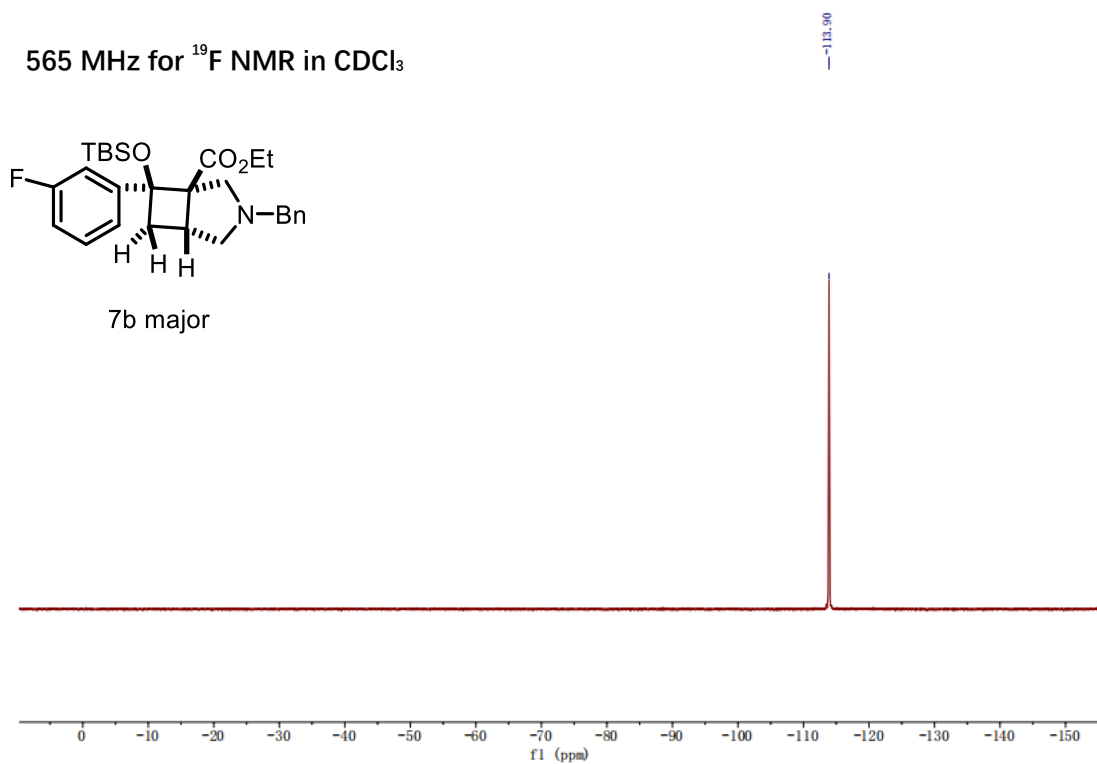

7.38  
7.37  
7.36  
7.34  
7.32  
7.32  
7.30  
7.28  
7.27  
7.27  
7.26  
7.24  
7.24  
7.23  
7.22  
7.21  
7.21  
7.18  
7.18  
7.17  
6.91  
6.91  
6.90  
6.88  
3.83  
3.81  
3.80  
3.61  
3.61  
3.60  
3.59  
3.58  
3.57  
3.56  
3.54  
3.51  
2.89  
2.88  
2.87  
2.80  
2.78  
2.73  
2.71  
2.70  
2.68  
2.58  
2.56  
2.55  
2.55  
2.25  
2.25  
2.16  
2.15  
2.14  
2.13  
0.95  
0.92  
0.88  
0.88  
-0.06  
-0.20

400 MHz for  $^1\text{H}$  NMR in  $\text{CDCl}_3$

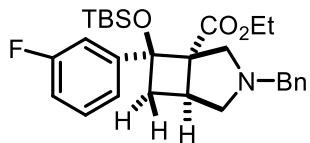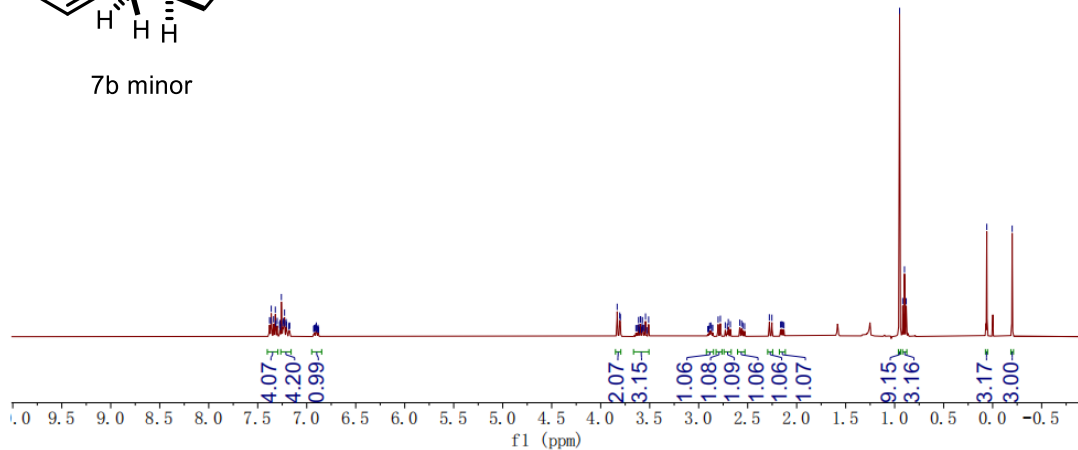

172.38  
163.22  
161.60  
147.28  
139.10  
130.08  
128.93  
128.88  
128.14  
126.88  
121.73  
113.91  
113.76  
-75.97  
65.34  
60.99  
59.91  
58.14  
56.73  
36.74  
33.31  
29.69  
26.10  
18.43  
13.68  
2.58  
2.86

151 MHz for  $^{13}\text{C}$  NMR in  $\text{CDCl}_3$

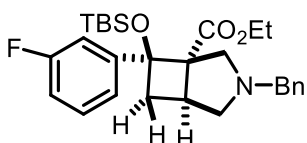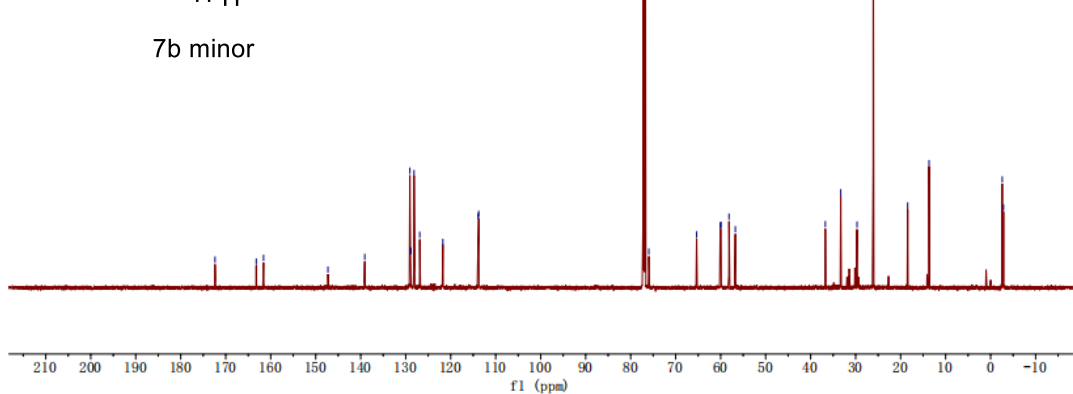

565 MHz for  $^{19}\text{F}$  NMR in  $\text{CDCl}_3$

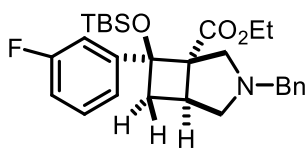

7b minor

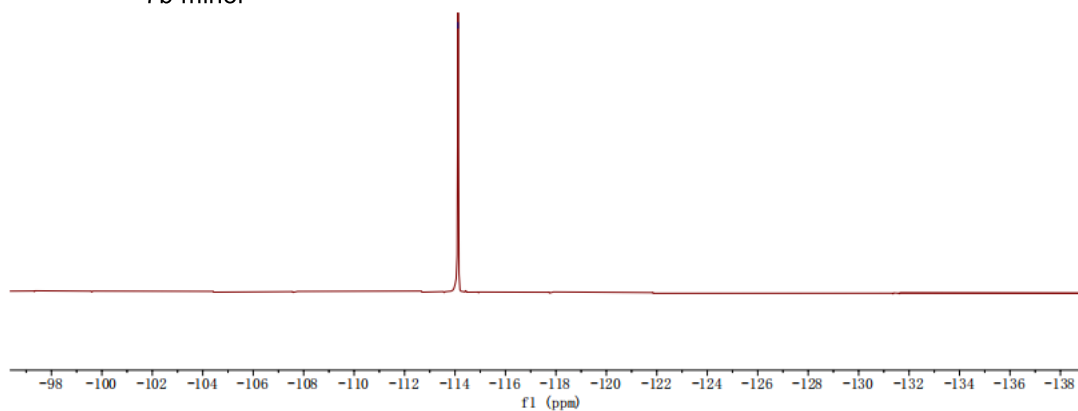

7.56  
7.55  
7.54  
7.15  
7.14  
7.14  
7.05  
7.03  
7.02  
6.93  
6.93  
6.92  
4.24  
4.22  
4.22  
4.21  
4.21  
4.19  
4.18  
4.17  
4.16  
4.16  
4.15  
4.14  
3.65  
3.63  
3.35  
3.34  
3.33  
3.32  
3.31  
3.24  
3.21  
2.84  
2.83  
2.81  
2.80  
2.61  
2.59  
2.37  
2.36  
2.35  
2.33  
2.25  
2.24  
2.23  
2.22  
1.86  
1.84  
1.31  
1.29  
0.63  
-0.07

600 MHz for  $^1\text{H}$  NMR in  $\text{CDCl}_3$

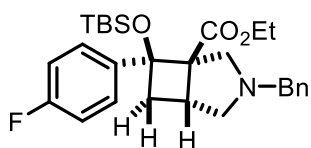

7c major

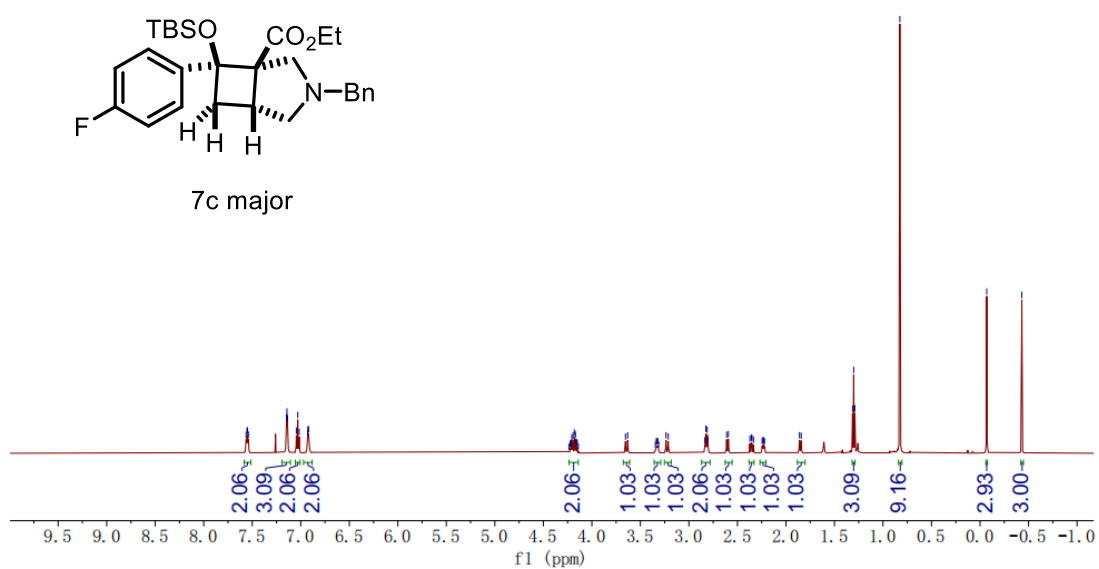



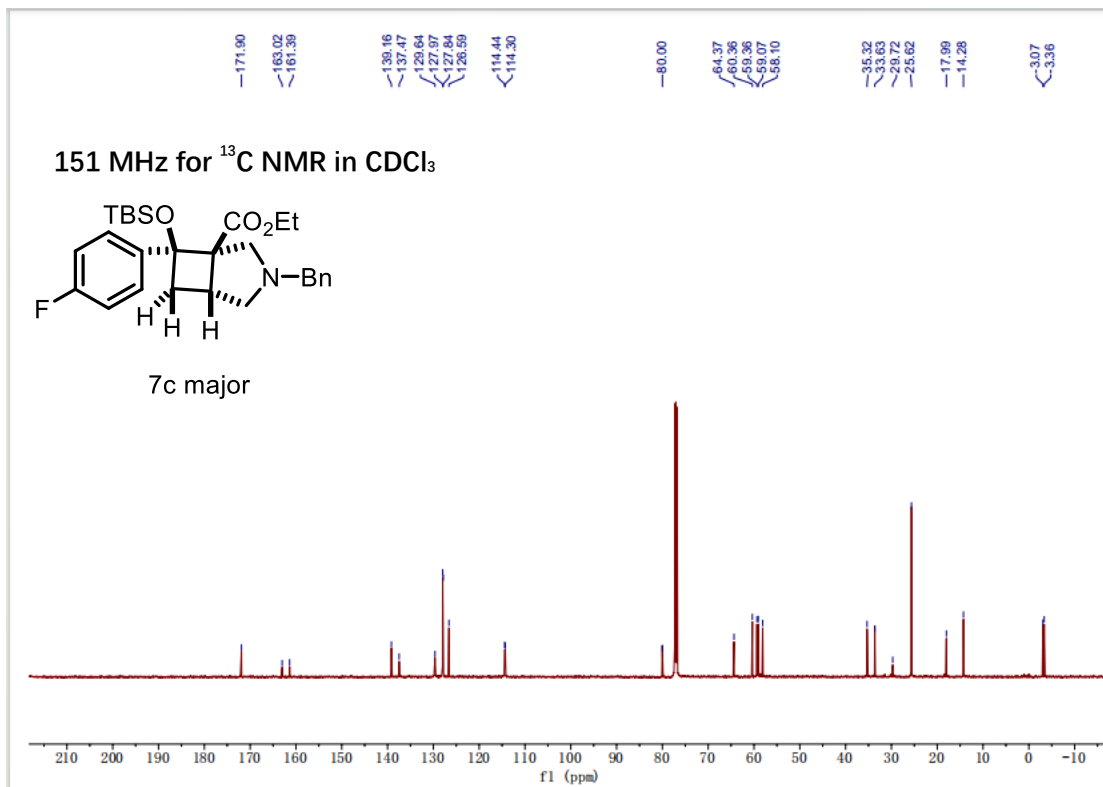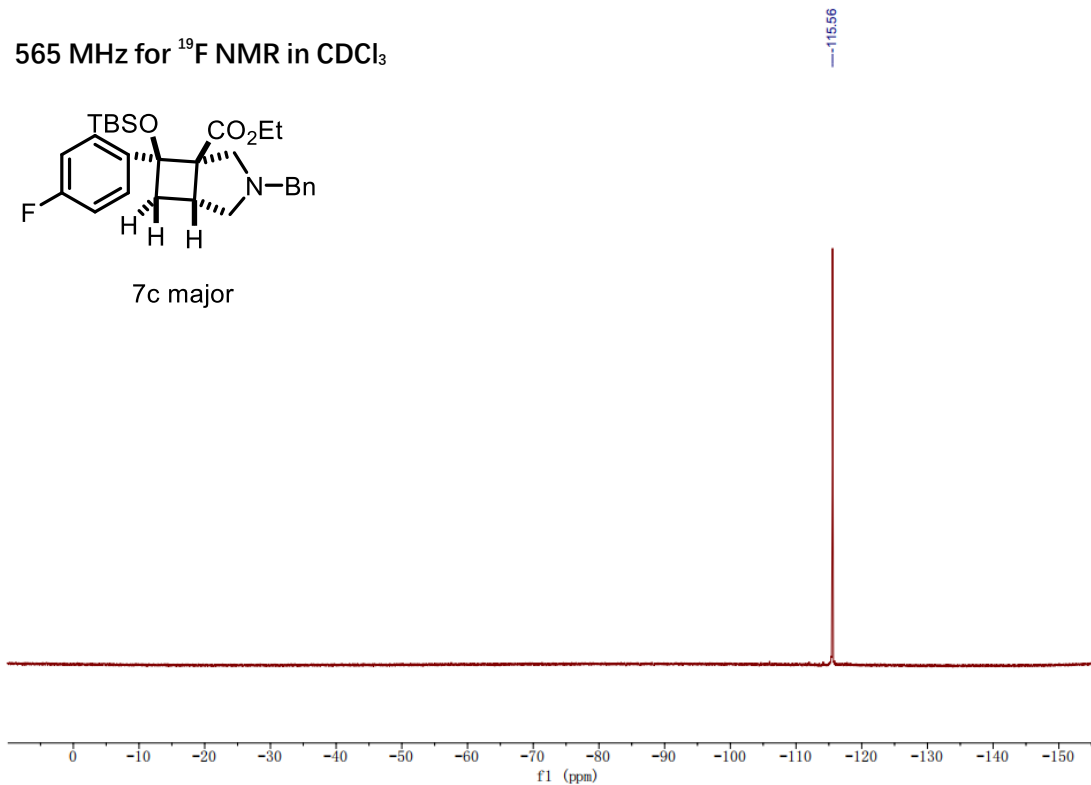

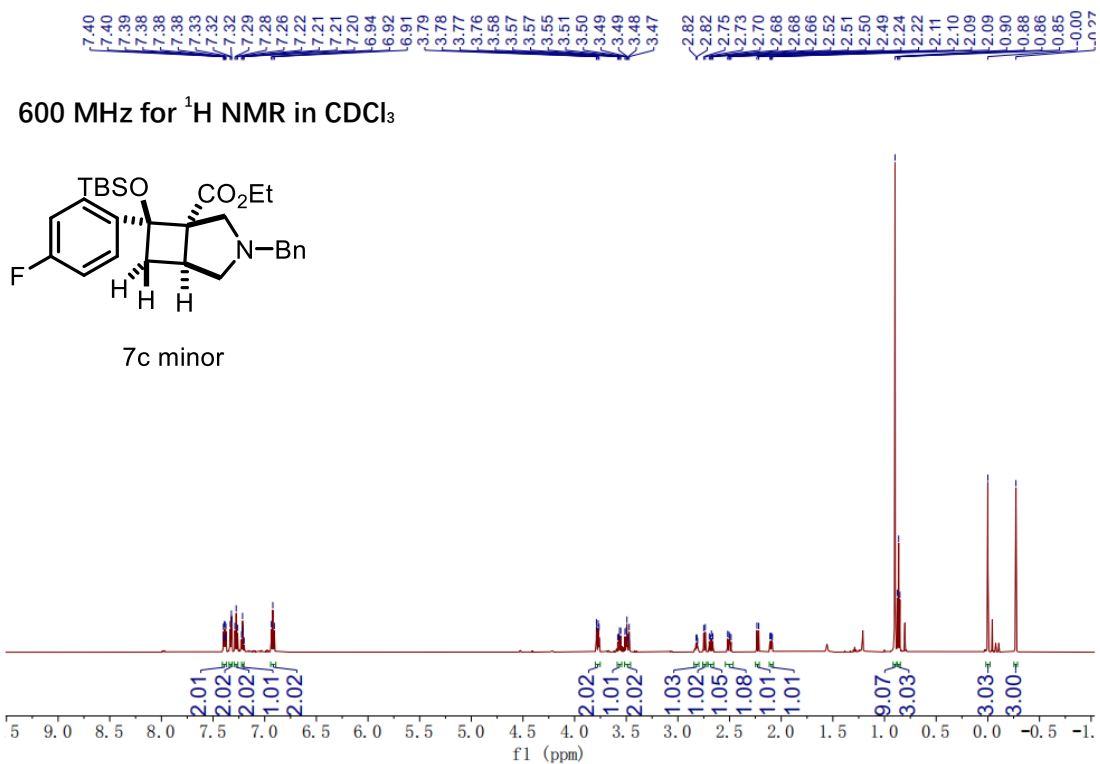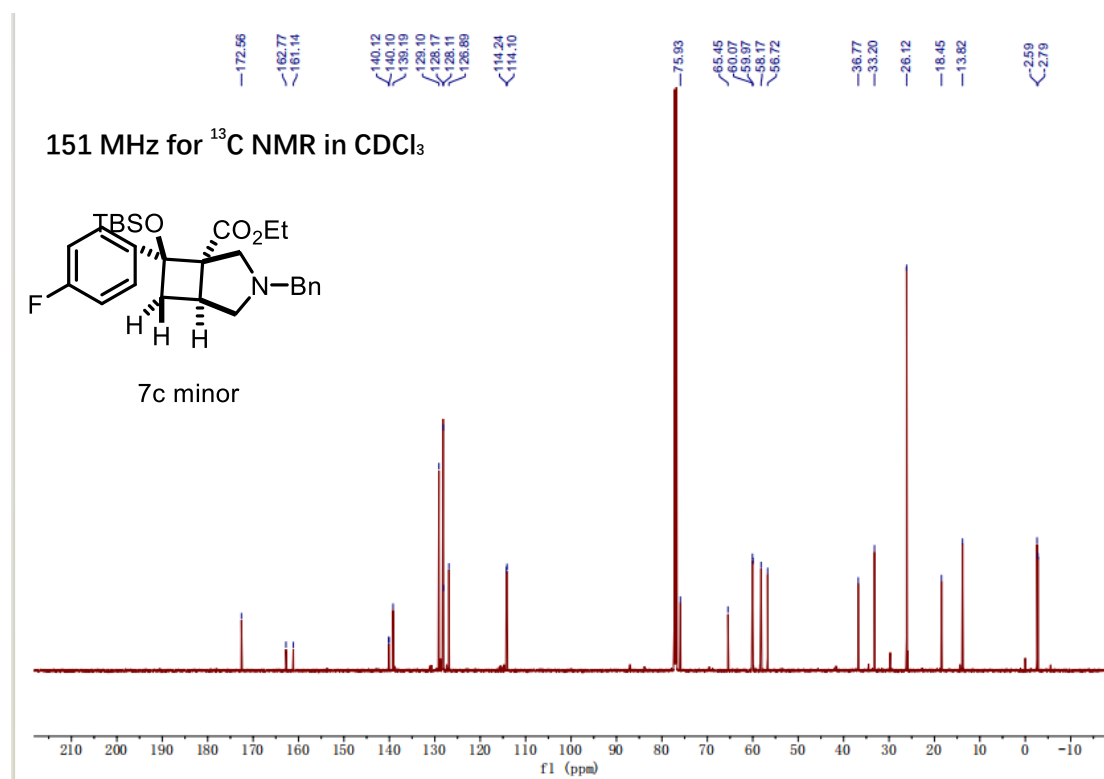

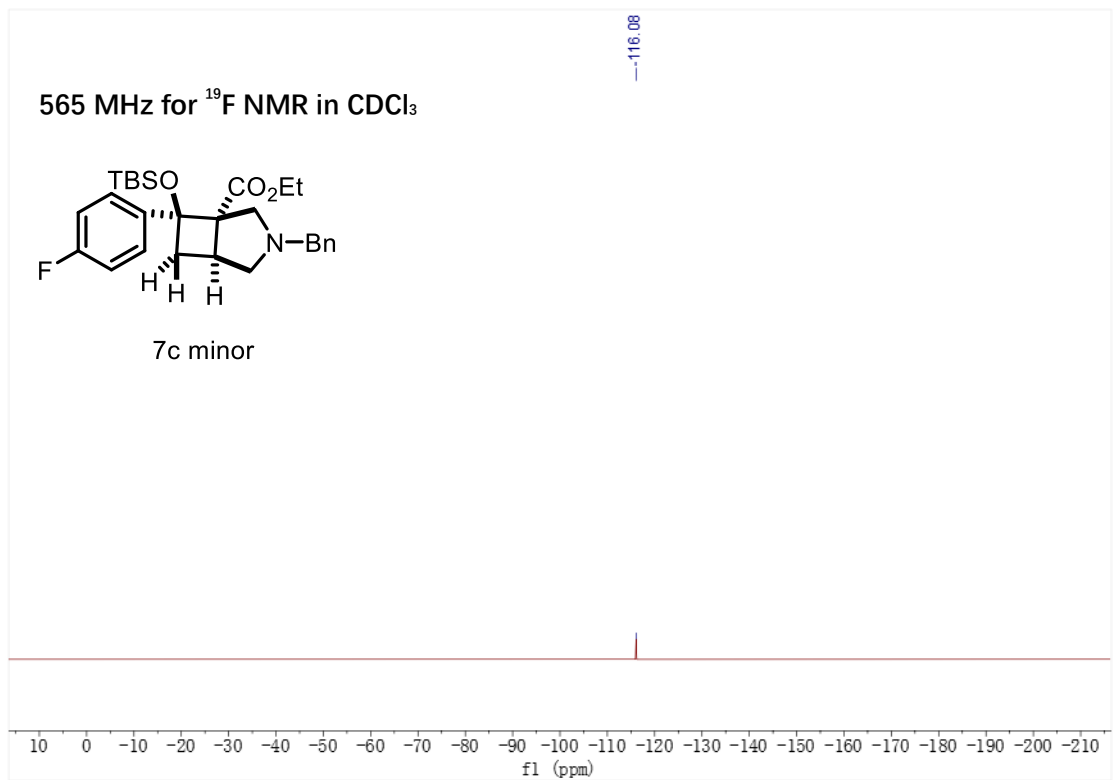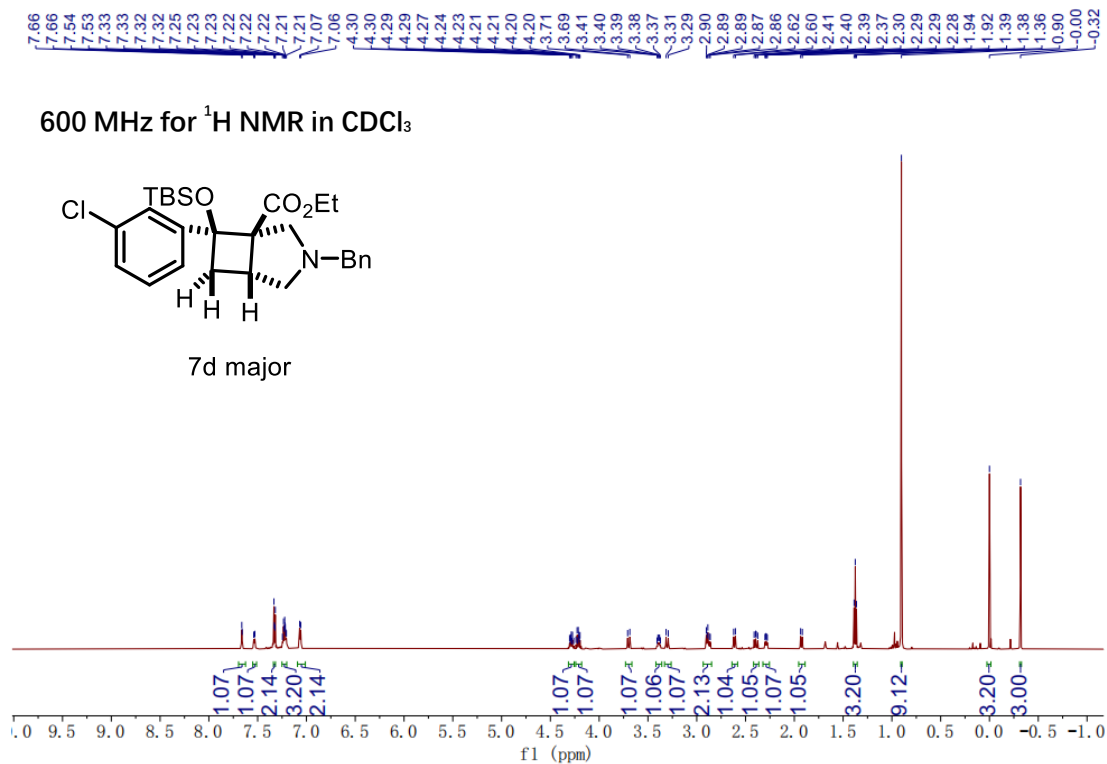

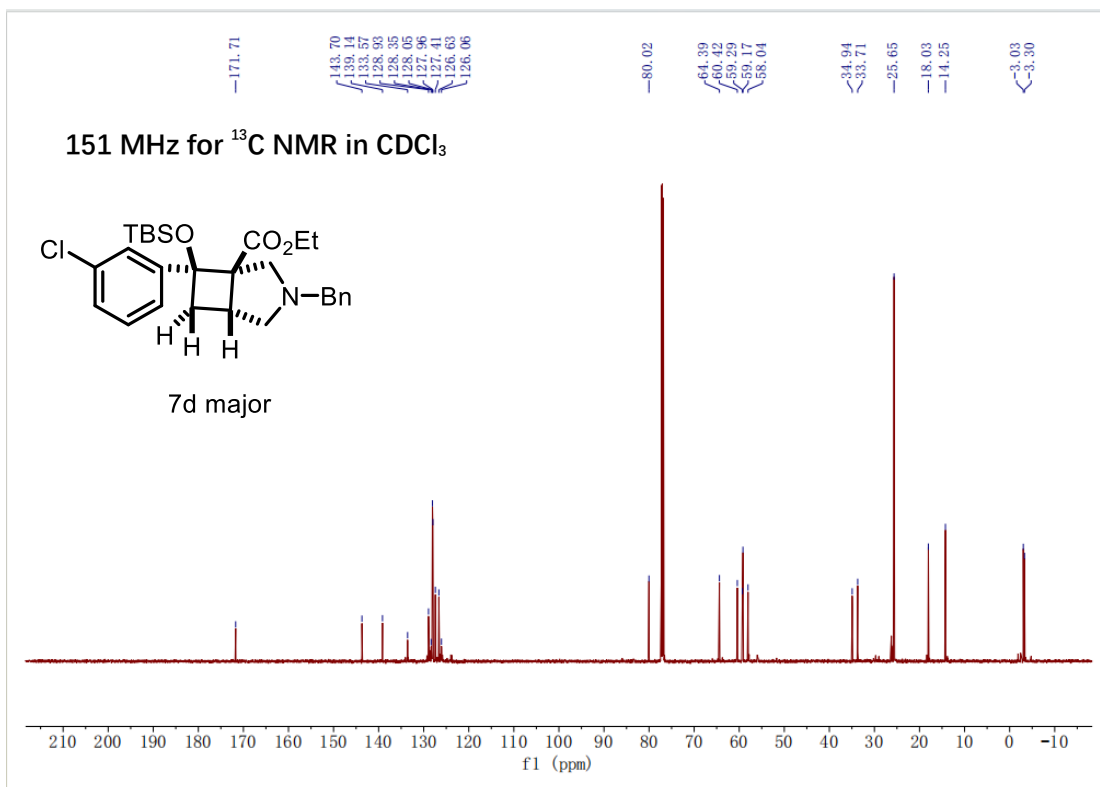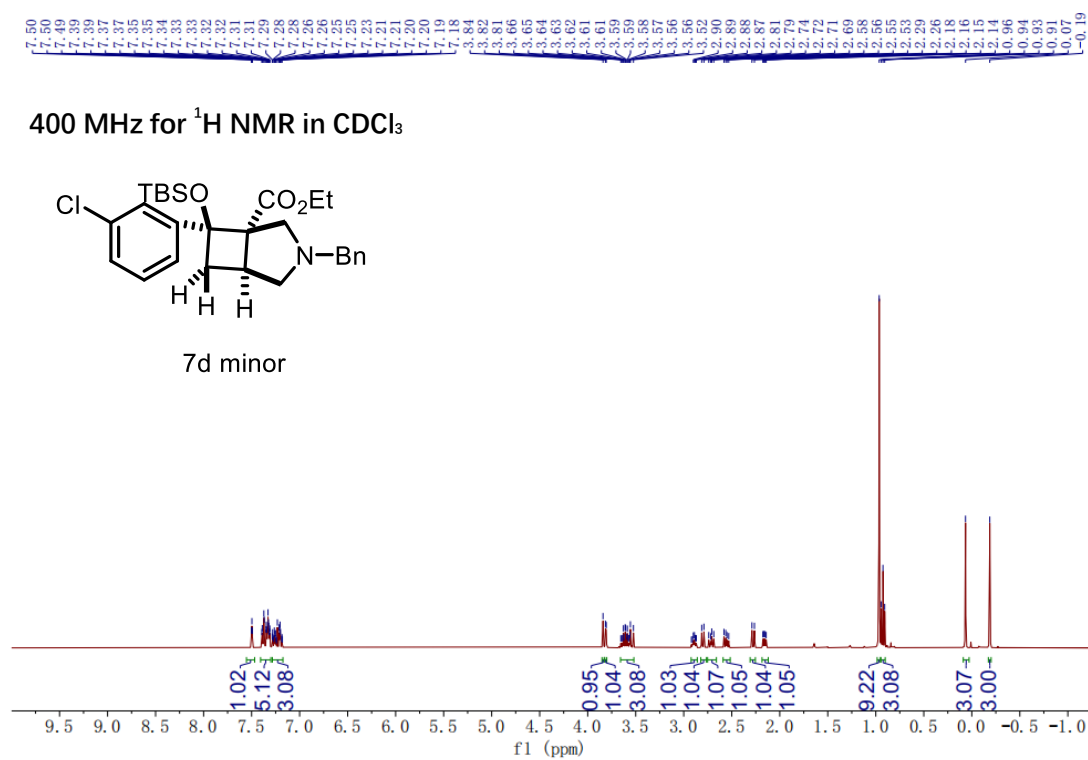

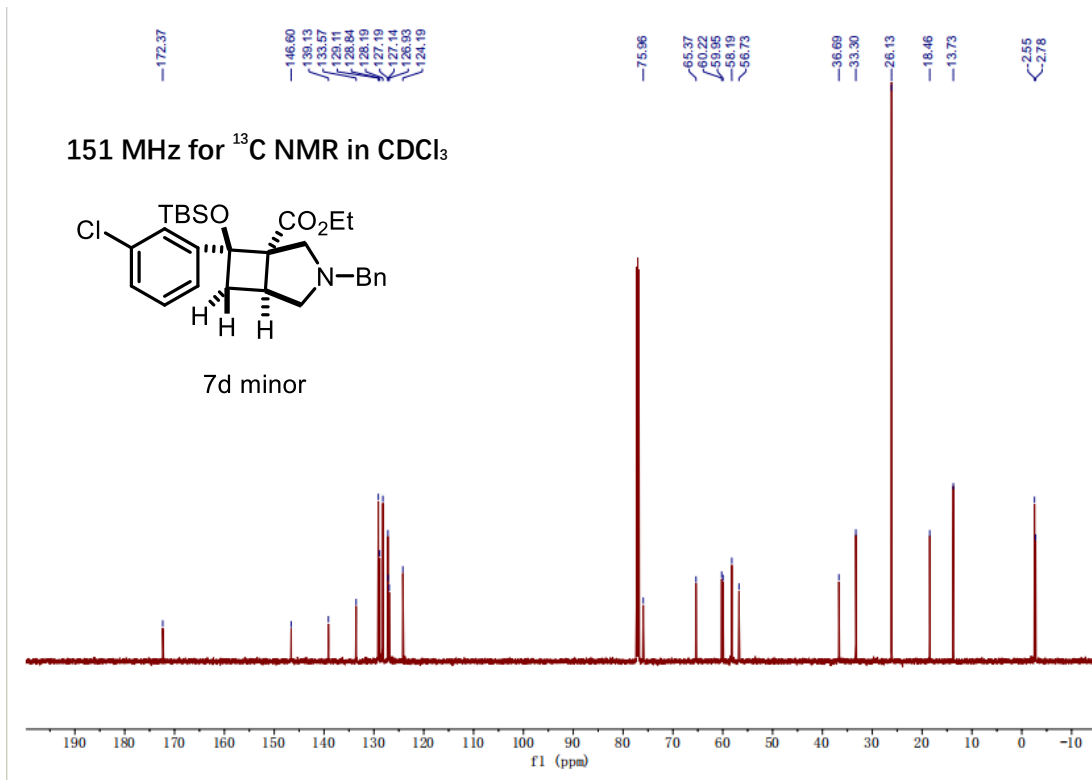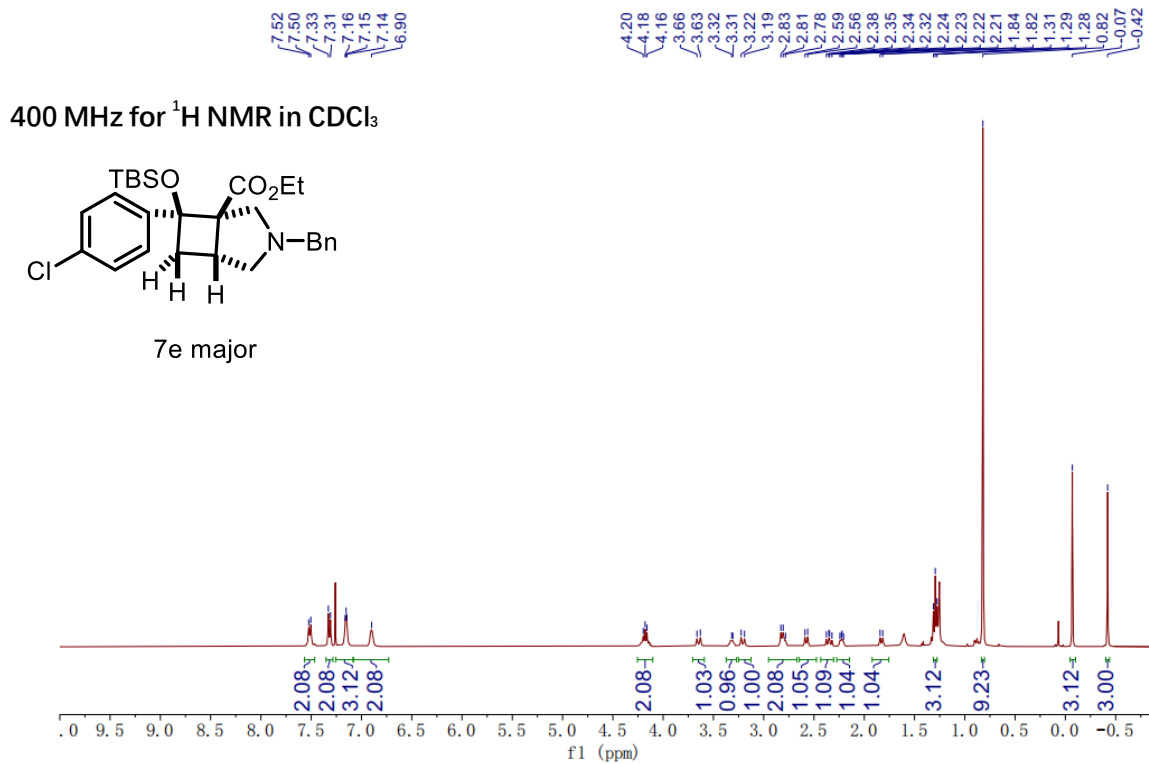

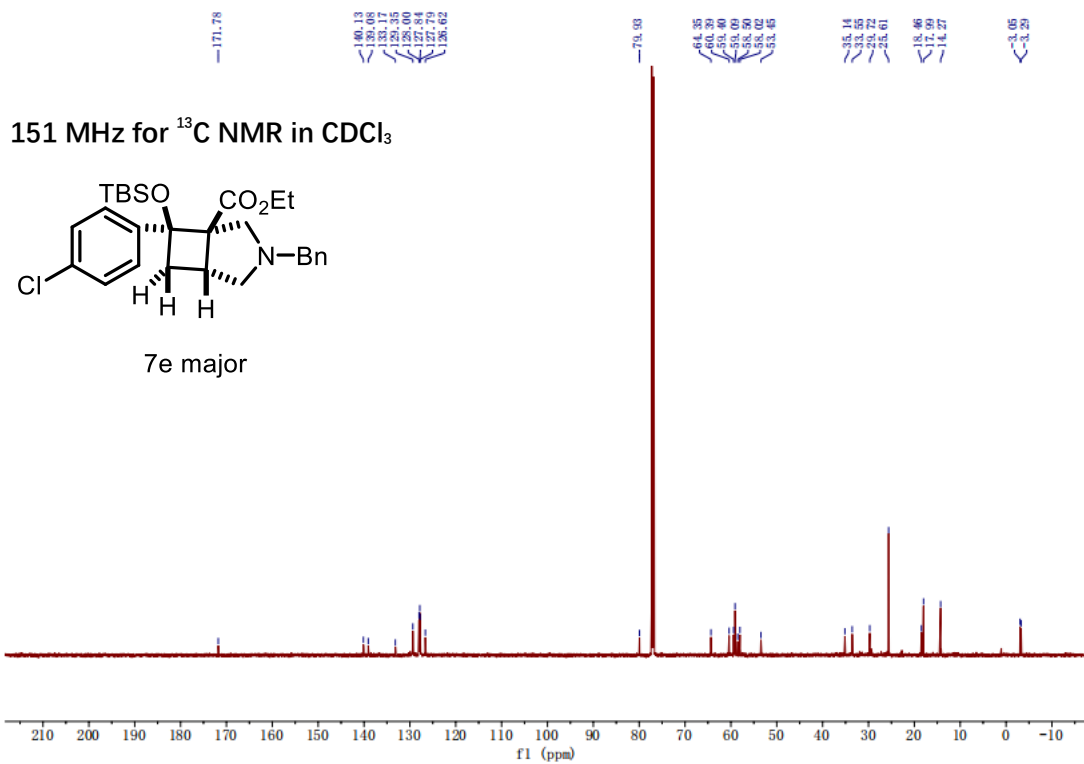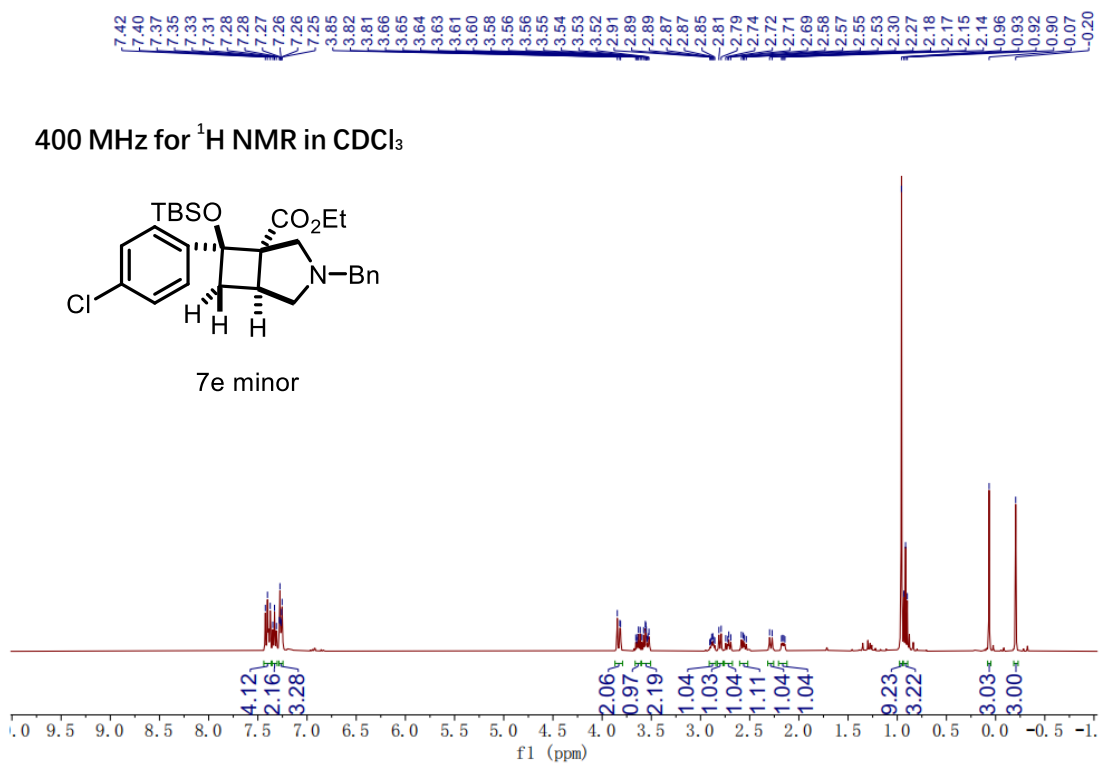

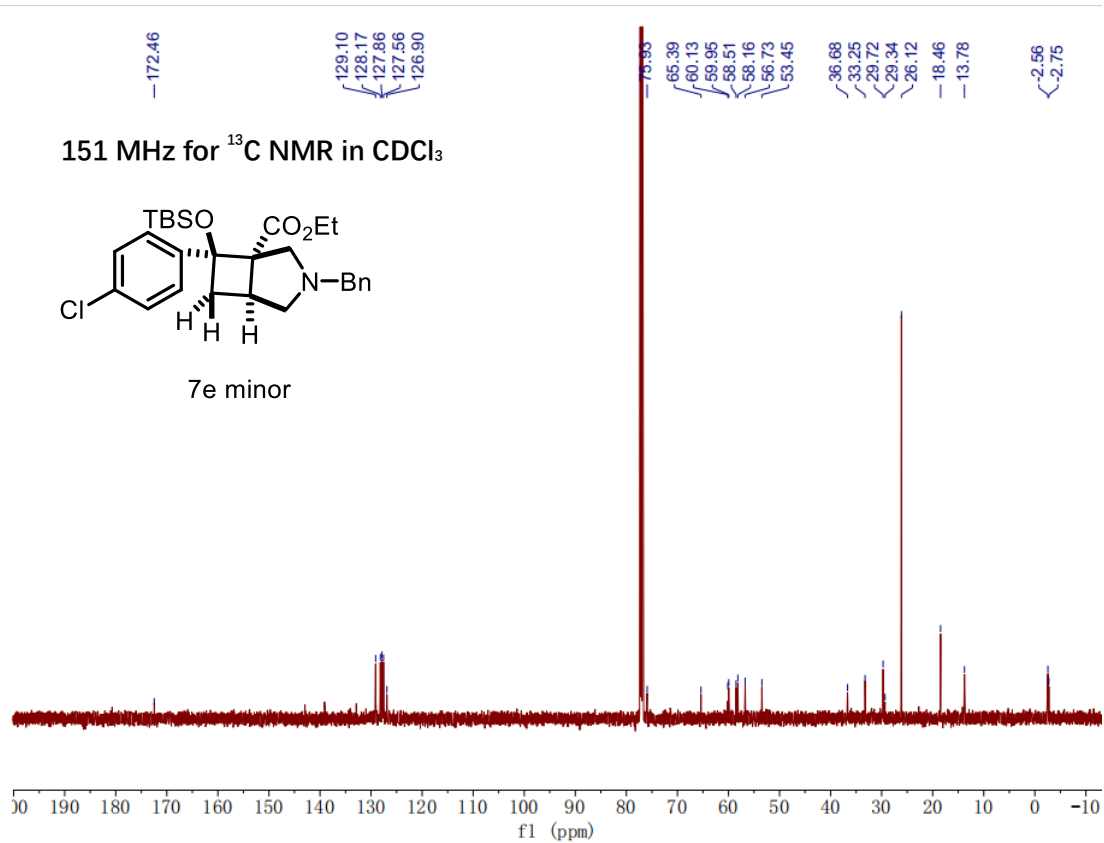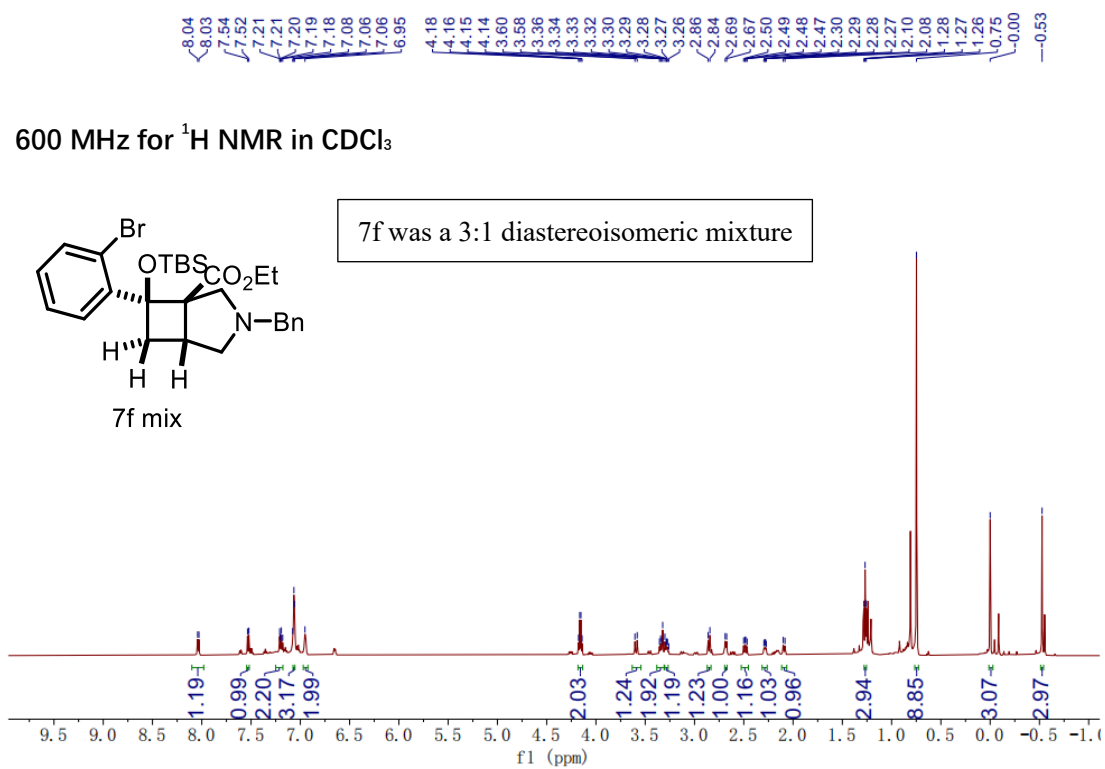

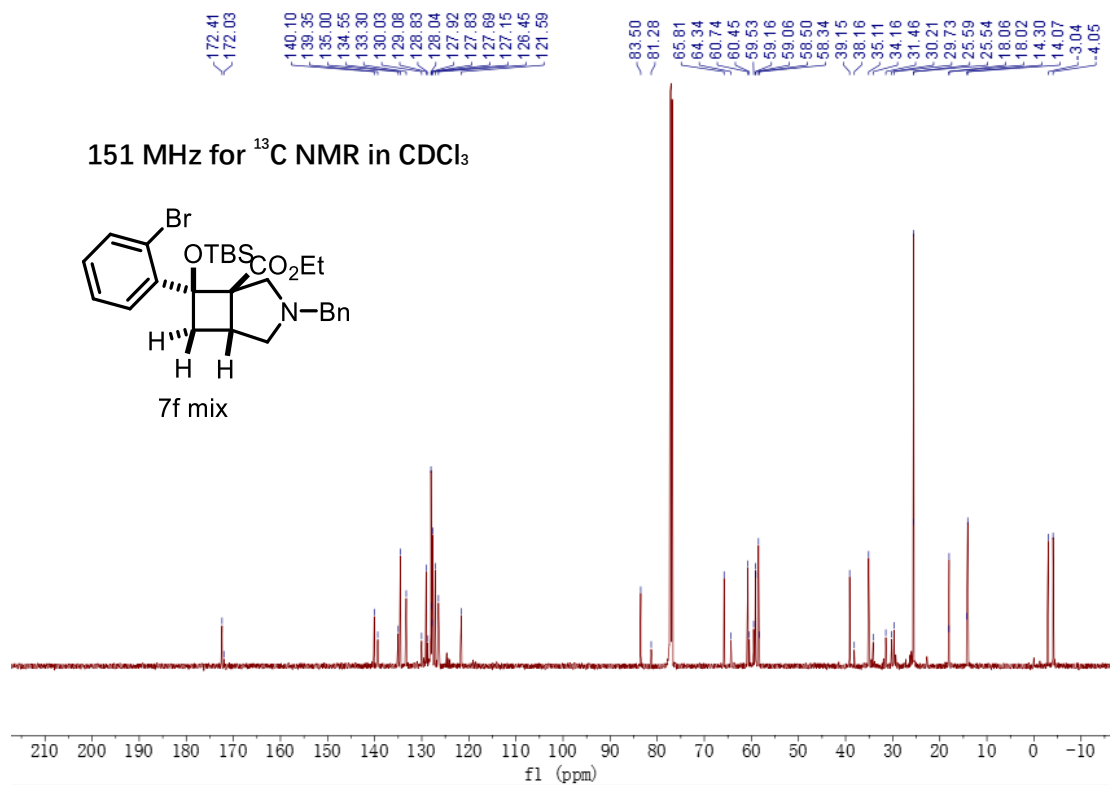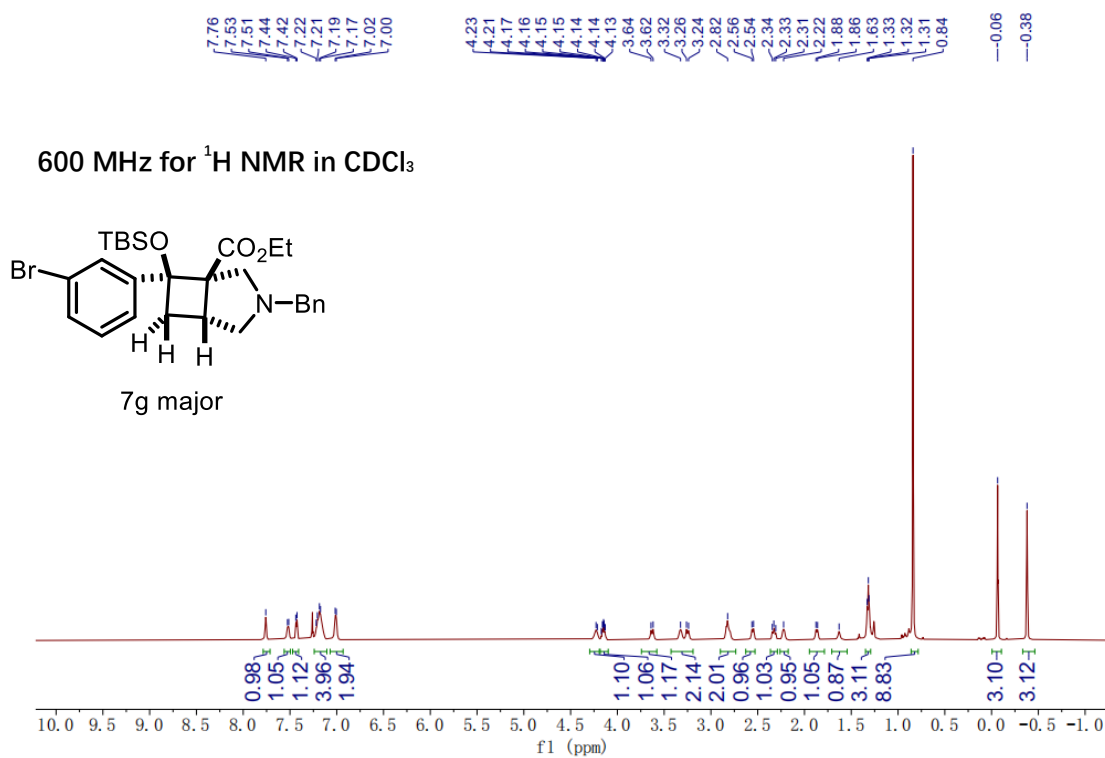



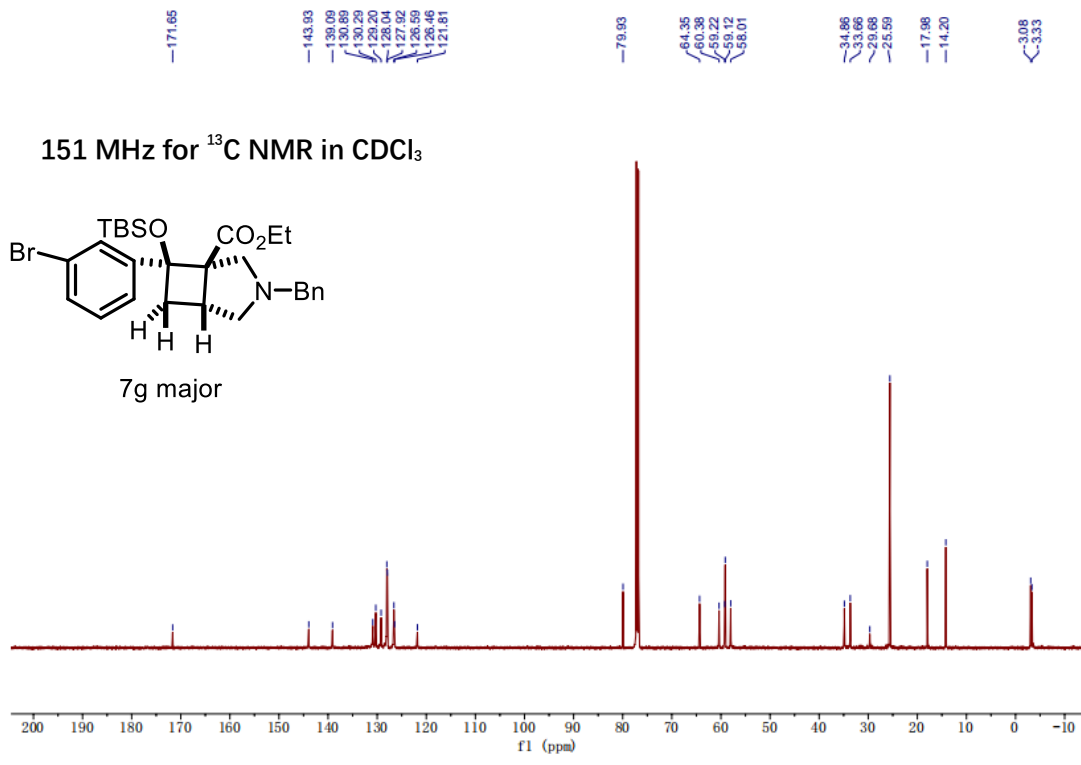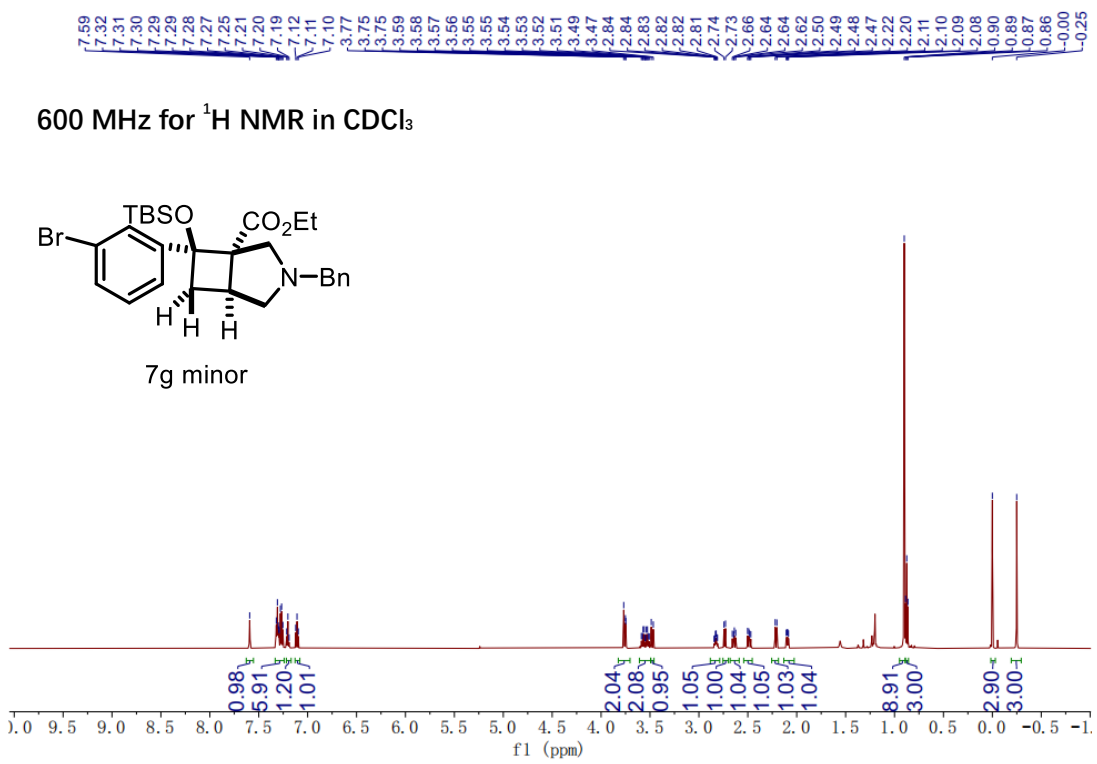

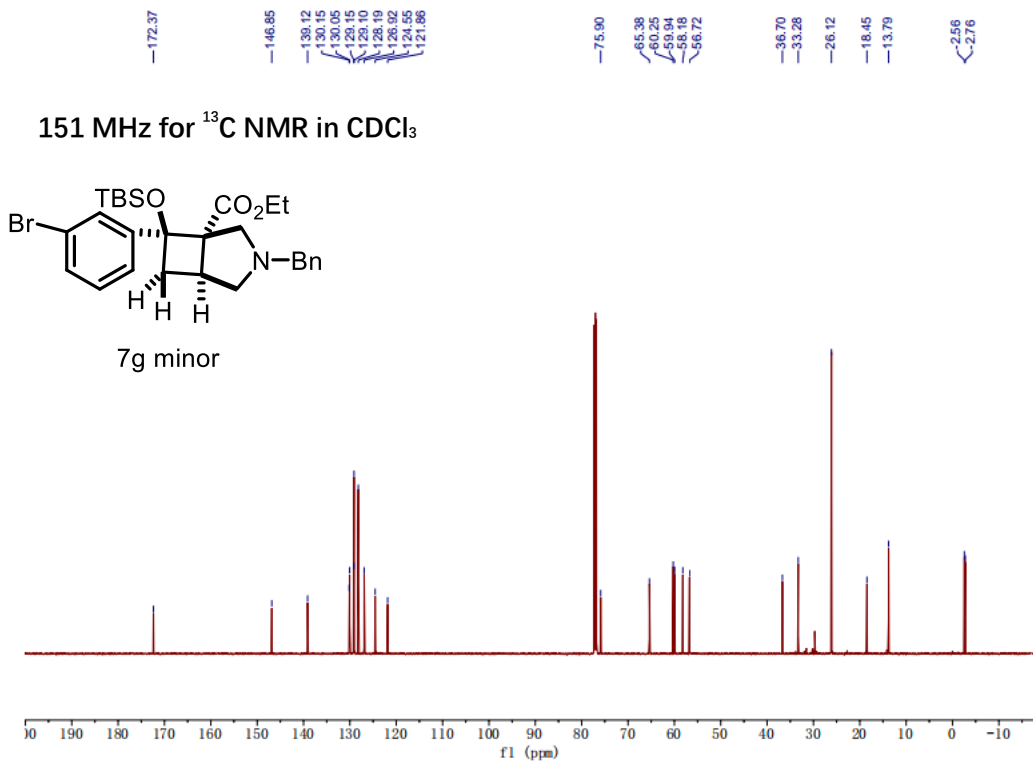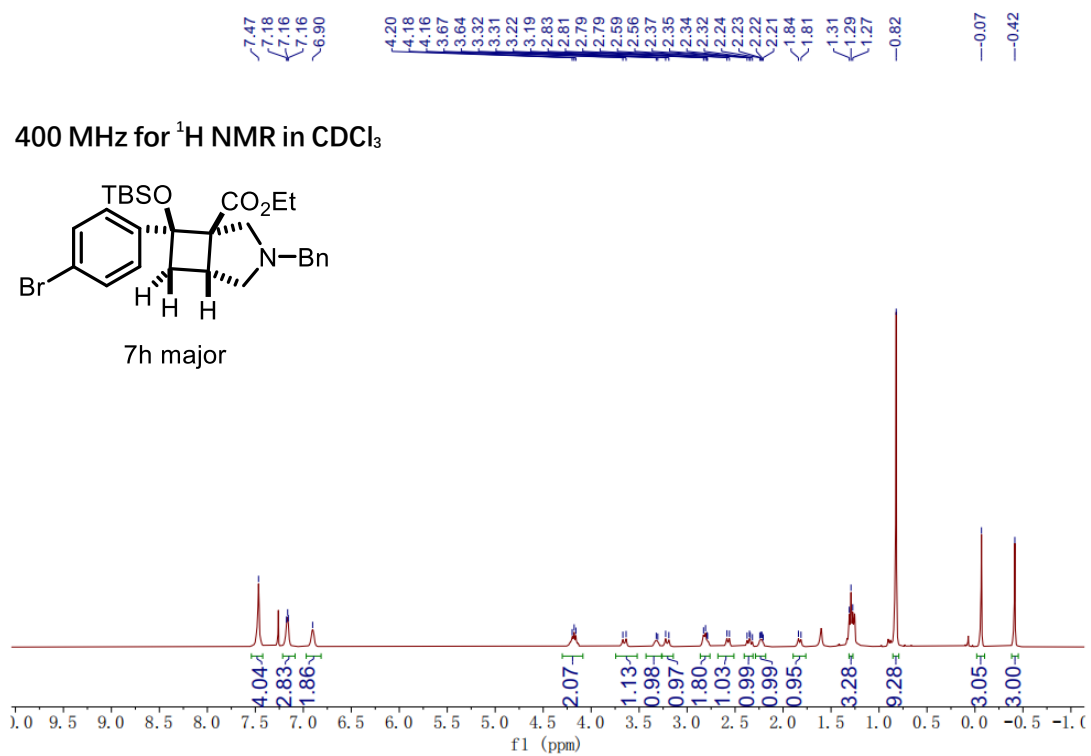

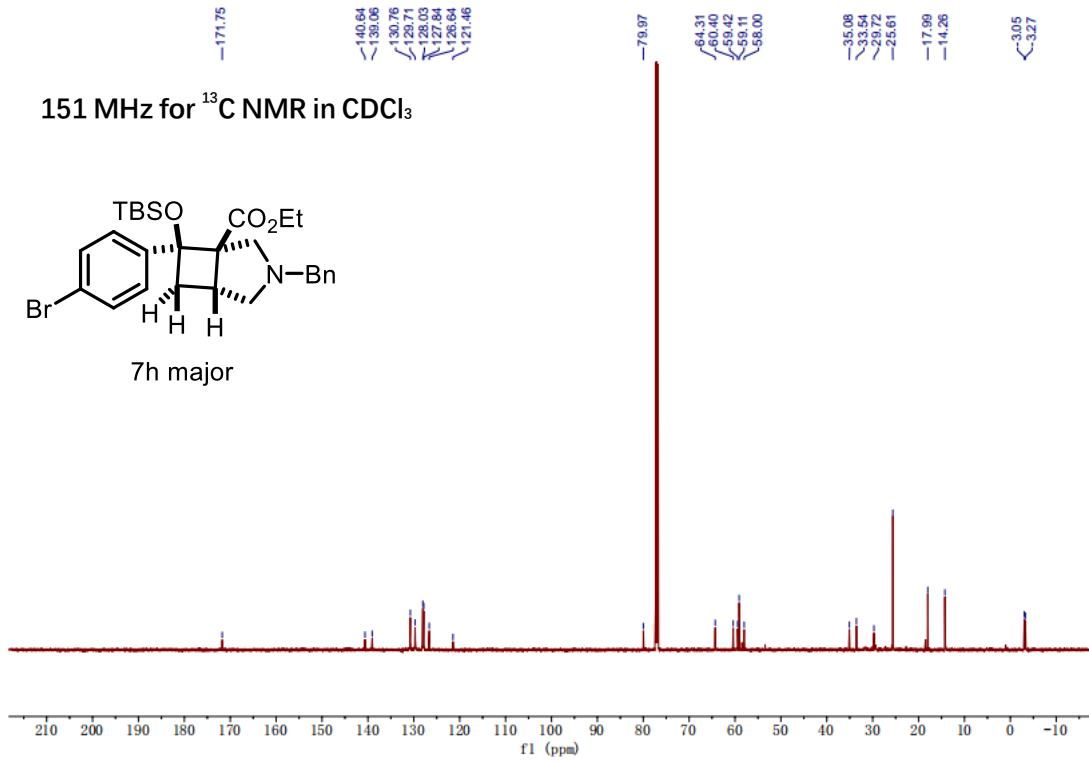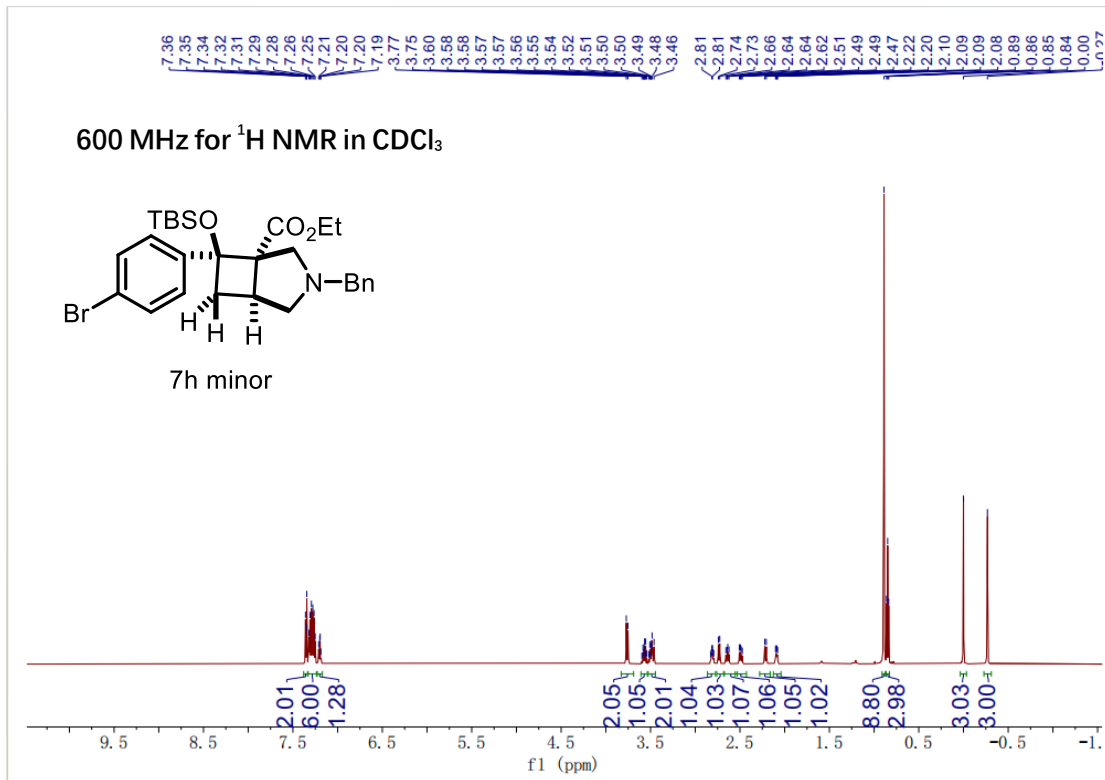

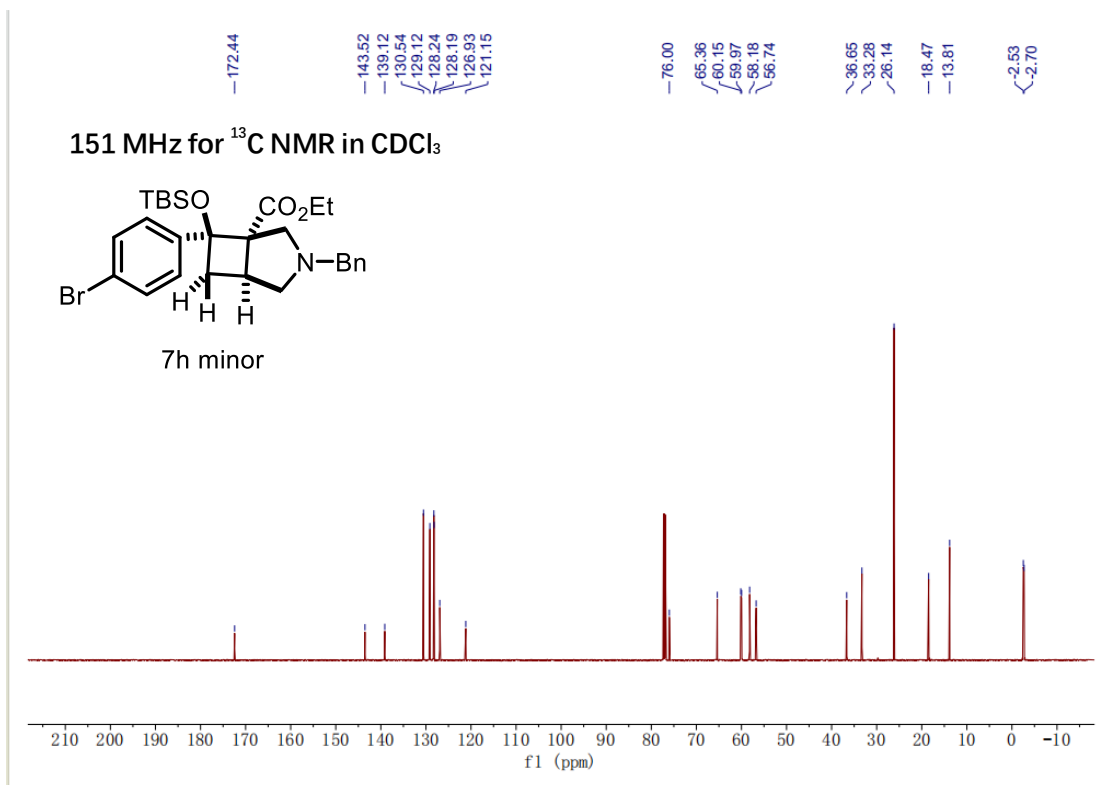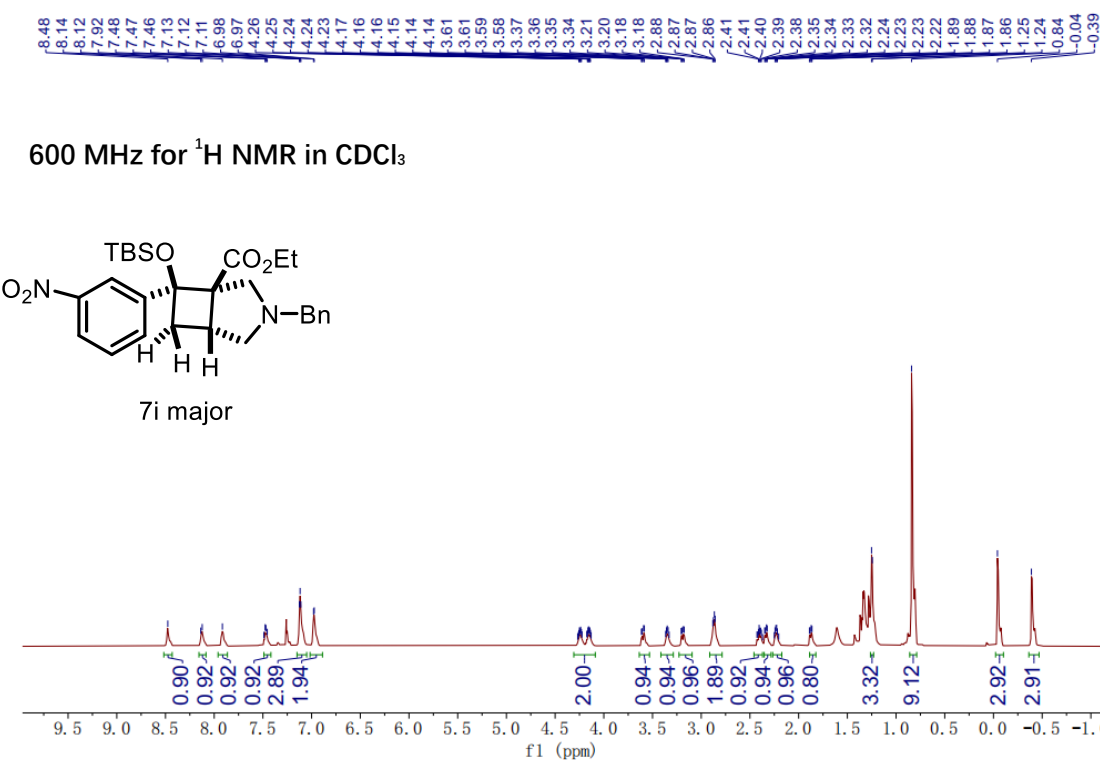

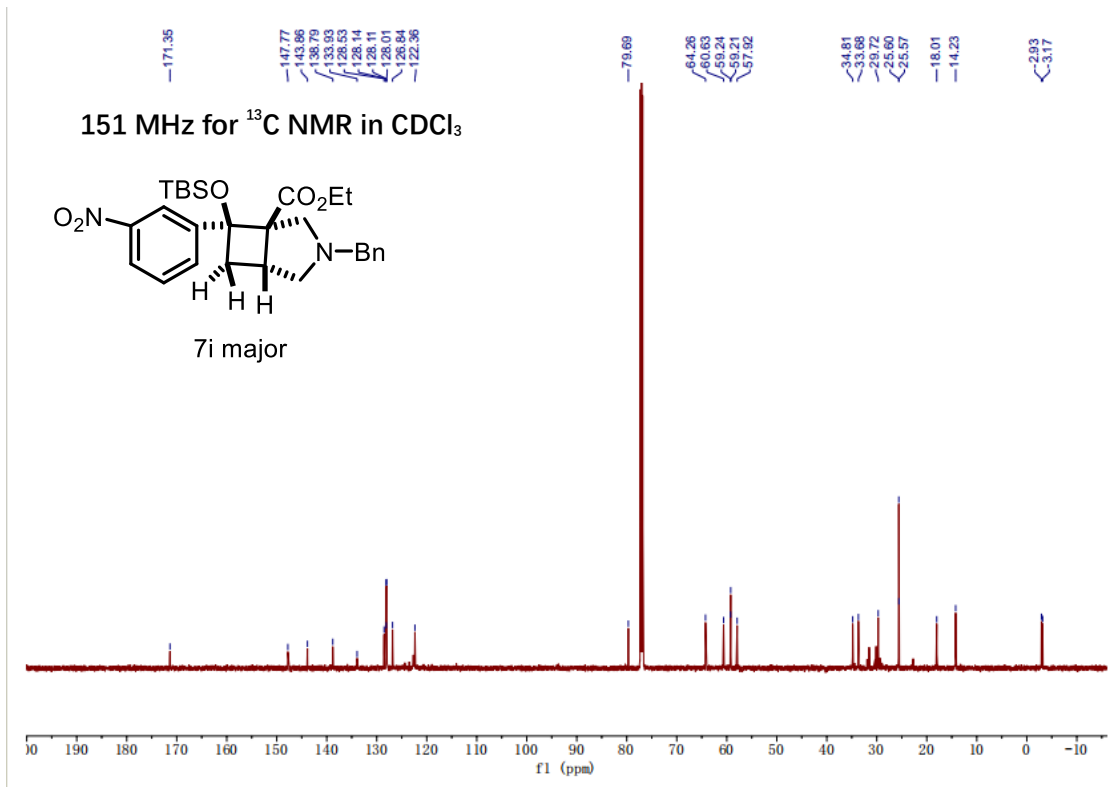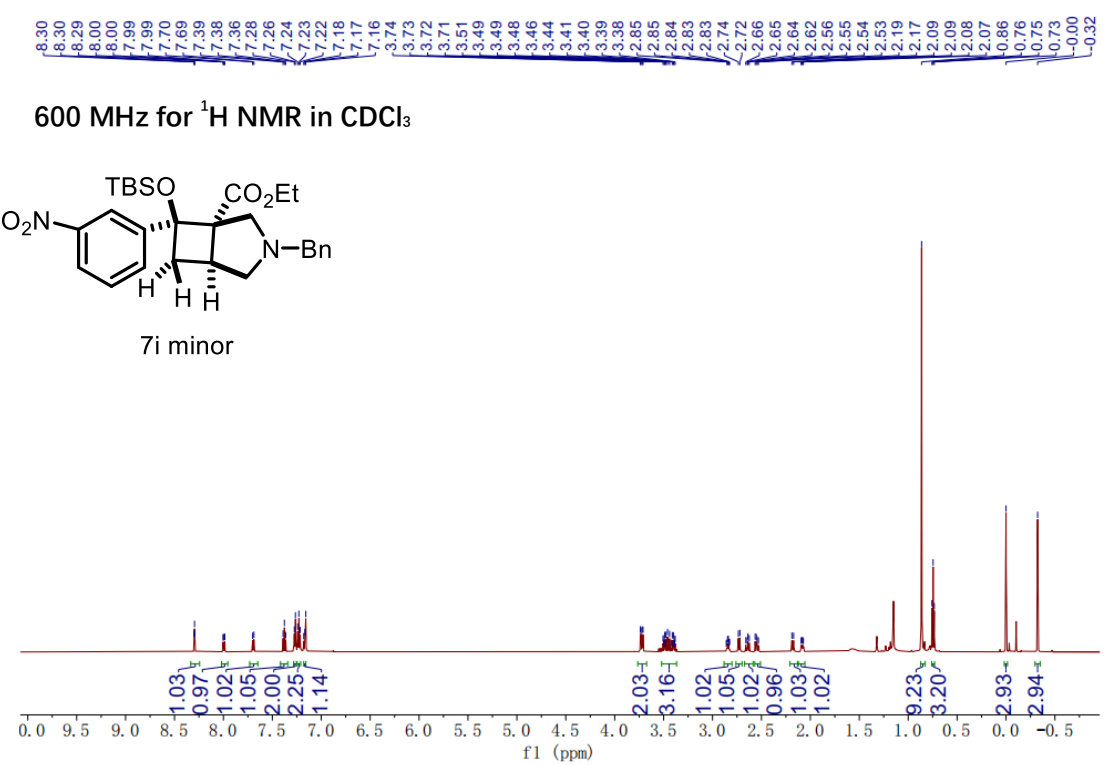

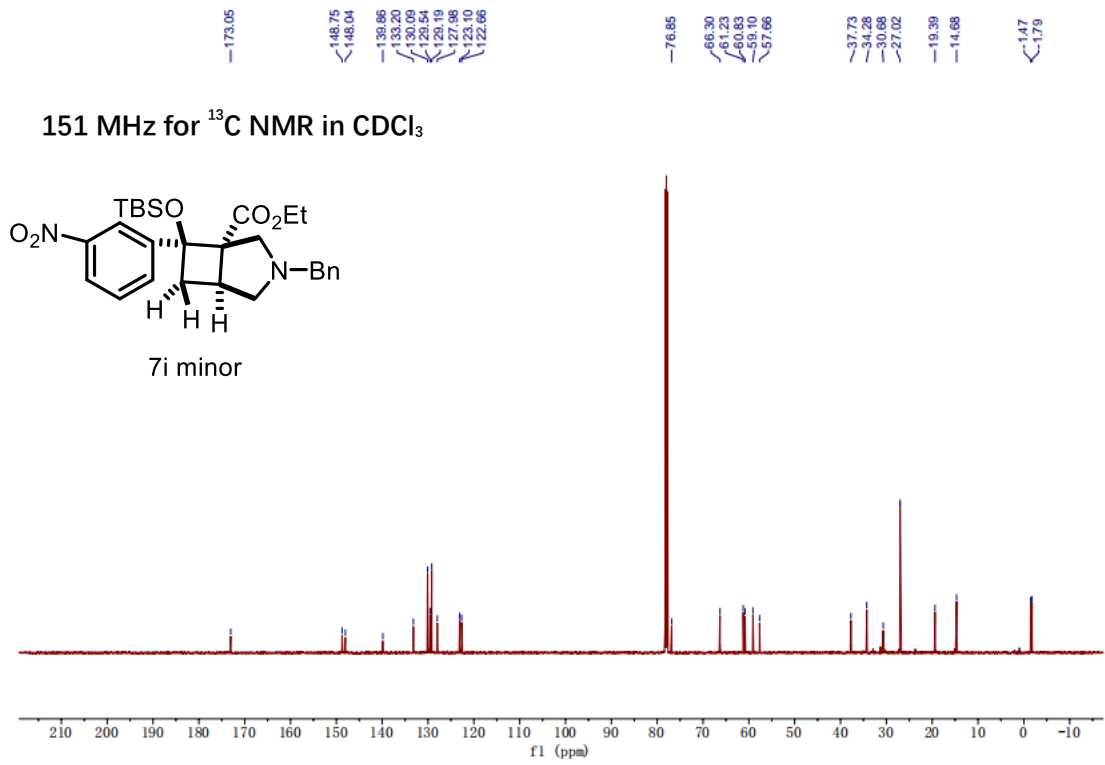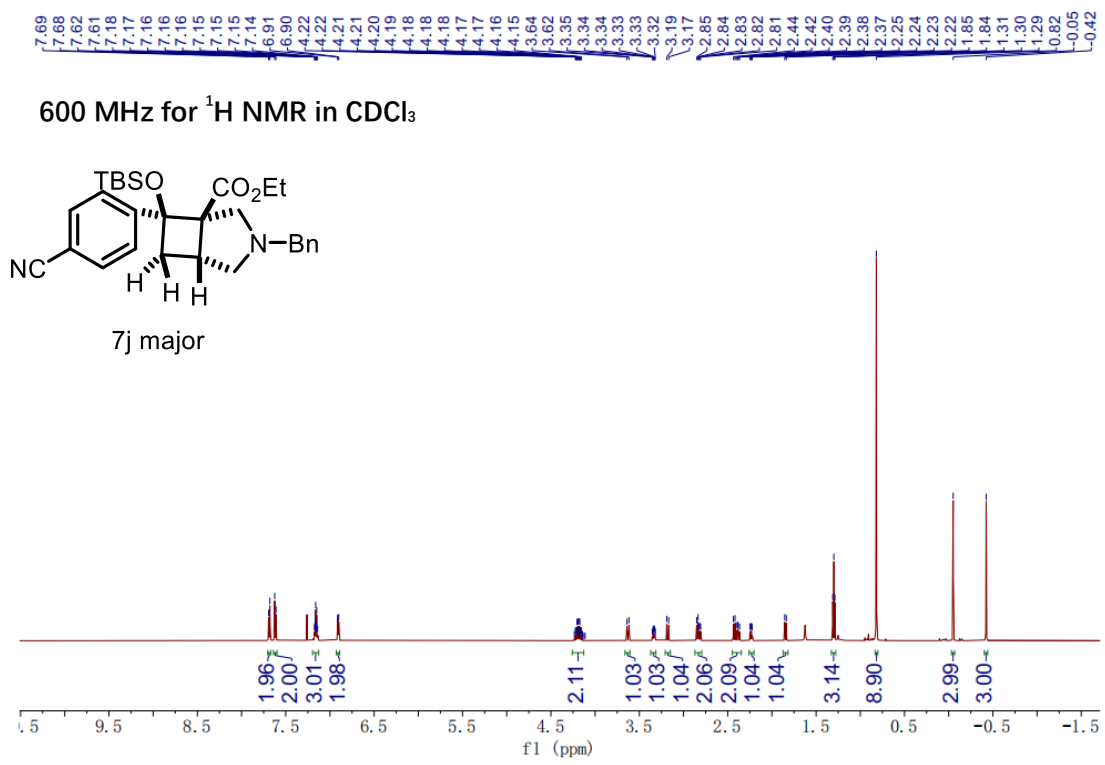

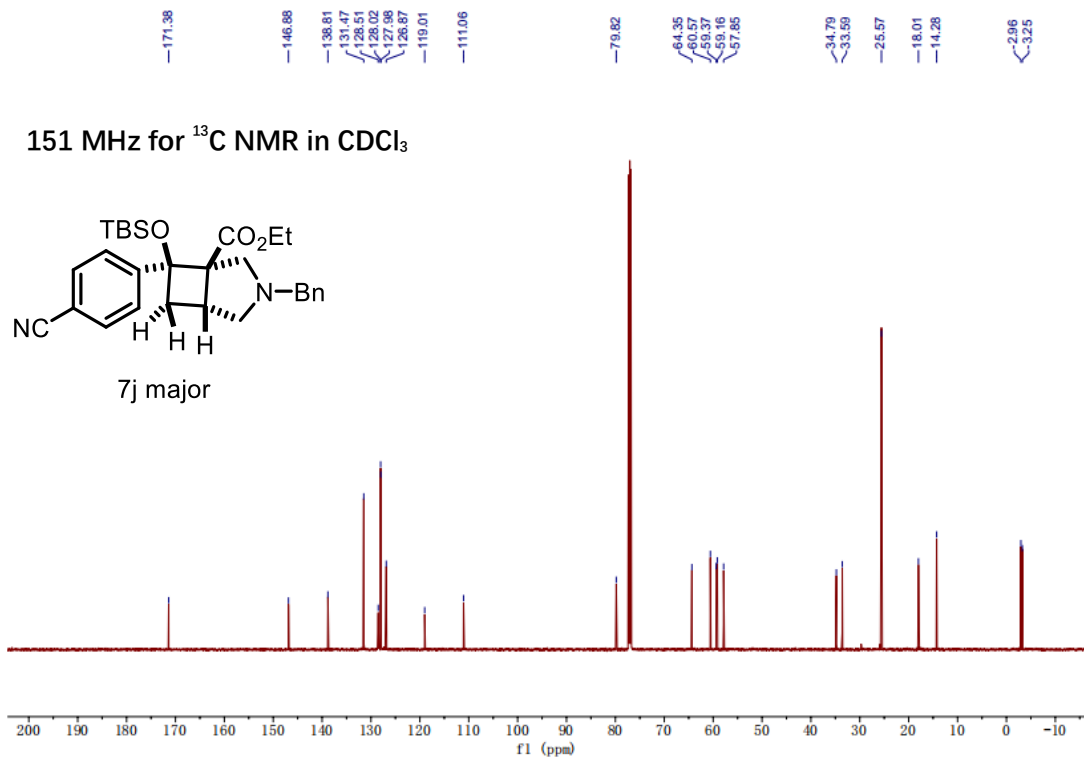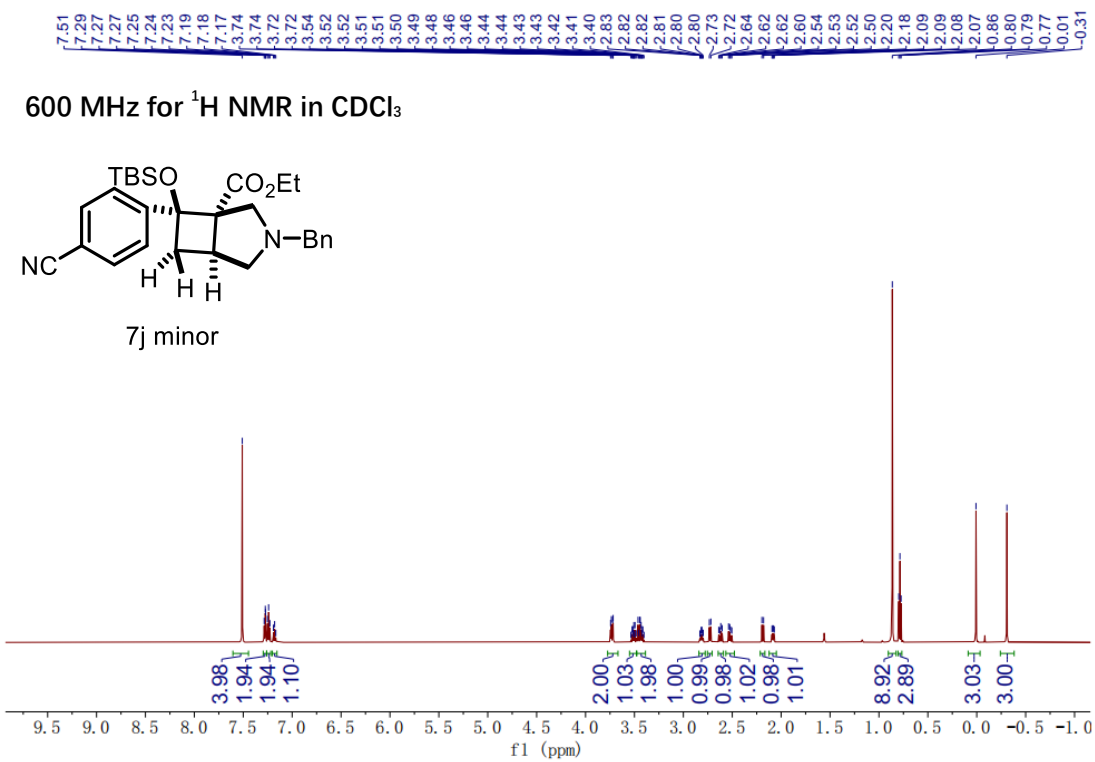

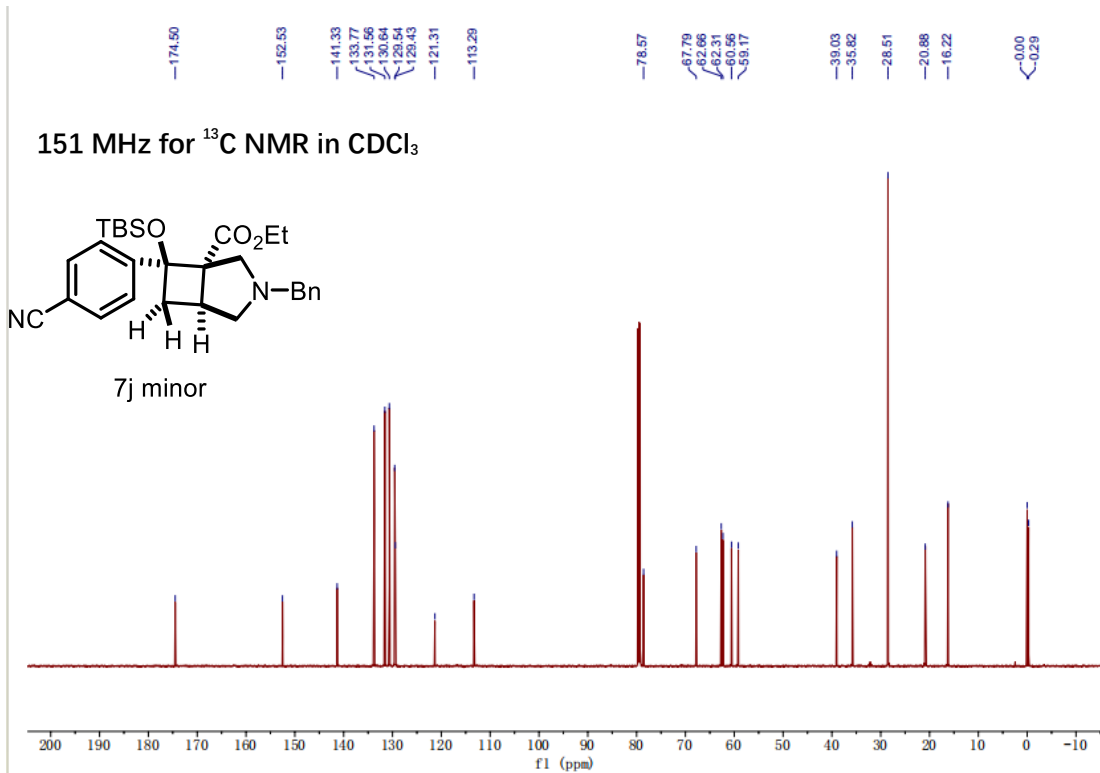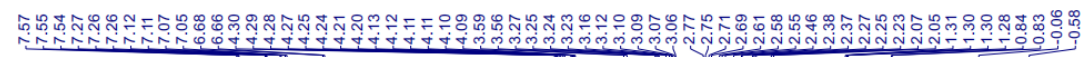

400 MHz for  $^1\text{H}$  NMR in  $\text{CDCl}_3$

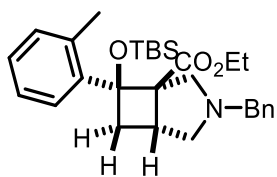

7k was a 3.8:1 diastereoisomeric mixture

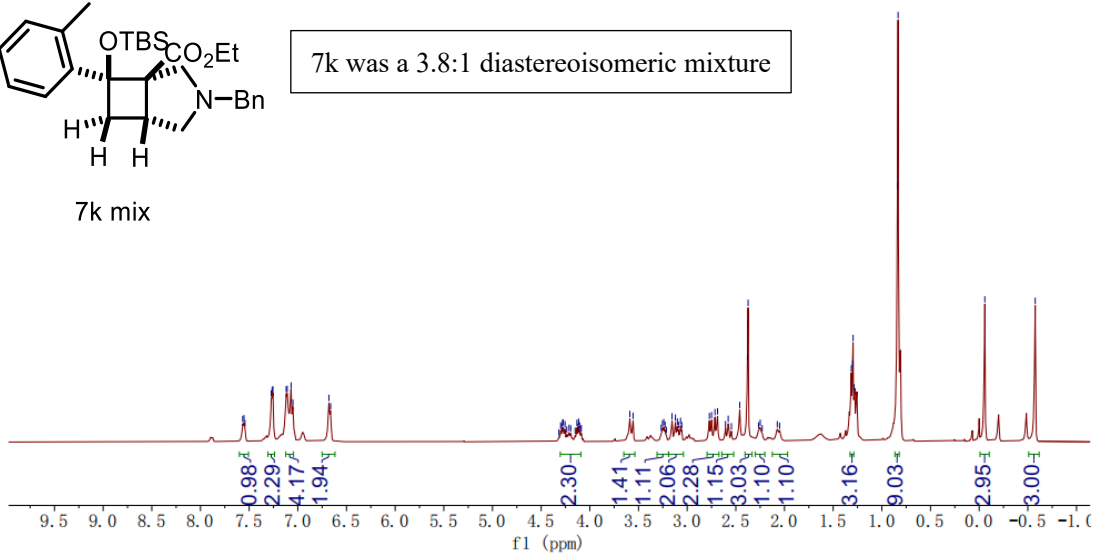



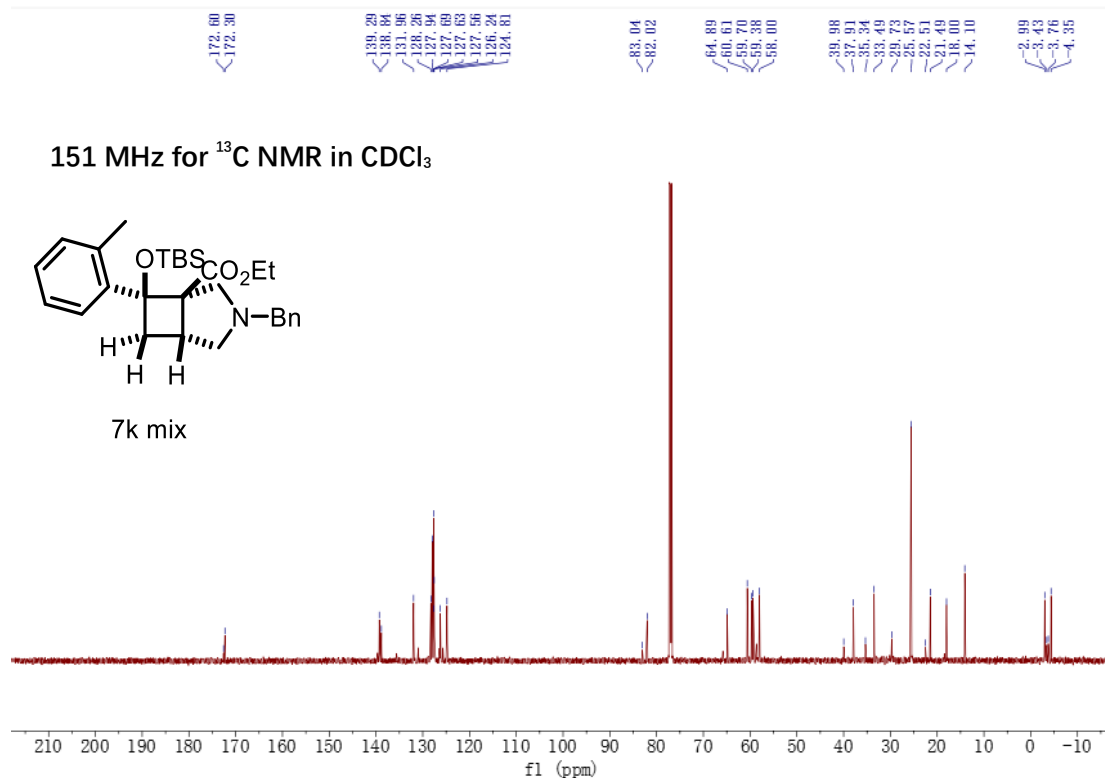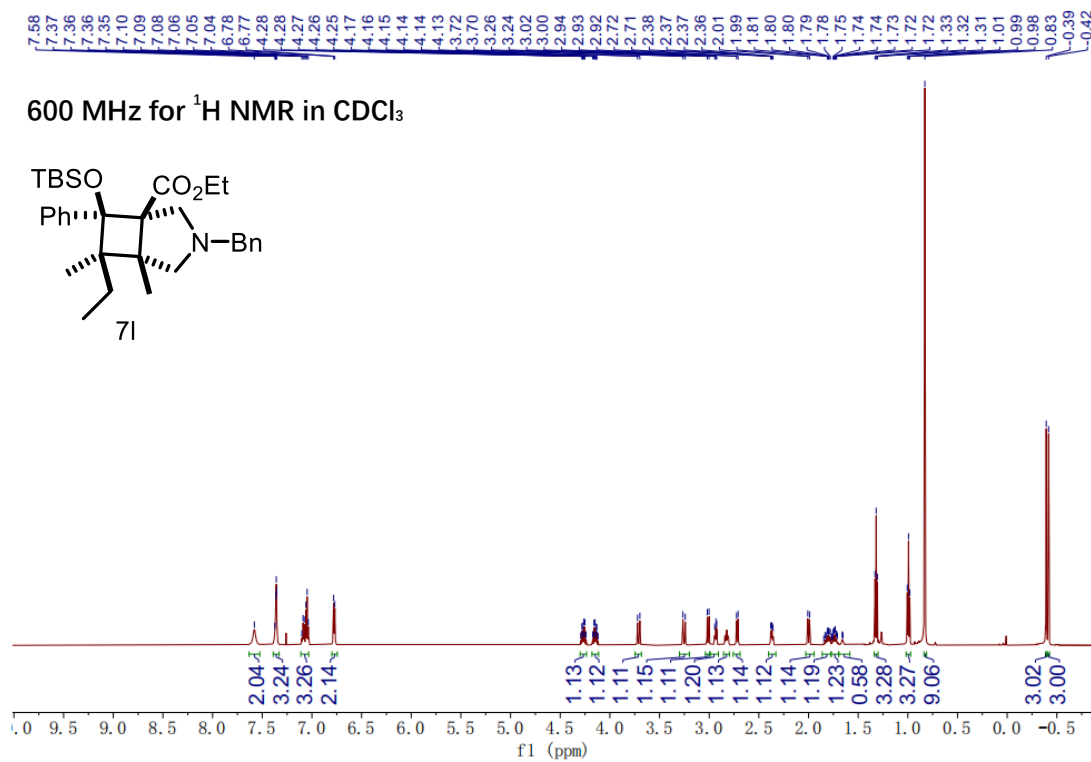

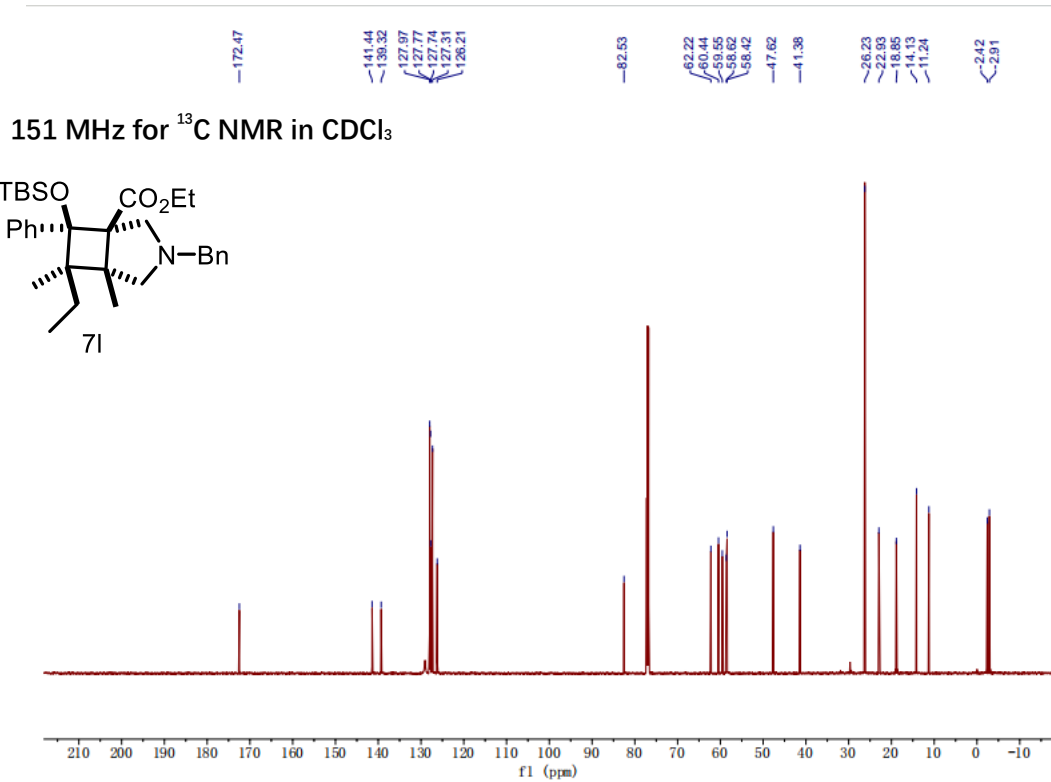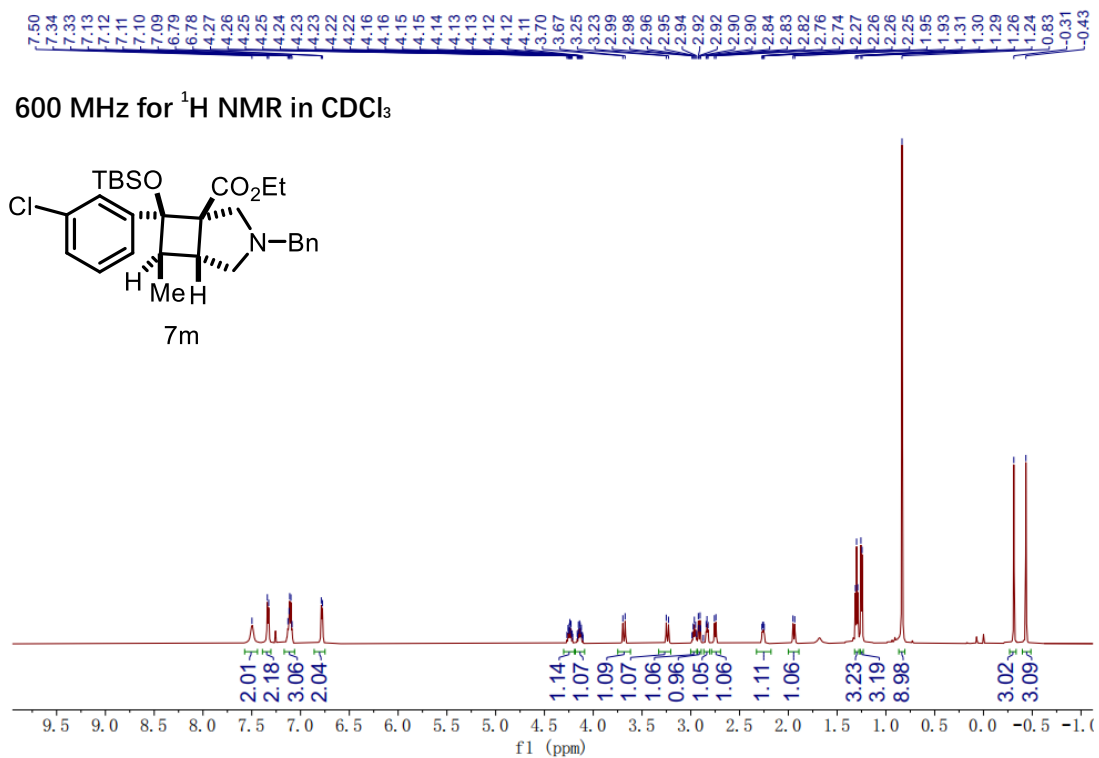

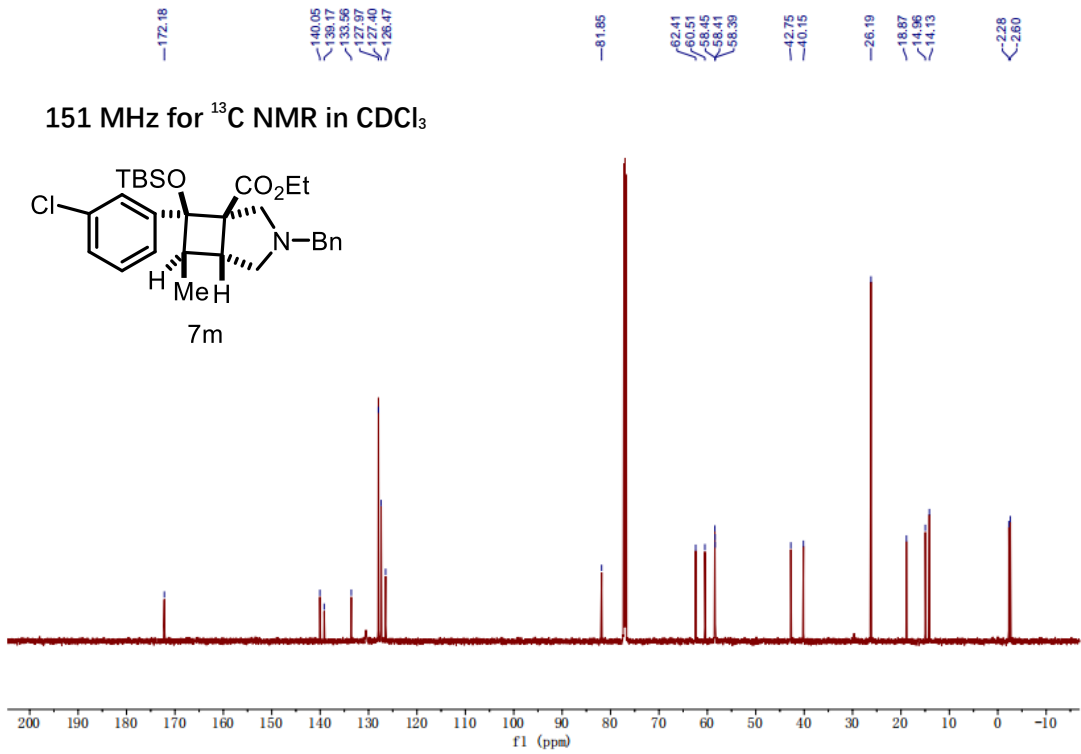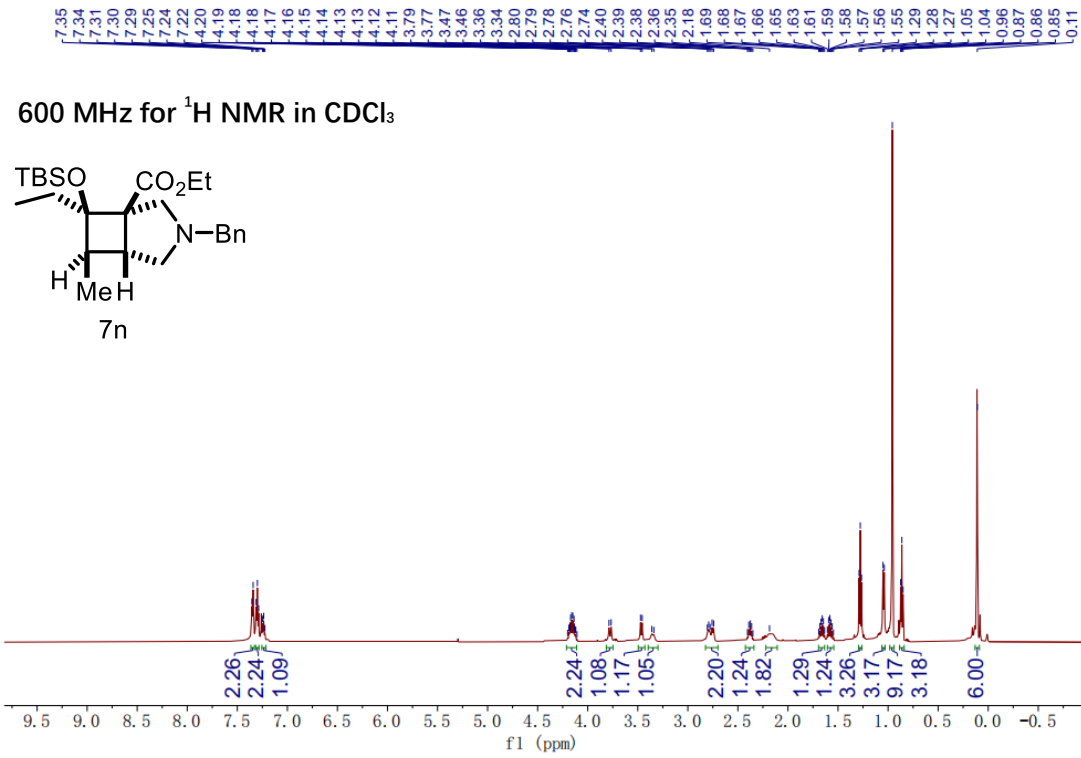

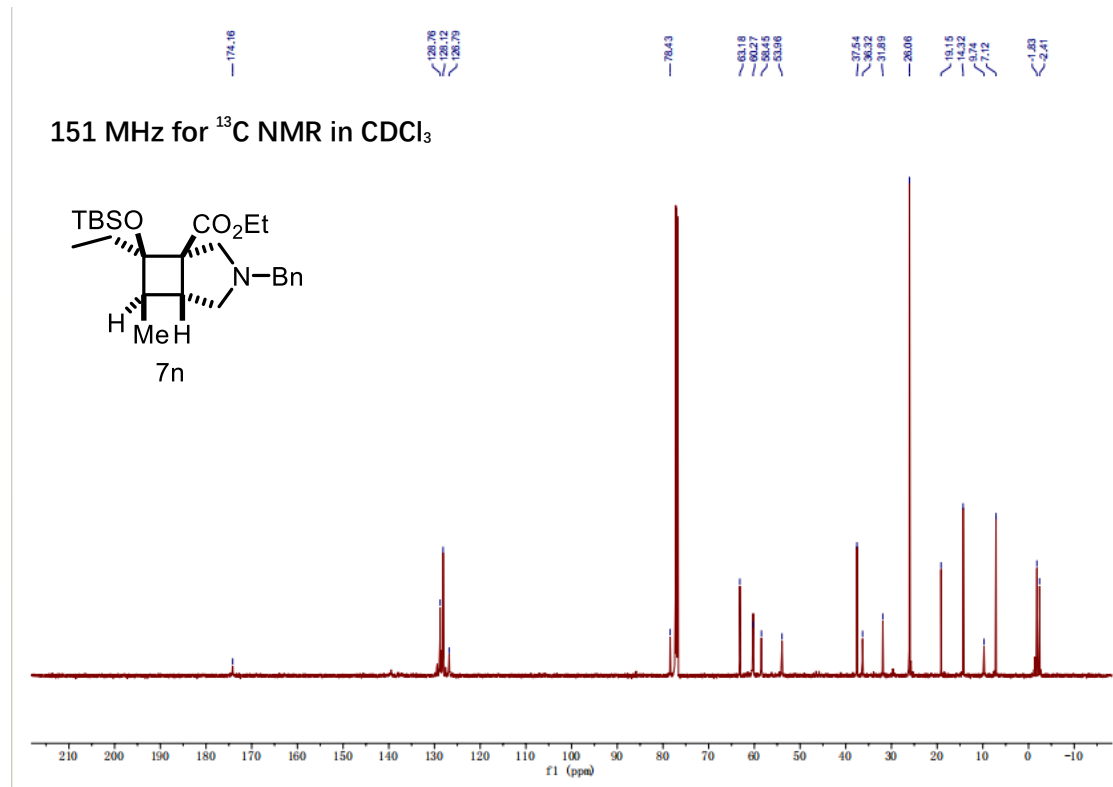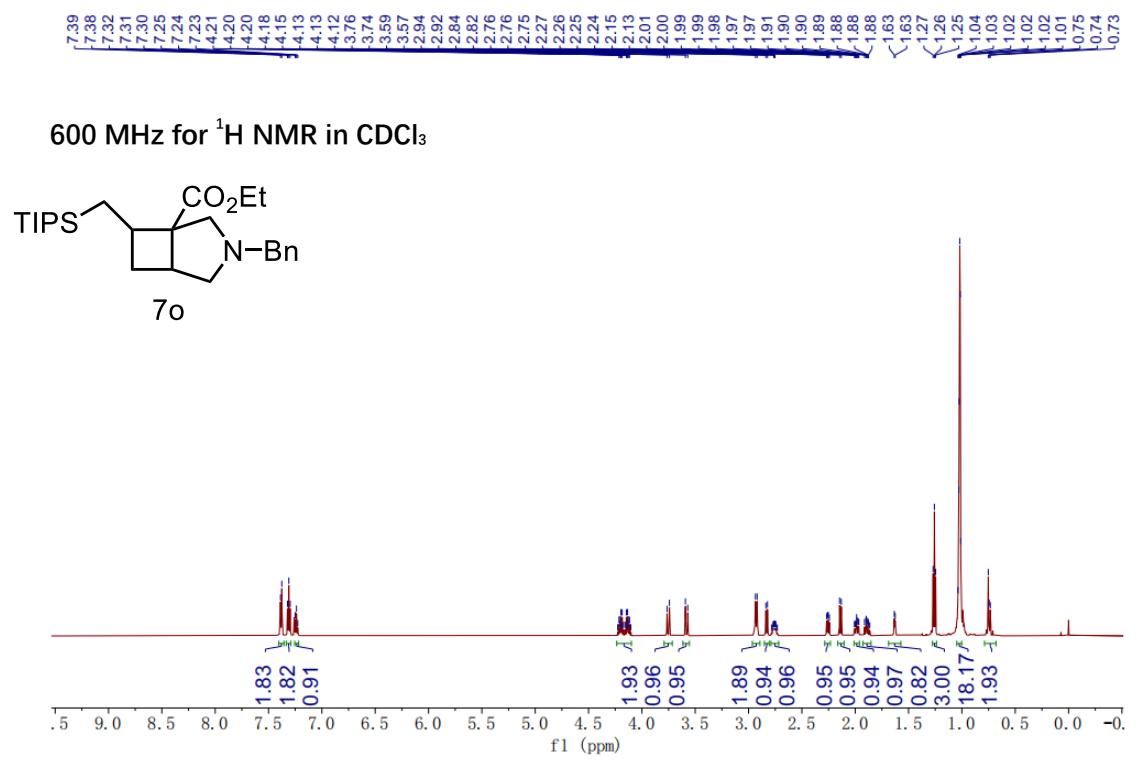



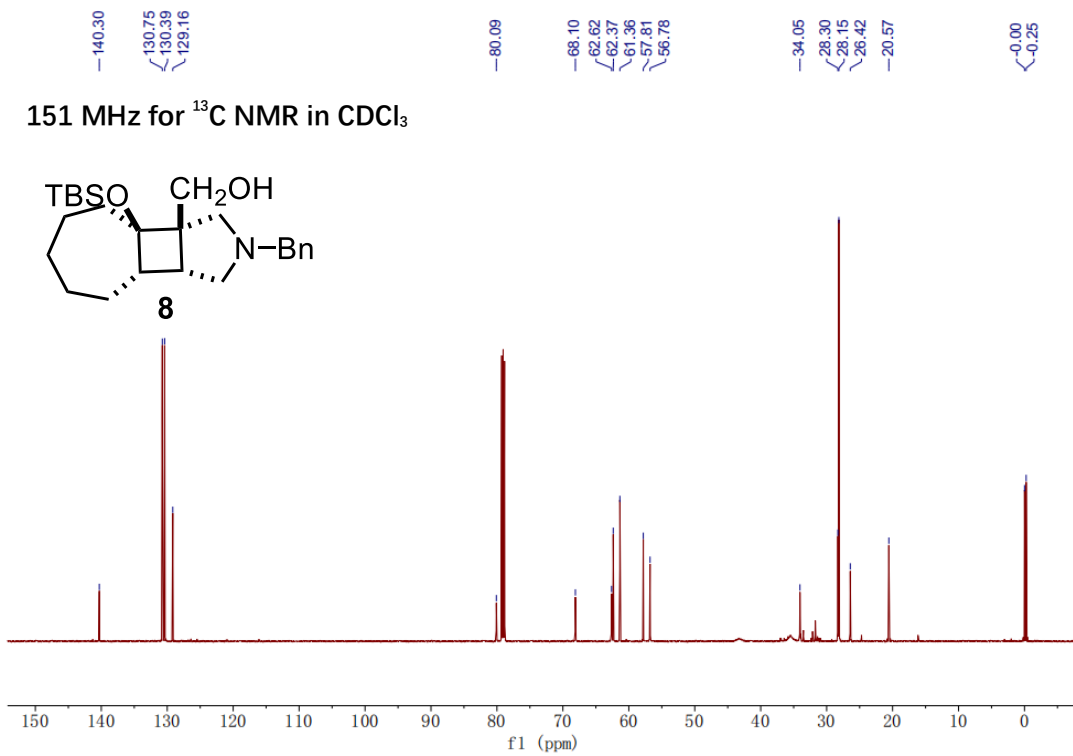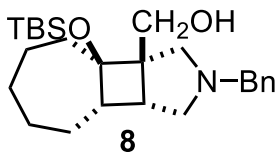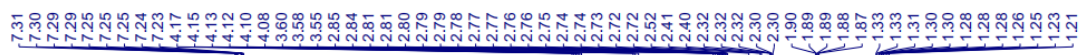

400 MHz for  $^1\text{H}$  NMR in  $\text{CDCl}_3$

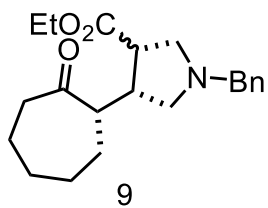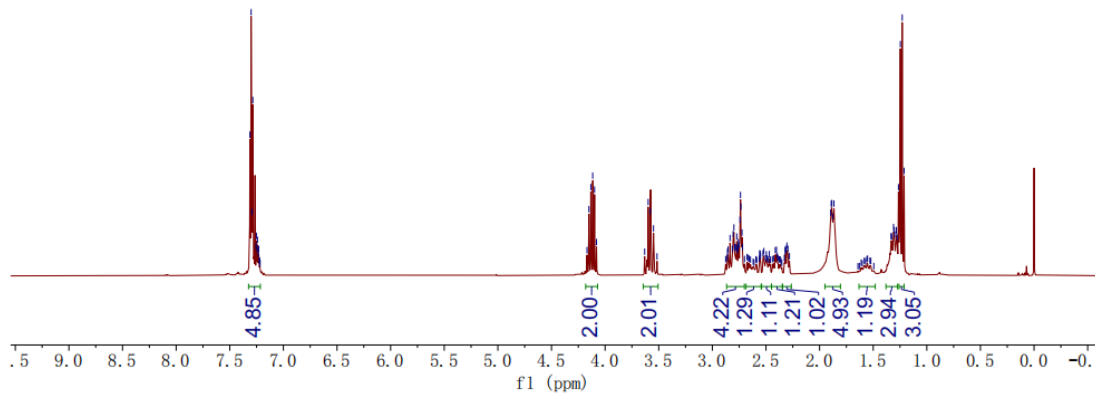

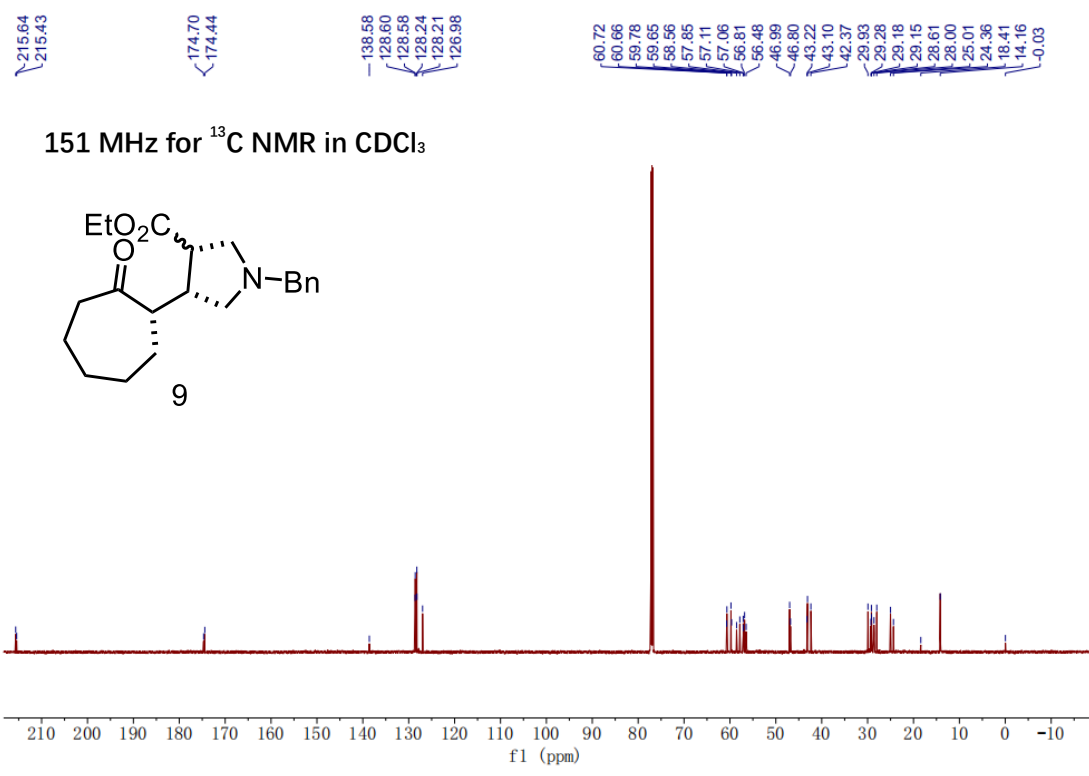

Supplement: d4qo00483c1.pdf [file d4qo00483c1.pdf]
